# Supplementary material
Source: publisher figshare collection journal article supplement (https://frontiersin.figshare.com/ndownloader/files/14101514)
Supplement: Supplementary file [file 14101514]

**Table S2.** Differentially expressed genes between CD103+XCR1+MHCIIlow and CD8+XCR1+ DC in the sdLNs

Differentially expressed genes between CD103+XCR1+MHCIIlow and CD8+XCR1+ DC subsets  
The data are derived from TopTable analysis with an FDR<0.05.

| Gene ID       | Log2FC      | AveExpr     | t           | P.Value  | adj.P.Value | B            |
|---------------|-------------|-------------|-------------|----------|-------------|--------------|
| Serpib10      | 3.105630645 | 5.677656661 | 11.26569836 | 2.85E-10 | 3.07E-08    | 13.71156273  |
| Clec4b1       | 1.94472513  | 4.455076531 | 7.092279279 | 5.94E-07 | 1.41E-05    | 5.992395505  |
| Gpr141        | 1.729937043 | 6.446440822 | 8.524797416 | 3.37E-08 | 1.30E-06    | 8.897859584  |
| Sell          | 1.64166647  | 7.831860346 | 8.596261998 | 2.94E-08 | 1.18E-06    | 9.035523704  |
| Fdx1l         | 1.57179957  | 4.351755823 | 2.693844879 | 1.37E-02 | 4.15E-02    | -3.988741964 |
| Emb           | 1.479689605 | 7.983373404 | 6.631201892 | 1.59E-06 | 3.25E-05    | 4.998685442  |
| Cdca7         | 1.446674349 | 5.397573053 | 4.761962245 | 1.10E-04 | 9.35E-04    | 0.73002057   |
| Bex6          | 1.356102899 | 5.087320473 | 5.581247067 | 1.64E-05 | 2.14E-04    | 2.640116929  |
| Ccr2          | 1.347645905 | 8.945593659 | 7.812241432 | 1.36E-07 | 4.16E-06    | 7.487466264  |
| Ckap4         | 1.258814607 | 5.940182469 | 6.216284487 | 3.93E-06 | 6.63E-05    | 4.081537045  |
| Hist2h2bb     | 1.229066126 | 5.166653987 | 4.105342432 | 5.21E-04 | 3.25E-03    | -0.8159256   |
| Hist1h2ab     | 1.227873094 | 6.91739219  | 2.65937354  | 1.48E-02 | 4.38E-02    | -4.060048061 |
| A530064D06Rik | 1.195720271 | 4.824906537 | 2.669764154 | 1.45E-02 | 4.33E-02    | -4.038601018 |
| Klrb1b        | 1.17192328  | 6.37398408  | 6.497041806 | 2.12E-06 | 4.08E-05    | 4.704435041  |
| Chil5         | 1.125648479 | 6.259129028 | 5.942471734 | 7.24E-06 | 1.10E-04    | 3.465237896  |
| Hist2h2ab     | 1.105491936 | 7.317596392 | 4.055422028 | 5.86E-04 | 3.54E-03    | -0.93301747  |
| Esco2         | 1.099818386 | 5.266789131 | 4.971451276 | 6.73E-05 | 6.38E-04    | 1.222151036  |
| Clec4a2       | 1.065866648 | 4.46171855  | 4.591492717 | 1.65E-04 | 1.32E-03    | 0.32858362   |
| Pdlim1        | 1.042412193 | 6.176726668 | 3.646591786 | 1.54E-03 | 7.53E-03    | -1.884418902 |
| LOC102640273  | 1.01414036  | 4.717692076 | 3.720095783 | 1.30E-03 | 6.60E-03    | -1.714629907 |
| Cdca5         | 1.013804616 | 6.465459127 | 4.778809294 | 1.06E-04 | 9.06E-04    | 0.769656193  |
| Rad51         | 1.003944726 | 6.443806365 | 3.50057261  | 2.17E-03 | 9.77E-03    | -2.219511652 |
| Racgap1       | 1.002783833 | 6.844890032 | 5.227155802 | 3.71E-05 | 3.98E-04    | 1.819918464  |
| Psat1         | 1.001626539 | 5.968781552 | 5.435763175 | 2.29E-05 | 2.73E-04    | 2.304346886  |
| Gm14548       | 0.996139567 | 7.357601006 | 3.592834253 | 1.75E-03 | 8.26E-03    | -2.00814618  |
| Cd300a        | 0.994289843 | 6.707110784 | 3.624137274 | 1.63E-03 | 7.85E-03    | -1.936148081 |
| Dhcr24        | 0.992056325 | 7.184347266 | 7.005123486 | 7.14E-07 | 1.64E-05    | 5.806685573  |
| Mcm5          | 0.950113149 | 7.500254275 | 6.209318697 | 3.99E-06 | 6.69E-05    | 4.065963556  |
| Uhrf1         | 0.947318858 | 8.288915739 | 7.732542903 | 1.59E-07 | 4.68E-06    | 7.325422844  |
| S100a10       | 0.946978674 | 10.22979102 | 7.488672061 | 2.61E-07 | 7.09E-06    | 6.824216666  |
| Gm1966        | 0.926488204 | 7.856155264 | 6.555751367 | 1.87E-06 | 3.67E-05    | 4.833477877  |
| Ifi203        | 0.918465745 | 8.372503605 | 6.357378835 | 2.88E-06 | 5.27E-05    | 4.395756463  |
| Cd226         | 0.91793557  | 6.123845494 | 3.265681788 | 3.76E-03 | 1.50E-02    | -2.75099856  |
| Lyl1          | 0.917908417 | 5.370303578 | 5.129827476 | 4.65E-05 | 4.75E-04    | 1.5928495    |
| Cxx1b         | 0.884042973 | 7.029144456 | 4.762763172 | 1.10E-04 | 9.35E-04    | 0.73190508   |
| Spc24         | 0.877065081 | 6.634818845 | 5.139381967 | 4.55E-05 | 4.66E-04    | 1.615167054  |
| Ifitm3        | 0.860885798 | 9.440855115 | 5.430725743 | 2.32E-05 | 2.75E-04    | 2.292688645  |
| Krt80         | 0.85845704  | 6.615562215 | 4.438450164 | 2.36E-04 | 1.76E-03    | -0.032097039 |
| Ctnnd2        | 0.856403436 | 6.170108896 | 5.945257494 | 7.19E-06 | 1.10E-04    | 3.471549666  |
| Arhgap19      | 0.85231443  | 5.605952042 | 4.072491321 | 5.63E-04 | 3.46E-03    | -0.89299622  |
| Wbp5          | 0.851944107 | 7.829932972 | 5.204834452 | 3.91E-05 | 4.16E-04    | 1.767897014  |
| Ect2          | 0.850865102 | 6.642866292 | 5.174753737 | 4.19E-05 | 4.37E-04    | 1.697739451  |
| Hist1h2bf     | 0.847385172 | 8.767130309 | 4.067529232 | 5.70E-04 | 3.49E-03    | -0.904632277 |
| E2f8          | 0.842517248 | 6.283492015 | 4.976220262 | 6.66E-05 | 6.32E-04    | 1.233332756  |
| Shcbp1        | 0.841237143 | 5.881510491 | 3.106755855 | 5.42E-03 | 1.98E-02    | -3.104054491 |
| Dtl           | 0.834478507 | 6.323683569 | 4.868361223 | 8.57E-05 | 7.57E-04    | 0.980185974  |
| Dck           | 0.831331113 | 6.87177999  | 4.919488362 | 7.60E-05 | 6.97E-04    | 1.100245773  |
| Gins2         | 0.828843488 | 7.687115237 | 5.716956473 | 1.20E-05 | 1.67E-04    | 2.951612738  |
| Cdca3         | 0.828418526 | 6.821949373 | 3.820388343 | 1.02E-03 | 5.50E-03    | -1.481944284 |
| Sh2d1b1       | 0.825318239 | 4.516968073 | 2.374164303 | 2.74E-02 | 7.02E-02    | -4.631690814 |
| Ifi27l2a      | 0.825095049 | 8.018114552 | 5.294476174 | 3.17E-05 | 3.50E-04    | 1.976604177  |
| Abcb1b        | 0.823994198 | 5.72263566  | 2.578668974 | 1.77E-02 | 5.00E-02    | -4.225217901 |
| Mmp12         | 0.820834444 | 6.593020593 | 2.657330134 | 1.49E-02 | 4.40E-02    | -4.064261036 |
| Cd22          | 0.820370218 | 6.406835851 | 5.047030409 | 5.64E-05 | 5.55E-04    | 1.3992243    |
| Fam111a       | 0.819410247 | 8.15542721  | 5.462959637 | 2.15E-05 | 2.65E-04    | 2.36725217   |
| Ms4a6c        | 0.811558078 | 7.748411    | 3.582405982 | 1.79E-03 | 8.44E-03    | -2.032100742 |
| Il31ra        | 0.810760262 | 5.148853816 | 4.684760511 | 1.32E-04 | 1.10E-03    | 0.548292465  |
| Gins1         | 0.80941557  | 6.392274297 | 5.42915471  | 2.33E-05 | 2.75E-04    | 2.289052345  |
| 2810417H13Rik | 0.807667172 | 6.605113048 | 3.080528447 | 5.75E-03 | 2.08E-02    | -3.161729914 |
| Kifc1         | 0.802216932 | 5.876097953 | 2.11962277  | 4.63E-02 | 1.05E-01    | -5.110140451 |
| Rad51ap1      | 0.80028853  | 5.652995835 | 3.695190888 | 1.38E-03 | 6.88E-03    | -1.772233825 |
| Nuf2          | 0.800160083 | 6.831419082 | 3.70030097  | 1.36E-03 | 6.83E-03    | -1.760420559 |

|               |             |             |             |          |          |              |
|---------------|-------------|-------------|-------------|----------|----------|--------------|
| Milr1         | 0.791612849 | 6.356383792 | 2.797673073 | 1.09E-02 | 3.45E-02 | -3.771383041 |
| 1110001J03Rik | 0.791265888 | 8.123282875 | 4.684472837 | 1.32E-04 | 1.10E-03 | 0.547615035  |
| Rgs18         | 0.790816258 | 7.008813238 | 3.639027672 | 1.57E-03 | 7.64E-03 | -1.901852165 |
| E2f7          | 0.788674489 | 5.74246035  | 5.500830945 | 1.97E-05 | 2.48E-04 | 2.454745184  |
| Cd209a        | 0.788019897 | 7.100332225 | 3.62092912  | 1.64E-03 | 7.89E-03 | -1.943533227 |
| Plac8         | 0.787580652 | 9.747400092 | 3.689347478 | 1.39E-03 | 6.94E-03 | -1.785738427 |
| Asf1b         | 0.787431162 | 6.814742429 | 3.975926165 | 7.08E-04 | 4.09E-03 | -1.119161299 |
| Prim1         | 0.769552117 | 6.635813257 | 3.271766101 | 3.70E-03 | 1.48E-02 | -2.737368231 |
| Rrm1          | 0.76827715  | 7.725356115 | 6.717096157 | 1.32E-06 | 2.78E-05 | 5.185885892  |
| Cdkn3         | 0.767670679 | 6.479366691 | 3.097432449 | 5.53E-03 | 2.02E-02 | -3.124577363 |
| Nusap1        | 0.766539945 | 7.094866574 | 3.647228655 | 1.54E-03 | 7.53E-03 | -1.882950742 |
| Tyms          | 0.763642232 | 7.393578347 | 4.593284529 | 1.64E-04 | 1.32E-03 | 0.332805732  |
| Ncapd2        | 0.761687502 | 7.284973666 | 4.78672766  | 1.04E-04 | 8.94E-04 | 0.788282564  |
| Rsph3a        | 0.760583406 | 6.627604681 | 2.114466698 | 4.68E-02 | 1.06E-01 | -5.119483728 |
| Mcm3          | 0.760163684 | 7.943897165 | 6.060912803 | 5.55E-06 | 8.83E-05 | 3.732851443  |
| Prr11         | 0.758210101 | 7.336073471 | 4.328151849 | 3.07E-04 | 2.17E-03 | -0.291962056 |
| Clspn         | 0.756835904 | 6.121162963 | 3.983228044 | 6.96E-04 | 4.04E-03 | -1.102081625 |
| Figl1         | 0.7562429   | 5.726990431 | 3.272723052 | 3.70E-03 | 1.48E-02 | -2.73522371  |
| Ccna2         | 0.755126521 | 7.486485905 | 3.002911947 | 6.87E-03 | 2.39E-02 | -3.331345879 |
| Mcm7          | 0.750739672 | 6.914199869 | 4.552161039 | 1.81E-04 | 1.43E-03 | 0.235897268  |
| Cdc45         | 0.74988716  | 6.657804356 | 8.000894562 | 9.33E-08 | 3.08E-06 | 7.867588985  |
| Hmga1-rs1     | 0.749860941 | 9.655638175 | 4.045572715 | 6.00E-04 | 3.60E-03 | -0.956102536 |
| Chaf1a        | 0.747717508 | 6.586308494 | 4.330452046 | 3.05E-04 | 2.16E-03 | -0.286544769 |
| Rnd3          | 0.744909475 | 9.183053008 | 6.14515485  | 4.60E-06 | 7.48E-05 | 3.922248575  |
| Dctpp1        | 0.744615133 | 8.693015794 | 4.004577935 | 6.61E-04 | 3.90E-03 | -1.052120738 |
| Pbk           | 0.743380014 | 6.318359666 | 3.423510804 | 2.60E-03 | 1.12E-02 | -2.395003546 |
| Shmt2         | 0.740235864 | 6.958254088 | 3.81478907  | 1.04E-03 | 5.56E-03 | -1.494963156 |
| Snora17       | 0.739773703 | 6.176337473 | 2.85354876  | 9.62E-03 | 3.12E-02 | -3.652887706 |
| Tcf19         | 0.738261014 | 6.22572444  | 4.296802065 | 3.31E-04 | 2.31E-03 | -0.365783347 |
| Nrp1          | 0.737444925 | 6.127841616 | 5.448046066 | 2.23E-05 | 2.72E-04 | 2.332764724  |
| Anln          | 0.737024054 | 6.283065888 | 5.416452356 | 2.40E-05 | 2.81E-04 | 2.259644214  |
| Cnn3          | 0.734429978 | 6.723065266 | 2.487659433 | 2.15E-02 | 5.83E-02 | -4.408335981 |
| Kif11         | 0.733601999 | 7.209686623 | 6.592720609 | 1.72E-06 | 3.42E-05 | 4.914515508  |
| Ccnb2         | 0.731259387 | 7.145030868 | 2.722153651 | 1.29E-02 | 3.95E-02 | -3.9298572   |
| Hist1h2an     | 0.728801495 | 8.371550245 | 3.493786039 | 2.21E-03 | 9.88E-03 | -2.235006729 |
| Kif4          | 0.727557495 | 6.112230354 | 3.863443946 | 9.24E-04 | 5.07E-03 | -1.381733403 |
| Zdhhc15       | 0.725922867 | 5.807321038 | 3.473211816 | 2.32E-03 | 1.03E-02 | -2.281935395 |
| Stil          | 0.725554216 | 6.086438878 | 5.44572129  | 2.24E-05 | 2.72E-04 | 2.327387049  |
| Kntc1         | 0.722691244 | 5.508194284 | 5.033013378 | 5.83E-05 | 5.66E-04 | 1.366406485  |
| Ckap2l        | 0.721051575 | 5.816784486 | 3.92186938  | 8.05E-04 | 4.54E-03 | -1.245478669 |
| BC147527      | 0.720600555 | 6.31984269  | 2.358336097 | 2.83E-02 | 7.21E-02 | -4.662375175 |
| Wdhd1         | 0.719966669 | 7.084076548 | 5.069227123 | 5.36E-05 | 5.30E-04 | 1.451171038  |
| 5430402E10Rik | 0.719925491 | 1.758841863 | 2.120210072 | 4.63E-02 | 1.05E-01 | -5.10907528  |
| Cks1b         | 0.718497311 | 8.850983575 | 4.220590649 | 3.96E-04 | 2.64E-03 | -0.545130736 |
| Mki67         | 0.717981755 | 8.862648692 | 4.714195576 | 1.23E-04 | 1.04E-03 | 0.617598142  |
| Dhfr          | 0.712874174 | 5.5654861   | 3.902828601 | 8.42E-04 | 4.69E-03 | -1.289916408 |
| Lbr           | 0.709200572 | 6.872942257 | 3.823540385 | 1.02E-03 | 5.47E-03 | -1.47461409  |
| Mcm6          | 0.704835432 | 8.373850819 | 4.766954969 | 1.09E-04 | 9.30E-04 | 0.741767702  |
| Cenph         | 0.704268782 | 6.515609191 | 4.110012951 | 5.15E-04 | 3.22E-03 | -0.804963536 |
| Lig1          | 0.70316322  | 8.180028593 | 8.077760319 | 8.02E-08 | 2.70E-06 | 8.02107861   |
| Sec61b        | 0.702360237 | 9.228497948 | 3.900202965 | 8.47E-04 | 4.71E-03 | -1.296041763 |
| Stambpl1      | 0.69732547  | 6.595963499 | 3.061091493 | 6.01E-03 | 2.14E-02 | -3.204357523 |
| Syce2         | 0.69142832  | 7.435500125 | 5.43904777  | 2.27E-05 | 2.73E-04 | 2.311947377  |
| Birc5         | 0.691142037 | 6.453424096 | 3.689428157 | 1.39E-03 | 6.94E-03 | -1.785552    |
| Hmmr          | 0.686590753 | 5.981850155 | 5.436341968 | 2.29E-05 | 2.73E-04 | 2.305686265  |
| Foxm1         | 0.683768146 | 6.582058808 | 4.673114076 | 1.36E-04 | 1.12E-03 | 0.520865438  |
| Aurkb         | 0.681838562 | 6.940124183 | 2.663545555 | 1.47E-02 | 4.36E-02 | -4.051441565 |
| Ube2c         | 0.6790965   | 8.272575505 | 3.226879547 | 4.11E-03 | 1.60E-02 | -2.837735662 |
| Atad2         | 0.678392507 | 7.506059793 | 7.45531751  | 2.80E-07 | 7.43E-06 | 6.7550385    |
| Lgals1        | 0.67799832  | 9.844921301 | 5.159411565 | 4.34E-05 | 4.50E-04 | 1.661934161  |
| Kif22         | 0.677149828 | 6.124604266 | 4.067493586 | 5.70E-04 | 3.49E-03 | -0.904715861 |
| Cbx5          | 0.675491614 | 8.048774449 | 5.728271313 | 1.17E-05 | 1.63E-04 | 2.977504873  |
| Casc5         | 0.675344292 | 7.128899501 | 4.695412867 | 1.29E-04 | 1.08E-03 | 0.573375974  |
| Nrm           | 0.673217696 | 8.795855381 | 5.71043683  | 1.22E-05 | 1.69E-04 | 2.936687973  |
| Mcm2          | 0.673031389 | 7.157555036 | 4.885479467 | 8.24E-05 | 7.43E-04 | 1.02039604   |
| Cenpa         | 0.670599436 | 6.942435553 | 5.01916904  | 6.02E-05 | 5.83E-04 | 1.333982687  |
| Exosc8        | 0.666886299 | 8.512593988 | 6.613890702 | 1.65E-06 | 3.34E-05 | 4.960843816  |
| Pola1         | 0.665840816 | 6.805403006 | 3.837928618 | 9.81E-04 | 5.34E-03 | -1.441141261 |

|               |             |             |             |          |          |              |
|---------------|-------------|-------------|-------------|----------|----------|--------------|
| Mef2c         | 0.665672078 | 7.304929711 | 3.539874405 | 1.98E-03 | 9.11E-03 | -2.129633068 |
| Plk1          | 0.664267785 | 6.298864528 | 3.351591801 | 3.08E-03 | 1.29E-02 | -2.557827611 |
| Ncaph         | 0.664173788 | 6.332242332 | 3.413360012 | 2.66E-03 | 1.15E-02 | -2.418042816 |
| Hist1h2af     | 0.663346785 | 7.634328566 | 3.10563582  | 5.43E-03 | 1.99E-02 | -3.106521104 |
| Cysltr1       | 0.660787605 | 5.337569228 | 2.666295064 | 1.46E-02 | 4.35E-02 | -4.045765997 |
| Cotl1         | 0.659515966 | 8.606640306 | 3.393514913 | 2.79E-03 | 1.19E-02 | -2.463031171 |
| Ndc80         | 0.655218054 | 7.265193978 | 2.906664691 | 8.54E-03 | 2.87E-02 | -3.539315248 |
| Ccnf          | 0.654582801 | 5.685526494 | 4.137499023 | 4.83E-04 | 3.06E-03 | -0.740429114 |
| Aspm          | 0.653551118 | 5.80728042  | 3.922723115 | 8.03E-04 | 4.54E-03 | -1.243485499 |
| H2afx         | 0.6528641   | 10.35689016 | 4.625076058 | 1.52E-04 | 1.24E-03 | 0.407710737  |
| Cdca8         | 0.651388612 | 7.372109183 | 4.131924417 | 4.89E-04 | 3.09E-03 | -0.753520737 |
| Kif18b        | 0.647174566 | 6.065445181 | 2.853700213 | 9.62E-03 | 3.12E-02 | -3.652565136 |
| Diap3         | 0.647001275 | 6.309115058 | 2.826669626 | 1.02E-02 | 3.29E-02 | -3.710018244 |
| Fcer1g        | 0.645984785 | 10.27034666 | 6.343140074 | 2.97E-06 | 5.36E-05 | 4.364153699  |
| Dlgap5        | 0.645644391 | 6.945147684 | 6.824067398 | 1.05E-06 | 2.27E-05 | 5.417703201  |
| Ms4a4c        | 0.644761657 | 6.976595002 | 2.603500784 | 1.67E-02 | 4.80E-02 | -4.174667974 |
| Gpr183        | 0.642769664 | 8.736456522 | 4.613308032 | 1.56E-04 | 1.26E-03 | 0.379985262  |
| Hpgd          | 0.642650758 | 7.028232134 | 2.853597312 | 9.62E-03 | 3.12E-02 | -3.6527843   |
| Klri2         | 0.640696115 | 5.958130431 | 2.331328034 | 3.00E-02 | 7.55E-02 | -4.714460245 |
| Sept11        | 0.638934722 | 8.52495266  | 4.948879709 | 7.10E-05 | 6.63E-04 | 1.169213319  |
| Gm4956        | 0.636125166 | 5.336935621 | 2.418195315 | 2.49E-02 | 6.51E-02 | -4.545724398 |
| Srm           | 0.629120401 | 7.430320503 | 3.135431034 | 5.07E-03 | 1.89E-02 | -3.040796816 |
| Mis18bp1      | 0.628715227 | 5.871107781 | 5.438738342 | 2.28E-05 | 2.73E-04 | 2.311231405  |
| Cdc7          | 0.628635683 | 6.252031741 | 3.128156277 | 5.16E-03 | 1.92E-02 | -3.056864401 |
| Serpinb2      | 0.626679482 | 4.017203926 | 2.341823361 | 2.93E-02 | 7.41E-02 | -4.694261107 |
| Haus1         | 0.625840687 | 7.063965573 | 3.408403931 | 2.70E-03 | 1.16E-02 | -2.429284878 |
| Dkc1          | 0.623632607 | 6.678650642 | 3.995695713 | 6.75E-04 | 3.96E-03 | -1.072909918 |
| Slc7a5        | 0.622842275 | 8.415955372 | 5.107792999 | 4.90E-05 | 4.93E-04 | 1.541359819  |
| Bub1          | 0.622036666 | 5.929172823 | 4.011119871 | 6.51E-04 | 3.86E-03 | -1.036805622 |
| Top2a         | 0.612446671 | 8.384721952 | 5.139845675 | 4.54E-05 | 4.66E-04 | 1.616250047  |
| Galk1         | 0.607932272 | 5.981854271 | 4.430790439 | 2.41E-04 | 1.78E-03 | -0.050148224 |
| Cox6b2        | 0.606223858 | 6.884386771 | 3.015216331 | 6.68E-03 | 2.35E-02 | -3.304566537 |
| B930041F14Rik | 0.60079899  | 5.652051417 | 3.318727244 | 3.32E-03 | 1.36E-02 | -2.631902218 |
| Hist1h1c      | 0.60074811  | 8.548923635 | 2.752970613 | 1.20E-02 | 3.74E-02 | -3.865428937 |
| Hells         | 0.600213612 | 7.467238717 | 5.195991448 | 3.99E-05 | 4.22E-04 | 1.747278555  |
| Lsm2          | 0.592626432 | 8.462852179 | 3.559970041 | 1.89E-03 | 8.81E-03 | -2.083584013 |
| Ybx3          | 0.591577258 | 9.667879521 | 7.408020812 | 3.08E-07 | 8.07E-06 | 6.656685877  |
| Ticam2        | 0.591329692 | 6.536630763 | 3.720487209 | 1.30E-03 | 6.60E-03 | -1.713723963 |
| Tkt           | 0.591151043 | 8.508079739 | 4.953401376 | 7.02E-05 | 6.58E-04 | 1.179820031  |
| Smc2          | 0.58942957  | 8.104656369 | 5.342254974 | 2.84E-05 | 3.20E-04 | 2.087608422  |
| Ncapg         | 0.586704333 | 6.221170747 | 3.39650179  | 2.77E-03 | 1.18E-02 | -2.456264622 |
| Hirip3        | 0.578635845 | 6.42377956  | 5.582311894 | 1.64E-05 | 2.14E-04 | 2.642567675  |
| Spag5         | 0.577699831 | 6.289914974 | 3.198574922 | 4.39E-03 | 1.68E-02 | -2.900794831 |
| Tbxas1        | 0.576772539 | 5.933410115 | 3.608584036 | 1.69E-03 | 8.05E-03 | -1.971938249 |
| Tipin         | 0.576693263 | 6.755392379 | 2.818123967 | 1.04E-02 | 3.35E-02 | -3.728132249 |
| Incenp        | 0.576290662 | 6.942759663 | 5.976101524 | 6.71E-06 | 1.04E-04 | 3.541378209  |
| Tpx2          | 0.574736528 | 7.015767367 | 3.541141934 | 1.98E-03 | 9.09E-03 | -2.126730353 |
| Lmnbl1        | 0.573656618 | 8.33251024  | 5.874581807 | 8.43E-06 | 1.26E-04 | 3.311163866  |
| Tacc3         | 0.571989368 | 7.704170081 | 4.15424275  | 4.64E-04 | 2.98E-03 | -0.701098628 |
| Cep55         | 0.570643689 | 6.104527312 | 2.797394527 | 1.09E-02 | 3.45E-02 | -3.771971116 |
| Topbp1        | 0.570574248 | 8.513326381 | 5.383779905 | 2.58E-05 | 2.99E-04 | 2.183942356  |
| Snora68       | 0.568341074 | 6.266093098 | 2.451565917 | 2.32E-02 | 6.18E-02 | -4.479987874 |
| Dpysl2        | 0.567533983 | 7.879435438 | 4.19200259  | 4.24E-04 | 2.77E-03 | -0.612356192 |
| Fbxo5         | 0.563265696 | 7.738206919 | 3.794226697 | 1.09E-03 | 5.79E-03 | -1.54274536  |
| Ccnb1         | 0.561616874 | 6.983603521 | 2.597659625 | 1.69E-02 | 4.85E-02 | -4.186580773 |
| Scd2          | 0.56006077  | 7.327463785 | 3.86900628  | 9.12E-04 | 5.02E-03 | -1.368774432 |
| Ppat          | 0.560025823 | 8.311824528 | 5.102871521 | 4.95E-05 | 4.98E-04 | 1.529855451  |
| Rhof          | 0.557019744 | 7.134903993 | 3.333683638 | 3.21E-03 | 1.33E-02 | -2.598218078 |
| LOC102634079  | 0.555150849 | 6.308990362 | 2.094442085 | 4.88E-02 | 1.09E-01 | -5.155631246 |
| Hspd1         | 0.555114399 | 10.00018943 | 4.802148257 | 1.00E-04 | 8.72E-04 | 0.824550748  |
| Nasp          | 0.554042952 | 8.464926462 | 5.370467564 | 2.66E-05 | 3.08E-04 | 2.153073536  |
| Mcm4          | 0.553747427 | 8.473777556 | 5.637260577 | 1.44E-05 | 1.92E-04 | 2.768894147  |
| Ckap2         | 0.553293086 | 5.61373894  | 3.293006996 | 3.53E-03 | 1.42E-02 | -2.689721941 |
| Sptssa        | 0.551074164 | 8.63194741  | 3.762103502 | 1.17E-03 | 6.15E-03 | -1.617303147 |
| Vrk1          | 0.546841659 | 8.933395091 | 5.669255174 | 1.34E-05 | 1.82E-04 | 2.842320521  |
| Ran           | 0.546503395 | 9.152434151 | 5.325249829 | 2.96E-05 | 3.29E-04 | 2.048119983  |
| Kif15         | 0.546040326 | 6.397428172 | 2.829514225 | 1.02E-02 | 3.27E-02 | -3.703983293 |
| Cenpf         | 0.545471657 | 5.955520099 | 3.923052406 | 8.02E-04 | 4.54E-03 | -1.242716704 |

|               |             |             |             |          |          |              |
|---------------|-------------|-------------|-------------|----------|----------|--------------|
| Pa2g4         | 0.54547045  | 10.35086929 | 4.496017938 | 2.06E-04 | 1.59E-03 | 0.103578686  |
| Gpatch4       | 0.545360795 | 6.599658701 | 3.455976988 | 2.41E-03 | 1.05E-02 | -2.321192413 |
| Pecam1        | 0.543729527 | 6.861937052 | 4.30380701  | 3.25E-04 | 2.28E-03 | -0.349290383 |
| Tfdp1         | 0.543596033 | 8.605353186 | 5.469025714 | 2.12E-05 | 2.62E-04 | 2.381274594  |
| Idh3a         | 0.54277828  | 5.973003123 | 2.250532777 | 3.55E-02 | 8.62E-02 | -4.868165268 |
| Ets2          | 0.541403241 | 6.114770552 | 2.192579787 | 4.00E-02 | 9.44E-02 | -4.976396405 |
| Klf20b        | 0.540902874 | 6.961430944 | 4.225513984 | 3.92E-04 | 2.62E-03 | -0.53355035  |
| Sdf2l1        | 0.540436652 | 8.648768234 | 4.1568018   | 4.61E-04 | 2.96E-03 | -0.695086359 |
| 2700094K13Rik | 0.53939467  | 9.542577716 | 5.453971345 | 2.20E-05 | 2.70E-04 | 2.346469068  |
| Spn           | 0.538721806 | 6.44509541  | 2.453833979 | 2.31E-02 | 6.16E-02 | -4.475502109 |
| Klf23         | 0.537446128 | 7.012581323 | 3.597945882 | 1.73E-03 | 8.20E-03 | -1.996398665 |
| Gstk1         | 0.534939355 | 6.017326542 | 2.608031095 | 1.66E-02 | 4.78E-02 | -4.165419348 |
| Dyrk3         | 0.534264173 | 6.053546435 | 3.109118748 | 5.39E-03 | 1.98E-02 | -3.098849731 |
| Dtd1          | 0.531502752 | 6.241813837 | 3.555180159 | 1.91E-03 | 8.90E-03 | -2.09456556  |
| Klf4          | 0.531263753 | 8.068468362 | 6.180756444 | 4.25E-06 | 7.03E-05 | 4.002047927  |
| Sae1          | 0.530761576 | 8.079304943 | 5.961944087 | 6.93E-06 | 1.07E-04 | 3.50933954   |
| Nme1          | 0.530457612 | 8.797112597 | 3.726815401 | 1.28E-03 | 6.54E-03 | -1.699075037 |
| Nt5c3b        | 0.530275954 | 6.25784932  | 2.478323203 | 2.19E-02 | 5.92E-02 | -4.426924187 |
| LOC102631525  | 0.526053708 | 7.015069863 | 2.30464526  | 3.17E-02 | 7.88E-02 | -4.765575325 |
| Prmt1         | 0.525139837 | 8.313782018 | 4.200316244 | 4.16E-04 | 2.73E-03 | -0.592809672 |
| D430020J02Rik | 0.524793639 | 6.267967899 | 2.736710225 | 1.25E-02 | 3.85E-02 | -3.899466018 |
| Lamtor4       | 0.523919189 | 8.438136959 | 3.297679515 | 3.49E-03 | 1.42E-02 | -2.679228136 |
| Lgals9        | 0.523064988 | 7.785499644 | 2.298263689 | 3.21E-02 | 7.97E-02 | -4.777749085 |
| Chek1         | 0.520337567 | 5.901866106 | 4.188649453 | 4.27E-04 | 2.78E-03 | -0.62023909  |
| Prc1          | 0.519988497 | 6.137332334 | 3.015120681 | 6.68E-03 | 2.35E-02 | -3.304774871 |
| Tfrc          | 0.519302822 | 7.153072695 | 2.684085656 | 1.40E-02 | 4.22E-02 | -4.008974253 |
| Atp5o         | 0.517456555 | 9.748730843 | 4.468348662 | 2.20E-04 | 1.66E-03 | 0.03836629   |
| Utp20         | 0.516768161 | 6.347473314 | 5.003257555 | 6.25E-05 | 5.98E-04 | 1.296705212  |
| Gins3         | 0.516308062 | 7.043052593 | 2.507882034 | 2.06E-02 | 5.62E-02 | -4.367945407 |
| Ncf2          | 0.516186818 | 8.233993957 | 3.63465485  | 1.59E-03 | 7.70E-03 | -1.911926861 |
| Krtcap2       | 0.515521632 | 9.686981593 | 5.177465376 | 4.16E-05 | 4.37E-04 | 1.704066255  |
| Nop58         | 0.515510408 | 8.659630321 | 4.120083545 | 5.03E-04 | 3.16E-03 | -0.78132324  |
| Dnajc9        | 0.51394903  | 8.619504314 | 6.93284293  | 8.32E-07 | 1.84E-05 | 5.651911606  |
| Bub1b         | 0.512855917 | 6.893234691 | 3.444852525 | 2.48E-03 | 1.07E-02 | -2.346504389 |
| Gen1          | 0.512753225 | 6.162161115 | 2.727028542 | 1.28E-02 | 3.91E-02 | -3.919687826 |
| Hn1l          | 0.509726903 | 7.756053008 | 4.876772535 | 8.41E-05 | 7.51E-04 | 0.999945268  |
| Rin2          | 0.508125062 | 5.804000711 | 2.779845768 | 1.13E-02 | 3.55E-02 | -3.808970531 |
| Cdc20         | 0.505504251 | 6.669799448 | 3.538614776 | 1.99E-03 | 9.12E-03 | -2.132517449 |
| Lifr          | 0.500800416 | 5.738064486 | 2.307775104 | 3.15E-02 | 7.84E-02 | -4.759597445 |
| Cdk4          | 0.499477256 | 8.464676801 | 4.345782289 | 2.94E-04 | 2.09E-03 | -0.250437154 |
| Hist1h2bn     | 0.499075982 | 10.43283997 | 3.220940903 | 4.17E-03 | 1.62E-02 | -2.850981276 |
| Trim59        | 0.496122415 | 7.628116091 | 2.167202915 | 4.21E-02 | 9.82E-02 | -5.02323963  |
| Set           | 0.490166327 | 7.539909817 | 4.046752288 | 5.98E-04 | 3.59E-03 | -0.953338138 |
| Prmt5         | 0.488977859 | 6.821657915 | 4.641379815 | 1.46E-04 | 1.20E-03 | 0.446119011  |
| Acss1         | 0.487893598 | 7.290714487 | 2.632600048 | 1.57E-02 | 4.58E-02 | -4.115122393 |
| Mrpl28        | 0.487467583 | 7.413976397 | 3.171346913 | 4.67E-03 | 1.77E-02 | -2.961280974 |
| Atic          | 0.487389386 | 8.426220159 | 2.663574309 | 1.47E-02 | 4.36E-02 | -4.051382224 |
| Eif4e3        | 0.484172774 | 7.801185562 | 3.455745359 | 2.41E-03 | 1.05E-02 | -2.321719666 |
| Klf14         | 0.482650303 | 5.953497357 | 2.759417715 | 1.19E-02 | 3.69E-02 | -3.851907883 |
| Cfp           | 0.481959516 | 7.736438303 | 3.509524934 | 2.13E-03 | 9.60E-03 | -2.199060317 |
| Snrpd3        | 0.481769567 | 9.813793417 | 4.142807103 | 4.77E-04 | 3.02E-03 | -0.727962025 |
| Ipo9          | 0.480560136 | 7.331686966 | 3.283856922 | 3.60E-03 | 1.44E-02 | -2.710258488 |
| Magohb        | 0.480018876 | 7.119054119 | 3.471727815 | 2.32E-03 | 1.03E-02 | -2.285317592 |
| Nop56         | 0.47955896  | 8.628420096 | 7.042513186 | 6.60E-07 | 1.53E-05 | 5.886477925  |
| Cenpe         | 0.479381054 | 6.877350117 | 4.130703304 | 4.90E-04 | 3.09E-03 | -0.756388244 |
| Raph1         | 0.478613744 | 7.024343745 | 5.033158516 | 5.83E-05 | 5.66E-04 | 1.366746349  |
| Hyou1         | 0.478486081 | 7.762261065 | 2.87009042  | 9.27E-03 | 3.05E-02 | -3.617613466 |
| Nfk           | 0.477271853 | 7.641157929 | 3.166784316 | 4.72E-03 | 1.78E-02 | -2.971399546 |
| Pdia4         | 0.476020293 | 8.242289352 | 4.110945714 | 5.14E-04 | 3.22E-03 | -0.802774134 |
| Pole4         | 0.475893927 | 7.197415939 | 3.326152165 | 3.26E-03 | 1.35E-02 | -2.615185745 |
| G6pdx         | 0.475715939 | 8.026289978 | 2.650671116 | 1.51E-02 | 4.44E-02 | -4.077979259 |
| Rcc2          | 0.475004098 | 7.189731297 | 3.731023805 | 1.26E-03 | 6.49E-03 | -1.689330542 |
| Uqcr11        | 0.473534712 | 9.758105032 | 3.712690313 | 1.32E-03 | 6.67E-03 | -1.73176623  |
| Iqgap2        | 0.473421836 | 8.002293327 | 2.128793319 | 4.55E-02 | 1.04E-01 | -5.093486624 |
| Sfxn1         | 0.473385125 | 6.838366897 | 3.605334945 | 1.70E-03 | 8.09E-03 | -1.979410608 |
| Rpn1          | 0.473071167 | 7.897951793 | 4.209382974 | 4.07E-04 | 2.69E-03 | -0.571489516 |
| Apex1         | 0.472753309 | 7.938799624 | 3.466659106 | 2.35E-03 | 1.03E-02 | -2.296866919 |
| Rrm2          | 0.471632318 | 6.449233412 | 2.272116487 | 3.39E-02 | 8.33E-02 | -4.827419724 |

|               |             |             |             |          |          |              |
|---------------|-------------|-------------|-------------|----------|----------|--------------|
| Mndal         | 0.469006383 | 8.763007765 | 3.756235994 | 1.19E-03 | 6.19E-03 | -1.630909473 |
| Gm15987       | 0.467836098 | 9.173930624 | 3.975315647 | 7.09E-04 | 4.09E-03 | -1.120589172 |
| Knstrn        | 0.467732058 | 6.958623656 | 4.142792312 | 4.77E-04 | 3.02E-03 | -0.727996767 |
| Mrpl9         | 0.467529508 | 7.668590327 | 3.467723489 | 2.35E-03 | 1.03E-02 | -2.294442026 |
| Mrpl14        | 0.467088374 | 8.028208314 | 3.206204191 | 4.31E-03 | 1.66E-02 | -2.88381575  |
| Ndufaf2       | 0.466786699 | 7.725851644 | 5.342106841 | 2.84E-05 | 3.20E-04 | 2.087264532  |
| Prps2         | 0.466323649 | 7.390724665 | 4.917250284 | 7.64E-05 | 6.99E-04 | 1.094992488  |
| Anxa2         | 0.463861285 | 10.57800886 | 6.619804237 | 1.63E-06 | 3.31E-05 | 4.973774831  |
| B4galt5       | 0.46290773  | 8.211726051 | 3.982502216 | 6.97E-04 | 4.04E-03 | -1.103779569 |
| Fkbp2         | 0.46242439  | 9.680905063 | 3.963782904 | 7.29E-04 | 4.17E-03 | -1.147556669 |
| Klf10         | 0.462423239 | 6.604197981 | 2.409969499 | 2.54E-02 | 6.61E-02 | -4.561851717 |
| Atp13a3       | 0.461203765 | 7.985150653 | 4.147677715 | 4.71E-04 | 3.01E-03 | -0.716521248 |
| Vdac1         | 0.460018307 | 9.240820141 | 5.041583661 | 5.71E-05 | 5.58E-04 | 1.386473191  |
| Ctps          | 0.457815494 | 6.459737716 | 3.625189342 | 1.62E-03 | 7.85E-03 | -1.933725922 |
| Vav3          | 0.455615094 | 7.245556563 | 2.775665799 | 1.15E-02 | 3.58E-02 | -3.817768016 |
| Zfp36l2       | 0.455437453 | 8.750356119 | 4.491856992 | 2.08E-04 | 1.60E-03 | 0.093771884  |
| Ttc27         | 0.454949148 | 6.09660865  | 3.175774578 | 4.62E-03 | 1.75E-02 | -2.951456918 |
| Tagln2        | 0.451485502 | 10.8969888  | 6.158900143 | 4.46E-06 | 7.28E-05 | 3.953075218  |
| Prmt7         | 0.451191991 | 6.513351759 | 2.964946322 | 7.48E-03 | 2.57E-02 | -3.413704756 |
| Nmral1        | 0.451007134 | 6.393974288 | 2.463920553 | 2.26E-02 | 6.05E-02 | -4.45525592  |
| Kdelr2        | 0.450770262 | 10.16988095 | 6.108161299 | 5.00E-06 | 8.05E-05 | 3.839176253  |
| Nucks1        | 0.44986481  | 8.753800926 | 5.792402015 | 1.02E-05 | 1.45E-04 | 3.124019435  |
| Fam103a1      | 0.447285454 | 7.201749249 | 2.204983991 | 3.89E-02 | 9.27E-02 | -4.953376443 |
| Snrpd1        | 0.445703914 | 8.995198001 | 3.830421302 | 9.99E-04 | 5.40E-03 | -1.458608837 |
| Cry1          | 0.445353175 | 6.304864079 | 2.081893903 | 5.00E-02 | 1.12E-01 | -5.178169187 |
| Lta4h         | 0.442905744 | 8.071077853 | 4.532597254 | 1.89E-04 | 1.49E-03 | 0.189790427  |
| Fanca         | 0.44243621  | 5.926878605 | 3.425862258 | 2.59E-03 | 1.12E-02 | -2.38966381  |
| Uck2          | 0.440771761 | 6.607527817 | 2.53270992  | 1.95E-02 | 5.40E-02 | -4.318120576 |
| Sssca1        | 0.440536513 | 7.475136068 | 4.238183054 | 3.80E-04 | 2.57E-03 | -0.503747008 |
| Smyd5         | 0.440068416 | 6.031133565 | 2.397129222 | 2.61E-02 | 6.74E-02 | -4.586964655 |
| Polr1e        | 0.438095297 | 6.046992013 | 3.370776043 | 2.94E-03 | 1.24E-02 | -2.514489749 |
| Snmp25        | 0.437082335 | 9.09904644  | 3.068212466 | 5.92E-03 | 2.12E-02 | -3.188751894 |
| Ehd4          | 0.436670285 | 6.895175965 | 3.394912169 | 2.78E-03 | 1.19E-02 | -2.459865997 |
| Bzw2          | 0.436502418 | 7.594191642 | 2.685192627 | 1.40E-02 | 4.21E-02 | -4.006681105 |
| Klrd1         | 0.435254327 | 8.063558152 | 2.212680365 | 3.83E-02 | 9.14E-02 | -4.939053142 |
| Nup205        | 0.433863043 | 7.367519451 | 4.400329105 | 2.59E-04 | 1.88E-03 | -0.121929295 |
| Ubap2         | 0.43370218  | 8.716053896 | 4.667169132 | 1.38E-04 | 1.14E-03 | 0.506864217  |
| Tomm5         | 0.433425736 | 7.026994105 | 2.142011221 | 4.43E-02 | 1.02E-01 | -5.069402237 |
| Anp32e        | 0.431637116 | 7.902049104 | 3.980589518 | 7.00E-04 | 4.05E-03 | -1.108253794 |
| Kars          | 0.431019694 | 9.035525158 | 5.833183665 | 9.26E-06 | 1.35E-04 | 3.216976017  |
| Mthfd1        | 0.430585559 | 6.274285845 | 2.514237118 | 2.03E-02 | 5.57E-02 | -4.355216588 |
| B3gnt5        | 0.429683824 | 5.861956962 | 2.622733419 | 1.60E-02 | 4.66E-02 | -4.135349269 |
| Sdhc          | 0.428901964 | 8.447859503 | 3.52646383  | 2.04E-03 | 9.30E-03 | -2.160328846 |
| Naa10         | 0.428207427 | 7.4975416   | 2.109415756 | 4.73E-02 | 1.07E-01 | -5.128622337 |
| Dnajc25       | 0.428096798 | 6.764892148 | 2.648955865 | 1.52E-02 | 4.45E-02 | -4.081510123 |
| 0610010K14Rik | 0.427434664 | 7.984032003 | 2.858984065 | 9.51E-03 | 3.10E-02 | -3.641306822 |
| Padi2         | 0.426531133 | 6.734578723 | 2.83730201  | 9.98E-03 | 3.22E-02 | -3.687447595 |
| Rgs14         | 0.425558942 | 6.240981566 | 2.47566391  | 2.21E-02 | 5.94E-02 | -4.432211897 |
| Ube2s         | 0.42475329  | 10.14046106 | 3.19620089  | 4.41E-03 | 1.69E-02 | -2.906075547 |
| Emp3          | 0.424613412 | 9.850826433 | 3.859357987 | 9.33E-04 | 5.11E-03 | -1.39125094  |
| Mbnl3         | 0.424520975 | 7.314900856 | 3.578959395 | 1.81E-03 | 8.47E-03 | -2.040014362 |
| Lpcat4        | 0.423922199 | 8.087878002 | 4.360897359 | 2.84E-04 | 2.03E-03 | -0.214831998 |
| Nol11         | 0.42349914  | 7.123120373 | 2.525530531 | 1.98E-02 | 5.46E-02 | -4.332554742 |
| Aldh9a1       | 0.422969514 | 7.939045981 | 4.145190064 | 4.74E-04 | 3.02E-03 | -0.72236473  |
| Atf5          | 0.421912673 | 6.745089214 | 3.164507099 | 4.74E-03 | 1.79E-02 | -2.976447924 |
| Dis3          | 0.42013595  | 6.867589886 | 2.855843058 | 9.57E-03 | 3.12E-02 | -3.64800045  |
| Lbh           | 0.418351065 | 10.97657183 | 5.112435661 | 4.84E-05 | 4.89E-04 | 1.552211115  |
| Pdia6         | 0.417655541 | 9.012691465 | 2.72802148  | 1.27E-02 | 3.91E-02 | -3.917615445 |
| Etfb          | 0.417614198 | 9.073510347 | 4.210707871 | 4.06E-04 | 2.68E-03 | -0.568373796 |
| Eef1e1        | 0.416577411 | 7.426649589 | 2.283681975 | 3.31E-02 | 8.17E-02 | -4.805490908 |
| Rpa2          | 0.415769291 | 7.274297115 | 2.545922828 | 1.90E-02 | 5.27E-02 | -4.291500185 |
| Athl1         | 0.415694095 | 6.309804941 | 2.648389956 | 1.52E-02 | 4.45E-02 | -4.082674806 |
| Smc3          | 0.414741259 | 9.351918591 | 5.827306923 | 9.38E-06 | 1.37E-04 | 3.20359115   |
| Fasn          | 0.412079684 | 7.242576655 | 3.6456139   | 1.55E-03 | 7.54E-03 | -1.886673097 |
| Gspt1         | 0.412045836 | 8.182397338 | 2.765125882 | 1.17E-02 | 3.65E-02 | -3.839924489 |
| Isyna1        | 0.411697443 | 6.910294819 | 3.446408183 | 2.47E-03 | 1.07E-02 | -2.342966023 |
| Ruvbl2        | 0.408419927 | 7.877198794 | 3.293185036 | 3.52E-03 | 1.42E-02 | -2.689322171 |
| Dbf4          | 0.408158221 | 7.068987923 | 4.010524294 | 6.52E-04 | 3.86E-03 | -1.038200028 |

|           |              |             |             |          |          |              |
|-----------|--------------|-------------|-------------|----------|----------|--------------|
| Nccrp1    | 0.407477139  | 6.655291153 | 2.611434403 | 1.64E-02 | 4.75E-02 | -4.158466202 |
| Mrpl12    | 0.404789278  | 8.740856678 | 3.112552606 | 5.35E-03 | 1.97E-02 | -3.091283436 |
| Tmem50b   | 0.404508993  | 8.526738975 | 3.528184029 | 2.04E-03 | 9.27E-03 | -2.156393008 |
| Mycbp     | 0.403847053  | 7.872536434 | 2.993796193 | 7.01E-03 | 2.43E-02 | -3.351158114 |
| Zcchc24   | 0.403263095  | 6.169388032 | 2.433548092 | 2.41E-02 | 6.34E-02 | -4.515542699 |
| Lsm7      | 0.402798857  | 9.223519015 | 2.194454877 | 3.98E-02 | 9.42E-02 | -4.97292173  |
| Ndufaf4   | 0.402582286  | 6.9113349   | 2.272386697 | 3.39E-02 | 8.33E-02 | -4.826908147 |
| Tubgcp2   | 0.401627751  | 7.832134398 | 3.82687493  | 1.01E-03 | 5.43E-03 | -1.466858406 |
| Ostc      | 0.401422084  | 8.612321925 | 4.184809266 | 4.31E-04 | 2.80E-03 | -0.629266436 |
| Ercc6l    | 0.398298966  | 6.825063585 | 2.274195356 | 3.38E-02 | 8.31E-02 | -4.823482962 |
| Vdac3     | 0.397873378  | 7.494490208 | 2.256588842 | 3.50E-02 | 8.54E-02 | -4.856756264 |
| Nup62     | 0.397615435  | 10.83653911 | 5.346357218 | 2.82E-05 | 3.19E-04 | 2.097131156  |
| Ak6       | 0.397579301  | 8.207344207 | 2.294698126 | 3.24E-02 | 8.02E-02 | -4.78454224  |
| Mthfd1l   | 0.397344367  | 6.283367817 | 2.123831083 | 4.60E-02 | 1.05E-01 | -5.102503808 |
| Nucb2     | 0.397283231  | 8.607871551 | 2.752172729 | 1.21E-02 | 3.75E-02 | -3.867101273 |
| Runx2     | 0.396163039  | 8.177669998 | 3.311971855 | 3.37E-03 | 1.38E-02 | -2.647101615 |
| Sqle      | 0.393371473  | 7.309741972 | 2.543384934 | 1.91E-02 | 5.30E-02 | -4.296618935 |
| Spc25     | 0.393280954  | 6.421271441 | 2.554167525 | 1.86E-02 | 5.21E-02 | -4.274852979 |
| Spcs3     | 0.392618767  | 9.383002655 | 5.363447486 | 2.71E-05 | 3.09E-04 | 2.136789729  |
| Mybbp1a   | 0.392383635  | 7.535336552 | 3.135590456 | 5.07E-03 | 1.89E-02 | -3.040444557 |
| Heatr5a   | 0.391841281  | 7.427991262 | 4.674832368 | 1.35E-04 | 1.12E-03 | 0.524912141  |
| L1cam     | 0.3909768    | 6.522586459 | 2.434546798 | 2.41E-02 | 6.33E-02 | -4.51357571  |
| Spdl1     | 0.389761246  | 7.63771356  | 4.225488166 | 3.92E-04 | 2.62E-03 | -0.533611081 |
| Copz1     | 0.38926556   | 8.832379727 | 3.729893715 | 1.27E-03 | 6.50E-03 | -1.69194745  |
| C1qbp     | 0.388654164  | 8.622356557 | 3.986576374 | 6.90E-04 | 4.03E-03 | -1.094248329 |
| Hsd17b12  | 0.388197784  | 7.968276626 | 3.288484886 | 3.56E-03 | 1.44E-02 | -2.699873617 |
| Cope      | 0.387340673  | 9.429892984 | 3.719654297 | 1.30E-03 | 6.60E-03 | -1.715651692 |
| H1f0      | 0.386994176  | 9.316212284 | 3.11178037  | 5.36E-03 | 1.97E-02 | -3.092985271 |
| Twf2      | 0.386891343  | 8.735840362 | 3.115356319 | 5.31E-03 | 1.96E-02 | -3.085103421 |
| Ptpro     | 0.384313036  | 6.646402938 | 2.50931451  | 2.05E-02 | 5.62E-02 | -4.365077739 |
| Lman1     | 0.383600573  | 8.068961671 | 2.109857417 | 4.73E-02 | 1.07E-01 | -5.127823807 |
| Cdca7l    | 0.381541618  | 6.795128755 | 2.491510891 | 2.13E-02 | 5.79E-02 | -4.400656914 |
| Dna2      | 0.381376147  | 7.774422339 | 2.249033623 | 3.56E-02 | 8.64E-02 | -4.870986666 |
| Arhgdib   | 0.379937565  | 10.57902611 | 5.886490394 | 8.21E-06 | 1.23E-04 | 3.338225055  |
| Mar2      | 0.378385197  | 8.710773797 | 4.521160741 | 1.94E-04 | 1.53E-03 | 0.162836686  |
| Ppp2r4    | 0.378253132  | 7.941475074 | 2.79688514  | 1.09E-02 | 3.45E-02 | -3.773046608 |
| Cluh      | 0.377729197  | 6.697306366 | 2.131278408 | 4.53E-02 | 1.04E-01 | -5.088965774 |
| Hist1h2bl | 0.377608925  | 10.89743868 | 3.792331885 | 1.09E-03 | 5.80E-03 | -1.547146264 |
| Whsc1     | 0.3776334997 | 8.342371218 | 4.795659675 | 1.02E-04 | 8.81E-04 | 0.809290982  |
| Iars      | 0.376288715  | 8.07428721  | 4.499257636 | 2.05E-04 | 1.58E-03 | 0.111214229  |
| Lymr4     | 0.376015724  | 7.306610585 | 2.623099402 | 1.60E-02 | 4.66E-02 | -4.134599665 |
| Fkbp3     | 0.37557873   | 8.858164502 | 3.890518526 | 8.67E-04 | 4.80E-03 | -1.318629479 |
| Nolc1     | 0.374791055  | 8.129528095 | 3.070953072 | 5.88E-03 | 2.11E-02 | -3.182742283 |
| Zfp414    | 0.37455072   | 8.581325737 | 3.493727612 | 2.21E-03 | 9.88E-03 | -2.235140099 |
| Ept1      | 0.373863053  | 7.671363457 | 3.28581944  | 3.58E-03 | 1.44E-02 | -2.705855265 |
| Ndufc1    | 0.373197892  | 9.677172367 | 3.404569313 | 2.72E-03 | 1.16E-02 | -2.437980015 |
| Hpse      | 0.373134207  | 7.745905087 | 3.425860705 | 2.59E-03 | 1.12E-02 | -2.389667337 |
| Snrpa1    | 0.371671019  | 8.645691761 | 2.953220541 | 7.69E-03 | 2.63E-02 | -3.439057551 |
| Thrap3    | 0.371233217  | 9.223363338 | 2.309738897 | 3.14E-02 | 7.82E-02 | -4.755844246 |
| Flna      | 0.370924055  | 9.697425211 | 4.09885295  | 5.29E-04 | 3.29E-03 | -0.831154992 |
| Prdx1     | 0.370864113  | 8.674054576 | 2.151523855 | 4.34E-02 | 1.00E-01 | -5.052010781 |
| Anxa1     | 0.370625885  | 8.531892019 | 3.469819402 | 2.34E-03 | 1.03E-02 | -2.289666522 |
| Mri1      | 0.370589145  | 6.586380692 | 2.346411377 | 2.90E-02 | 7.37E-02 | -4.685414626 |
| Syne2     | 0.370495932  | 6.554340539 | 2.927336081 | 8.15E-03 | 2.75E-02 | -3.494879859 |
| Noc2l     | 0.370110846  | 8.100415156 | 3.772720243 | 1.15E-03 | 6.03E-03 | -1.592674052 |
| Naa50     | 0.369941467  | 9.873600921 | 5.671494813 | 1.34E-05 | 1.82E-04 | 2.847456797  |
| Prmt3     | 0.369843773  | 6.812243127 | 3.871427681 | 9.07E-04 | 5.00E-03 | -1.363132234 |
| Cd3eap    | 0.369675769  | 6.299352577 | 3.116251519 | 5.30E-03 | 1.96E-02 | -3.083129782 |
| Kti12     | 0.368723279  | 7.035665745 | 2.815838872 | 1.05E-02 | 3.36E-02 | -3.732971818 |
| Gatc      | 0.365737456  | 7.404293477 | 2.342224689 | 2.93E-02 | 7.41E-02 | -4.693487676 |
| Uchl3     | 0.363947202  | 8.201967752 | 2.676946584 | 1.42E-02 | 4.28E-02 | -4.023752314 |
| Clns1a    | 0.363555191  | 8.521679665 | 2.87559195  | 9.16E-03 | 3.03E-02 | -3.605862495 |
| Sigmar1   | 0.363274322  | 7.008433043 | 2.599241773 | 1.69E-02 | 4.84E-02 | -4.183355377 |
| Ipo5      | 0.363120452  | 8.195369606 | 3.116271401 | 5.30E-03 | 1.96E-02 | -3.083085946 |
| Tuba4a    | 0.363058122  | 9.091270957 | 3.694873976 | 1.38E-03 | 6.88E-03 | -1.772966341 |
| Frrs1     | 0.36301682   | 6.398355441 | 2.616576195 | 1.63E-02 | 4.71E-02 | -4.147952648 |
| Rbm38     | 0.362159271  | 8.380431812 | 3.061457327 | 6.01E-03 | 2.14E-02 | -3.203556124 |
| Dbi       | 0.36002393   | 9.875933835 | 3.750374801 | 1.21E-03 | 6.24E-03 | -1.644497321 |

|               |             |             |             |          |          |              |
|---------------|-------------|-------------|-------------|----------|----------|--------------|
| Dpagt1        | 0.359583493 | 8.444745631 | 4.411885948 | 2.52E-04 | 1.84E-03 | -0.094697097 |
| 2700029M09Rik | 0.358432702 | 8.698459774 | 4.407069034 | 2.55E-04 | 1.85E-03 | -0.106047709 |
| Ttc37         | 0.357725067 | 6.787021524 | 3.072752979 | 5.86E-03 | 2.10E-02 | -3.178794368 |
| Srsf1         | 0.356770342 | 8.999450196 | 3.089117895 | 5.64E-03 | 2.05E-02 | -3.142860766 |
| Prss30        | 0.355463887 | 6.017274107 | 2.375229668 | 2.73E-02 | 7.01E-02 | -4.629621315 |
| Acaa2         | 0.354575927 | 7.408279496 | 3.247554762 | 3.92E-03 | 1.55E-02 | -2.791560133 |
| Ltv1          | 0.353823094 | 7.799079234 | 2.675269197 | 1.43E-02 | 4.28E-02 | -4.027221806 |
| Hdac9         | 0.353719615 | 5.968537578 | 2.789565397 | 1.11E-02 | 3.49E-02 | -3.788490808 |
| Rfc1          | 0.352307949 | 7.965233286 | 3.018392697 | 6.63E-03 | 2.33E-02 | -3.297646638 |
| Dtymk         | 0.352217131 | 7.80674548  | 2.572369921 | 1.79E-02 | 5.05E-02 | -4.238001702 |
| Tcf4          | 0.35084356  | 8.23638794  | 2.79880799  | 1.09E-02 | 3.44E-02 | -3.768986516 |
| Cxcr4         | 0.350546899 | 8.758485541 | 3.545357042 | 1.96E-03 | 9.04E-03 | -2.11707573  |
| Casp1         | 0.350103115 | 8.469603928 | 4.130573575 | 4.91E-04 | 3.09E-03 | -0.75669288  |
| Sf3b5         | 0.350076904 | 9.730834822 | 4.872463515 | 8.49E-05 | 7.54E-04 | 0.989823154  |
| Oaz1          | 0.349263813 | 9.50504057  | 2.445672498 | 2.35E-02 | 6.23E-02 | -4.491633257 |
| Serp1         | 0.348797427 | 8.719306807 | 3.536795835 | 2.00E-03 | 9.14E-03 | -2.136682145 |
| Txnkc5        | 0.34862913  | 7.398265358 | 2.24036081  | 3.62E-02 | 8.75E-02 | -4.887286528 |
| Tmpo          | 0.348595669 | 8.733536691 | 4.652328707 | 1.43E-04 | 1.17E-03 | 0.471909915  |
| Ict1          | 0.346426099 | 8.004206762 | 2.553459307 | 1.87E-02 | 5.22E-02 | -4.276284063 |
| Tram1         | 0.345940068 | 9.937451896 | 4.362787424 | 2.83E-04 | 2.03E-03 | -0.210379469 |
| Mif           | 0.34510199  | 10.93337379 | 2.952310949 | 7.70E-03 | 2.63E-02 | -3.441022536 |
| Trmt112       | 0.344947533 | 8.077911018 | 2.255358782 | 3.51E-02 | 8.55E-02 | -4.859075065 |
| Ldlr          | 0.344613527 | 7.415915726 | 3.014264947 | 6.69E-03 | 2.35E-02 | -3.306638638 |
| Manf          | 0.343682142 | 7.494804591 | 3.689003484 | 1.40E-03 | 6.94E-03 | -1.786533294 |
| Ccnd1         | 0.343138575 | 9.549727089 | 3.788378189 | 1.10E-03 | 5.83E-03 | -1.556327932 |
| Hspa9         | 0.342217454 | 8.686977268 | 5.326537682 | 2.95E-05 | 3.29E-04 | 2.051111329  |
| Prelid1       | 0.341626341 | 9.648274455 | 3.218916989 | 4.19E-03 | 1.62E-02 | -2.855493624 |
| Map2k3        | 0.340310152 | 7.959959013 | 2.941010482 | 7.90E-03 | 2.68E-02 | -3.465414508 |
| Ndufb6        | 0.340040849 | 9.80983814  | 3.672128971 | 1.45E-03 | 7.17E-03 | -1.825507024 |
| Slc35c1       | 0.339893628 | 7.324697813 | 2.580372557 | 1.76E-02 | 4.99E-02 | -4.221757778 |
| Rel1          | 0.339647378 | 7.604468128 | 2.468125266 | 2.24E-02 | 6.02E-02 | -4.447185006 |
| Snx30         | 0.338103216 | 7.282775689 | 2.599816681 | 1.69E-02 | 4.83E-02 | -4.182183115 |
| Tbrg4         | 0.335304299 | 7.34630806  | 2.560269989 | 1.84E-02 | 5.16E-02 | -4.262513354 |
| Ftsj3         | 0.333587249 | 7.27137769  | 2.22542001  | 3.73E-02 | 8.94E-02 | -4.91527686  |
| Anapc5        | 0.333199882 | 9.669393313 | 4.092899825 | 5.36E-04 | 3.31E-03 | -0.845123678 |
| Gars          | 0.332962154 | 8.946203026 | 4.41750127  | 2.48E-04 | 1.82E-03 | -0.081464809 |
| Me2           | 0.332841625 | 8.91666079  | 4.053940384 | 5.88E-04 | 3.54E-03 | -0.936490562 |
| Rbfa          | 0.332566897 | 7.665539823 | 2.804312087 | 1.07E-02 | 3.42E-02 | -3.757357766 |
| Fh1           | 0.332221343 | 8.201755828 | 2.935493851 | 8.00E-03 | 2.71E-02 | -3.477308364 |
| Larp7         | 0.332048591 | 7.61286599  | 3.207726257 | 4.29E-03 | 1.66E-02 | -2.880426763 |
| Mrpl33        | 0.331994293 | 9.323604793 | 3.90891215  | 8.30E-04 | 4.63E-03 | -1.275721815 |
| Pcna          | 0.329874502 | 10.98498825 | 4.149743697 | 4.69E-04 | 3.00E-03 | -0.711668044 |
| Noa1          | 0.329780916 | 7.191941466 | 2.47747227  | 2.20E-02 | 5.93E-02 | -4.428616505 |
| Fkbp4         | 0.329701509 | 8.024314456 | 2.12846708  | 4.55E-02 | 1.04E-01 | -5.094079866 |
| Ak2           | 0.329064282 | 8.734626125 | 3.525034117 | 2.05E-03 | 9.32E-03 | -2.163599694 |
| Hcfc1         | 0.327712423 | 8.900663113 | 3.921156976 | 8.06E-04 | 4.54E-03 | -1.247141836 |
| I830077J02Rik | 0.327435882 | 8.557607012 | 2.708457517 | 1.33E-02 | 4.04E-02 | -3.958382643 |
| Alg8          | 0.327060661 | 8.296483449 | 3.00641224  | 6.81E-03 | 2.38E-02 | -3.323732118 |
| Hprt          | 0.326951445 | 8.745739891 | 3.328452334 | 3.25E-03 | 1.34E-02 | -2.610004892 |
| Cct6a         | 0.32671889  | 8.910795952 | 3.833091428 | 9.93E-04 | 5.38E-03 | -1.452396775 |
| Prep          | 0.326586303 | 7.648154436 | 2.719049461 | 1.30E-02 | 3.97E-02 | -3.936328328 |
| Anp32b        | 0.32604625  | 9.530335772 | 2.633165438 | 1.57E-02 | 4.58E-02 | -4.11396219  |
| Ptpn12        | 0.325404363 | 8.38912839  | 3.805983348 | 1.06E-03 | 5.66E-03 | -1.515430932 |
| Mrps12        | 0.325213318 | 8.937340406 | 2.960336597 | 7.56E-03 | 2.59E-02 | -3.42367642  |
| Tmem147       | 0.324625267 | 7.728351434 | 3.096205311 | 5.55E-03 | 2.02E-02 | -3.12727691  |
| Pitpna        | 0.323747855 | 9.622120839 | 3.545920395 | 1.95E-03 | 9.04E-03 | -2.115785174 |
| Klf3          | 0.322292867 | 9.146957941 | 2.573203722 | 1.79E-02 | 5.05E-02 | -4.236310435 |
| Exosc1        | 0.322022929 | 7.806353045 | 4.199354558 | 4.17E-04 | 2.73E-03 | -0.595070864 |
| 2810428I15Rik | 0.320636075 | 8.847852183 | 3.895820817 | 8.56E-04 | 4.75E-03 | -1.306263572 |
| Il17ra        | 0.320180025 | 8.688023485 | 2.805725985 | 1.07E-02 | 3.41E-02 | -3.754368923 |
| Bak1          | 0.319712553 | 10.2180028  | 3.458293661 | 2.40E-03 | 1.05E-02 | -2.315918503 |
| Dcps          | 0.319367704 | 7.928724614 | 3.282015758 | 3.62E-03 | 1.45E-02 | -2.714388698 |
| Gramd4        | 0.319260559 | 7.314102902 | 2.919569669 | 8.29E-03 | 2.79E-02 | -3.511589796 |
| Txn2          | 0.319209109 | 8.461302864 | 2.508641737 | 2.06E-02 | 5.62E-02 | -4.366424668 |
| Plp2          | 0.317179105 | 10.66565248 | 2.447523551 | 2.34E-02 | 6.21E-02 | -4.487977231 |
| Psp1          | 0.315921776 | 8.807663079 | 4.194834351 | 4.21E-04 | 2.75E-03 | -0.605698647 |
| Immt          | 0.315375489 | 8.491685294 | 3.226712635 | 4.11E-03 | 1.60E-02 | -2.83810805  |
| Cct3          | 0.313377762 | 8.072976821 | 3.542747519 | 1.97E-03 | 9.08E-03 | -2.123053112 |

|           |             |             |             |          |          |              |
|-----------|-------------|-------------|-------------|----------|----------|--------------|
| Tomm6     | 0.312464892 | 10.08375717 | 3.451094372 | 2.44E-03 | 1.06E-02 | -2.332304677 |
| Ndufs6    | 0.312174913 | 10.93200461 | 3.184942031 | 4.53E-03 | 1.72E-02 | -2.931101559 |
| Zfp367    | 0.309995748 | 7.734106861 | 2.425403294 | 2.46E-02 | 6.43E-02 | -4.531567545 |
| Smim4     | 0.309401695 | 7.683069322 | 2.185359696 | 4.05E-02 | 9.53E-02 | -4.98975854  |
| Pcyt1a    | 0.306760632 | 7.701833456 | 2.500403584 | 2.09E-02 | 5.69E-02 | -4.382902385 |
| Emg1      | 0.306729946 | 8.994635374 | 4.170589694 | 4.46E-04 | 2.89E-03 | -0.66268786  |
| Gnl3      | 0.306376655 | 8.009938235 | 2.522259734 | 2.00E-02 | 5.49E-02 | -4.339123558 |
| Nrros     | 0.306237629 | 8.923187298 | 4.788036056 | 1.04E-04 | 8.93E-04 | 0.791360117  |
| Slc25a12  | 0.306113638 | 8.382688905 | 3.966178796 | 7.24E-04 | 4.16E-03 | -1.141955069 |
| Nceh1     | 0.304946836 | 6.857937413 | 2.170207399 | 4.18E-02 | 9.77E-02 | -5.017711419 |
| Eif2s1    | 0.303032228 | 8.71498893  | 3.343987626 | 3.13E-03 | 1.30E-02 | -2.574985945 |
| Ssrp1     | 0.302842317 | 7.813491905 | 2.428030534 | 2.44E-02 | 6.40E-02 | -4.526401707 |
| Smc6      | 0.302810926 | 9.43683015  | 3.460283098 | 2.39E-03 | 1.05E-02 | -2.311388812 |
| Arl6ip5   | 0.302649665 | 8.633088863 | 3.129284605 | 5.14E-03 | 1.91E-02 | -3.054373148 |
| Sass6     | 0.30258786  | 7.387408582 | 2.314855192 | 3.10E-02 | 7.76E-02 | -4.746057204 |
| Atrnl1    | 0.302315897 | 7.620135965 | 2.112294871 | 4.70E-02 | 1.06E-01 | -5.123414909 |
| Idh3g     | 0.301421483 | 9.883362579 | 4.022025349 | 6.35E-04 | 3.78E-03 | -1.011268757 |
| Phpt1     | 0.300672363 | 8.603423087 | 3.147943154 | 4.93E-03 | 1.85E-02 | -3.013131138 |
| Lrpprc    | 0.300535099 | 7.295646962 | 3.070853442 | 5.88E-03 | 2.11E-02 | -3.182960788 |
| Gng10     | 0.300111077 | 9.579819918 | 2.449309227 | 2.33E-02 | 6.20E-02 | -4.484448898 |
| Uqcrq     | 0.30011006  | 9.983952704 | 2.684912734 | 1.40E-02 | 4.21E-02 | -4.007260961 |
| Sreb2     | 0.297838644 | 9.669078356 | 4.340732724 | 2.98E-04 | 2.12E-03 | -0.262331002 |
| Cpsf2     | 0.297549321 | 8.289097167 | 3.247745719 | 3.92E-03 | 1.55E-02 | -2.791133216 |
| Pigt      | 0.295959185 | 8.614754473 | 2.903941208 | 8.59E-03 | 2.88E-02 | -3.545159964 |
| Wdr3      | 0.295063861 | 7.507355817 | 3.365924315 | 2.98E-03 | 1.25E-02 | -2.525456656 |
| Heatr1    | 0.294540061 | 7.506136066 | 3.362624812 | 3.00E-03 | 1.26E-02 | -2.53291232  |
| Slc35b1   | 0.294199696 | 8.988351259 | 2.364452291 | 2.80E-02 | 7.12E-02 | -4.650532282 |
| E2f4      | 0.293987422 | 8.31906059  | 3.080985495 | 5.75E-03 | 2.08E-02 | -3.160726361 |
| Stt3b     | 0.293468477 | 7.959908335 | 2.435978569 | 2.40E-02 | 6.32E-02 | -4.51075501  |
| Ndufb7    | 0.292177645 | 10.66961468 | 3.785961951 | 1.11E-03 | 5.86E-03 | -1.561938351 |
| Ndufaf7   | 0.291076809 | 7.349962194 | 2.405013685 | 2.57E-02 | 6.66E-02 | -4.571553162 |
| Smdt1     | 0.290566473 | 10.4821889  | 3.593505035 | 1.75E-03 | 8.26E-03 | -2.006604806 |
| Nsf1c     | 0.290015389 | 9.625860581 | 3.904502886 | 8.38E-04 | 4.67E-03 | -1.286010153 |
| Noc4l     | 0.289444524 | 6.679838326 | 2.587435558 | 1.73E-02 | 4.94E-02 | -4.207399831 |
| Rpn2      | 0.289057975 | 8.796089204 | 3.107505194 | 5.41E-03 | 1.98E-02 | -3.10240407  |
| Etf2dh    | 0.28695587  | 8.40496869  | 2.466169895 | 2.25E-02 | 6.04E-02 | -4.451064693 |
| Arhgap11a | 0.28683143  | 8.113835898 | 2.463991551 | 2.26E-02 | 6.05E-02 | -4.455384824 |
| Hmgcs1    | 0.285788348 | 8.270747815 | 2.470119316 | 2.23E-02 | 6.00E-02 | -4.443226862 |
| Ssh2      | 0.284312601 | 8.003402261 | 3.080114202 | 5.76E-03 | 2.08E-02 | -3.162639435 |
| Lsm4      | 0.284044677 | 9.095897235 | 2.658158199 | 1.48E-02 | 4.39E-02 | -4.06255397  |
| Alkbh6    | 0.283537271 | 7.731434324 | 2.524816997 | 1.98E-02 | 5.46E-02 | -4.333988128 |
| Rbl1      | 0.283392328 | 8.340940102 | 3.656624828 | 1.51E-03 | 7.40E-03 | -1.861283741 |
| Cops6     | 0.283190262 | 9.62590851  | 2.367098069 | 2.78E-02 | 7.10E-02 | -4.645403788 |
| Rexo2     | 0.281972597 | 8.982996381 | 2.741916791 | 1.23E-02 | 3.82E-02 | -3.888577495 |
| Ints7     | 0.281405535 | 7.460114385 | 2.942672159 | 7.87E-03 | 2.68E-02 | -3.461830159 |
| Ndufa9    | 0.280790794 | 8.730402779 | 3.956841619 | 7.41E-04 | 4.23E-03 | -1.163782959 |
| Tspo      | 0.279408486 | 9.315990539 | 2.368852967 | 2.77E-02 | 7.08E-02 | -4.642000344 |
| Prkd3     | 0.278998244 | 7.348369237 | 2.817680301 | 1.04E-02 | 3.35E-02 | -3.729072018 |
| Ube2l3    | 0.278501959 | 9.562109471 | 2.171004953 | 4.18E-02 | 9.76E-02 | -5.016243125 |
| Eif3b     | 0.278290758 | 8.430748391 | 3.322777342 | 3.29E-03 | 1.35E-02 | -2.6227852   |
| Tiam1     | 0.278065758 | 7.418402708 | 2.540700792 | 1.92E-02 | 5.32E-02 | -4.30202977  |
| Cse1l     | 0.277114179 | 8.834863432 | 3.62210318  | 1.63E-03 | 7.88E-03 | -1.940830713 |
| Ahsa1     | 0.275906575 | 9.544638363 | 2.083100711 | 4.99E-02 | 1.12E-01 | -5.176005448 |
| Psmc5     | 0.275584148 | 10.19100178 | 3.234444646 | 4.04E-03 | 1.58E-02 | -2.820850946 |
| Nat10     | 0.275350813 | 6.550623892 | 2.315312972 | 3.10E-02 | 7.76E-02 | -4.74518089  |
| Coro7     | 0.274623219 | 8.811223326 | 2.318827518 | 3.08E-02 | 7.73E-02 | -4.738449743 |
| Plekhhg3  | 0.274158741 | 6.186037572 | 2.11838975  | 4.65E-02 | 1.05E-01 | -5.112376123 |
| Arl6ip4   | 0.273761365 | 9.221707545 | 3.320841761 | 3.30E-03 | 1.36E-02 | -2.627142724 |
| Cebpg     | 0.273693404 | 8.705414741 | 2.947793657 | 7.78E-03 | 2.65E-02 | -3.450777601 |
| Rsl1d1    | 0.273399719 | 9.146633681 | 3.750606508 | 1.21E-03 | 6.24E-03 | -1.643960234 |
| Nars      | 0.27334719  | 9.679719553 | 3.966090111 | 7.25E-04 | 4.16E-03 | -1.142162422 |
| Cldn25    | 0.273145905 | 8.85698214  | 2.190096357 | 4.02E-02 | 9.47E-02 | -4.980995545 |
| Mrpl16    | 0.272487171 | 7.787653503 | 2.994334211 | 7.00E-03 | 2.43E-02 | -3.349989433 |
| Vps36     | 0.272421694 | 8.234588843 | 3.513492209 | 2.11E-03 | 9.53E-03 | -2.189993069 |
| Depdc5    | 0.27198895  | 7.623876108 | 2.451798234 | 2.32E-02 | 6.18E-02 | -4.479528502 |
| Nsrpb     | 0.271874873 | 9.35665934  | 2.129231227 | 4.55E-02 | 1.04E-01 | -5.09269023  |
| Dhx9      | 0.271119004 | 9.51333576  | 4.095694799 | 5.33E-04 | 3.30E-03 | -0.838565661 |
| Smc4      | 0.270807669 | 9.806815031 | 3.210839073 | 4.26E-03 | 1.65E-02 | -2.873494217 |



|           |             |             |             |          |          |              |
|-----------|-------------|-------------|-------------|----------|----------|--------------|
| Ppil3     | 0.269885381 | 7.533747424 | 2.240244021 | 3.62E-02 | 8.75E-02 | -4.887505765 |
| Ppa1      | 0.268974172 | 7.430259083 | 2.662322929 | 1.47E-02 | 4.36E-02 | -4.053964412 |
| Parp1     | 0.268417713 | 7.974468963 | 2.39832406  | 2.60E-02 | 6.73E-02 | -4.58463097  |
| Pik3cg    | 0.267238297 | 8.49155148  | 2.246469314 | 3.58E-02 | 8.68E-02 | -4.875810047 |
| Rad21     | 0.266872309 | 10.09108726 | 3.7136359   | 1.32E-03 | 6.67E-03 | -1.729578496 |
| Tcerg1    | 0.26636513  | 8.936153765 | 3.609937294 | 1.68E-03 | 8.05E-03 | -1.968825547 |
| Ythdf1    | 0.265852388 | 8.93689419  | 3.074862351 | 5.83E-03 | 2.10E-02 | -3.17416659  |
| Ndufb8    | 0.265130565 | 10.15583138 | 2.591139485 | 1.72E-02 | 4.91E-02 | -4.199862394 |
| Park7     | 0.264429907 | 9.845097238 | 3.43951999  | 2.51E-03 | 1.08E-02 | -2.358630116 |
| Ctsc      | 0.264299379 | 8.773481176 | 2.491826986 | 2.13E-02 | 5.79E-02 | -4.400026399 |
| Timm8b    | 0.264267374 | 9.250817445 | 4.470583346 | 2.19E-04 | 1.65E-03 | 0.043633046  |
| Abce1     | 0.263785434 | 8.300199417 | 2.505086298 | 2.07E-02 | 5.65E-02 | -4.373539683 |
| Eif3l     | 0.261039202 | 9.860297056 | 3.516132054 | 2.10E-03 | 9.48E-03 | -2.183958287 |
| Coro1c    | 0.260900357 | 9.102477004 | 2.616595635 | 1.63E-02 | 4.71E-02 | -4.147912879 |
| Abcb7     | 0.260695869 | 7.258104094 | 2.268336824 | 3.42E-02 | 8.38E-02 | -4.834571772 |
| Hnnpab    | 0.25725721  | 10.99523167 | 3.946090537 | 7.60E-04 | 4.33E-03 | -1.188907934 |
| Mfsd5     | 0.257224851 | 8.610843334 | 2.716963408 | 1.30E-02 | 3.98E-02 | -3.940675061 |
| Cep128    | 0.257162307 | 8.110778769 | 2.186953395 | 4.04E-02 | 9.50E-02 | -4.986811454 |
| Tmem173   | 0.25694095  | 8.723526935 | 2.640929568 | 1.54E-02 | 4.52E-02 | -4.098017465 |
| Thyn1     | 0.256388451 | 7.329347585 | 2.384603582 | 2.68E-02 | 6.90E-02 | -4.611389569 |
| Nudc      | 0.25623189  | 8.840562761 | 2.228162382 | 3.71E-02 | 8.90E-02 | -4.910147802 |
| Hn1       | 0.255062753 | 9.344102646 | 2.608424812 | 1.66E-02 | 4.78E-02 | -4.164615194 |
| Coro1a    | 0.252210775 | 10.25338072 | 2.671446398 | 1.44E-02 | 4.31E-02 | -4.035124932 |
| Ywhae     | 0.250356088 | 11.21763741 | 4.077692693 | 5.56E-04 | 3.42E-03 | -0.880797518 |
| Rars      | 0.250332308 | 8.947238163 | 3.093796044 | 5.58E-03 | 2.03E-02 | -3.132575871 |
| Gmps      | 0.249590161 | 9.116218908 | 4.253075677 | 3.67E-04 | 2.50E-03 | -0.468706028 |
| Nol9      | 0.249557085 | 7.573180472 | 2.234782954 | 3.66E-02 | 8.81E-02 | -4.897749493 |
| Nelfa     | 0.248997923 | 8.747676154 | 3.014349802 | 6.69E-03 | 2.35E-02 | -3.306453834 |
| Cct5      | 0.248671105 | 10.7254308  | 4.020884657 | 6.36E-04 | 3.78E-03 | -1.013940233 |
| Wars      | 0.248380021 | 8.463867807 | 2.729794135 | 1.27E-02 | 3.90E-02 | -3.913914825 |
| Taf12     | 0.246426336 | 8.797012875 | 2.346542956 | 2.90E-02 | 7.37E-02 | -4.685160771 |
| Utp18     | 0.246274765 | 7.967755028 | 2.743621993 | 1.23E-02 | 3.81E-02 | -3.885009316 |
| Tfg       | 0.246103911 | 8.811251717 | 2.799818797 | 1.09E-02 | 3.44E-02 | -3.766851703 |
| Pitrm1    | 0.245565198 | 7.567220741 | 2.534461185 | 1.94E-02 | 5.38E-02 | -4.314596406 |
| Ube2d1    | 0.245526896 | 9.52977387  | 3.207260272 | 4.30E-03 | 1.66E-02 | -2.881464368 |
| Clic1     | 0.245195048 | 10.45592137 | 2.412882567 | 2.52E-02 | 6.57E-02 | -4.556143932 |
| Canx      | 0.24517686  | 10.65018817 | 3.609052772 | 1.68E-03 | 8.05E-03 | -1.970860112 |
| Eif4ebp2  | 0.244320835 | 9.611668832 | 2.86849909  | 9.30E-03 | 3.06E-02 | -3.621010679 |
| Uhrf1bp1l | 0.242074242 | 7.864060128 | 2.528168459 | 1.97E-02 | 5.43E-02 | -4.32725368  |
| Dek       | 0.241479887 | 10.45619108 | 3.328059136 | 3.25E-03 | 1.34E-02 | -2.610890598 |
| Sec31a    | 0.241358293 | 8.937880557 | 3.059450424 | 6.04E-03 | 2.15E-02 | -3.207952027 |
| Slc7a6    | 0.240327892 | 7.448704038 | 2.161198986 | 4.26E-02 | 9.90E-02 | -5.034272388 |
| Ptpn11    | 0.239602711 | 7.607147497 | 2.116284748 | 4.67E-02 | 1.05E-01 | -5.116190919 |
| Eprs      | 0.237946135 | 8.440869468 | 2.809943744 | 1.06E-02 | 3.39E-02 | -3.745449022 |
| Atf6      | 0.237491524 | 8.572314359 | 2.651304949 | 1.51E-02 | 4.44E-02 | -4.076674226 |
| Ift20     | 0.237379823 | 8.572077564 | 2.270805866 | 3.40E-02 | 8.34E-02 | -4.829900546 |
| Smarcc1   | 0.234518464 | 8.736918209 | 3.193791239 | 4.43E-03 | 1.70E-02 | -2.91143416  |
| Tma7      | 0.233897262 | 10.09237539 | 2.938869836 | 7.94E-03 | 2.69E-02 | -3.470030817 |
| Alcam     | 0.233526236 | 9.274051067 | 3.441221756 | 2.50E-03 | 1.08E-02 | -2.354760986 |
| Cd164     | 0.233197173 | 10.1362609  | 2.16319756  | 4.24E-02 | 9.86E-02 | -5.030601961 |
| BC037034  | 0.232134646 | 7.008524925 | 2.146754806 | 4.39E-02 | 1.01E-01 | -5.060735879 |
| Ddi2      | 0.231367872 | 8.796848232 | 2.164466208 | 4.23E-02 | 9.85E-02 | -5.028270956 |
| Atp2a2    | 0.231302456 | 9.080327385 | 3.013209097 | 6.71E-03 | 2.35E-02 | -3.308937971 |
| Psmc6     | 0.231036163 | 9.389233189 | 3.360083101 | 3.02E-03 | 1.27E-02 | -2.538654224 |
| Spin1     | 0.231028803 | 8.764168481 | 2.386615742 | 2.67E-02 | 6.88E-02 | -4.607470734 |
| Msmo1     | 0.230298981 | 7.744015209 | 2.459680848 | 2.28E-02 | 6.10E-02 | -4.463927779 |
| Ssr3      | 0.229237664 | 9.385962918 | 2.426560752 | 2.45E-02 | 6.41E-02 | -4.529292062 |
| Exosc3    | 0.229167693 | 9.461928811 | 2.653226398 | 1.50E-02 | 4.43E-02 | -4.072717115 |
| Sec13     | 0.227369836 | 9.409369633 | 3.407769978 | 2.70E-03 | 1.16E-02 | -2.430722574 |
| Bccip     | 0.22604136  | 8.906753681 | 2.6756239   | 1.43E-02 | 4.28E-02 | -4.02648823  |
| Kat2a     | 0.22580397  | 7.175666915 | 2.424866484 | 2.46E-02 | 6.43E-02 | -4.532622673 |
| Srsf7     | 0.22573893  | 10.59160666 | 2.296123971 | 3.23E-02 | 8.00E-02 | -4.781826449 |
| Dpy19l1   | 0.225355664 | 9.071452102 | 2.380161041 | 2.70E-02 | 6.95E-02 | -4.620035137 |
| Sp100     | 0.220785814 | 9.233526579 | 2.320802849 | 3.06E-02 | 7.71E-02 | -4.734663922 |
| Exoc6     | 0.219439084 | 8.708559095 | 2.652746741 | 1.50E-02 | 4.43E-02 | -4.073705071 |
| Trappc1   | 0.21868089  | 9.005984639 | 2.120178167 | 4.63E-02 | 1.05E-01 | -5.109133151 |
| Vamp3     | 0.217692757 | 8.919361864 | 2.448915897 | 2.34E-02 | 6.20E-02 | -4.485226203 |
| Herpud1   | 0.217138615 | 10.36268195 | 3.241928351 | 3.97E-03 | 1.56E-02 | -2.804135386 |

|               |              |             |             |          |          |              |
|---------------|--------------|-------------|-------------|----------|----------|--------------|
| Gtf3c6        | 0.21517111   | 9.184720912 | 2.865977082 | 9.36E-03 | 3.07E-02 | -3.626393083 |
| Crcp          | 0.214996209  | 8.317228019 | 2.584128252 | 1.75E-02 | 4.97E-02 | -4.214125533 |
| Ndufa12       | 0.2148107    | 10.32803259 | 2.234237712 | 3.67E-02 | 8.81E-02 | -4.898771411 |
| Rnf144b       | 0.214653689  | 8.56536867  | 2.81000273  | 1.06E-02 | 3.39E-02 | -3.745324233 |
| 5031439G07Rik | 0.21435574   | 7.97473599  | 2.305556018 | 3.16E-02 | 7.87E-02 | -4.763836304 |
| Psmc2         | 0.213985064  | 9.26655604  | 2.198849148 | 3.94E-02 | 9.36E-02 | -4.964771633 |
| Pet100        | 0.212475464  | 8.335572868 | 2.151556786 | 4.34E-02 | 1.00E-01 | -5.051950491 |
| Necap2        | 0.212032308  | 9.496200585 | 2.199518666 | 3.94E-02 | 9.35E-02 | -4.963528987 |
| Ssr2          | 0.211058132  | 9.606735776 | 3.183827209 | 4.54E-03 | 1.73E-02 | -2.933577958 |
| Psmb7         | 0.211040685  | 10.36739486 | 2.123743772 | 4.60E-02 | 1.05E-01 | -5.102662344 |
| Esyt1         | 0.210677989  | 8.290483069 | 2.407923569 | 2.55E-02 | 6.63E-02 | -4.565858159 |
| Magt1         | 0.210220167  | 9.137929854 | 2.745291741 | 1.22E-02 | 3.80E-02 | -3.881514336 |
| Psmb4         | 0.209580757  | 10.6951349  | 3.308552769 | 3.40E-03 | 1.39E-02 | -2.654790901 |
| Vmp1          | 0.208789574  | 7.727168419 | 2.316895703 | 3.09E-02 | 7.74E-02 | -4.742150343 |
| Rsu1          | 0.208159895  | 10.5514756  | 2.441220756 | 2.38E-02 | 6.26E-02 | -4.500419713 |
| Ncl           | 0.207784338  | 10.46013762 | 3.036439016 | 6.36E-03 | 2.25E-02 | -3.258279008 |
| Ipo7          | 0.205498899  | 8.769932159 | 2.429695936 | 2.43E-02 | 6.38E-02 | -4.523125492 |
| Elf5a         | 0.203904757  | 6.773670585 | 2.10867574  | 4.74E-02 | 1.07E-01 | -5.129960061 |
| Ptbp1         | 0.202373998  | 10.03914115 | 2.318015588 | 3.08E-02 | 7.73E-02 | -4.740005302 |
| Al662270      | 0.202049672  | 9.907195292 | 2.134951503 | 4.49E-02 | 1.03E-01 | -5.082277567 |
| Sdcbp         | 0.20176103   | 9.312618541 | 2.871994539 | 9.23E-03 | 3.04E-02 | -3.613547451 |
| Trp53         | 0.201364167  | 9.398256355 | 2.462085752 | 2.27E-02 | 6.07E-02 | -4.459162739 |
| Hint1         | 0.20046875   | 10.34433811 | 2.141464007 | 4.43E-02 | 1.02E-01 | -5.070401197 |
| Psmc14        | 0.198541382  | 9.610959104 | 2.924512328 | 8.20E-03 | 2.77E-02 | -3.50095745  |
| Mapk3         | 0.19530461   | 9.212088447 | 2.736365796 | 1.25E-02 | 3.85E-02 | -3.900185986 |
| Rnf130        | 0.194762816  | 9.432565763 | 2.275137789 | 3.37E-02 | 8.30E-02 | -4.821697566 |
| Cct8          | 0.194583389  | 9.589623708 | 2.644910395 | 1.53E-02 | 4.48E-02 | -4.089833337 |
| Aatf          | 0.193961076  | 8.245625066 | 2.370055094 | 2.76E-02 | 7.07E-02 | -4.639668116 |
| Nup153        | 0.193187133  | 9.173346848 | 2.863629616 | 9.41E-03 | 3.08E-02 | -3.631401169 |
| Strap         | 0.191830713  | 8.470731268 | 2.130575736 | 4.53E-02 | 1.04E-01 | -5.09024441  |
| Psma2         | 0.191149577  | 9.536831707 | 2.106654631 | 4.76E-02 | 1.07E-01 | -5.133612069 |
| Hnrnpd        | 0.190921933  | 10.52192222 | 2.56574271  | 1.82E-02 | 5.11E-02 | -4.251434233 |
| Snx2          | 0.189315461  | 9.013788488 | 2.244207503 | 3.59E-02 | 8.71E-02 | -4.880061677 |
| Psmc1         | 0.188813899  | 9.012356677 | 3.084437865 | 5.70E-03 | 2.06E-02 | -3.153144145 |
| Actb          | 0.188295725  | 13.26639215 | 2.091219331 | 4.91E-02 | 1.10E-01 | -5.161428055 |
| P4hb          | 0.186207094  | 9.255836332 | 2.154971668 | 4.31E-02 | 1.00E-01 | -5.045695309 |
| Mdh1          | 0.185323758  | 9.74781267  | 2.25453953  | 3.52E-02 | 8.56E-02 | -4.860619023 |
| Nup210        | 0.184907242  | 9.562463156 | 3.065215743 | 5.96E-03 | 2.13E-02 | -3.195320852 |
| Atp5k         | 0.184515472  | 11.68008413 | 2.382619624 | 2.69E-02 | 6.92E-02 | -4.615251648 |
| Dad1          | 0.184048261  | 9.404591649 | 2.124340166 | 4.59E-02 | 1.05E-01 | -5.101579339 |
| Sgk3          | 0.183485158  | 8.801436768 | 2.196370389 | 3.96E-02 | 9.39E-02 | -4.969370251 |
| Slk           | 0.182108159  | 8.967968012 | 3.267153194 | 3.74E-03 | 1.49E-02 | -2.74770298  |
| Efr3a         | 0.18080687   | 8.622091223 | 2.675734004 | 1.43E-02 | 4.28E-02 | -4.026260508 |
| Emc3          | 0.17985032   | 8.90399068  | 2.639411308 | 1.55E-02 | 4.52E-02 | -4.101137241 |
| Crip1         | 0.176624508  | 12.09455551 | 2.264100794 | 3.45E-02 | 8.43E-02 | -4.84257891  |
| Srp72         | 0.17300497   | 9.516169769 | 2.316793932 | 3.09E-02 | 7.74E-02 | -4.742345246 |
| Bag1          | 0.172064008  | 10.25254322 | 2.616050044 | 1.63E-02 | 4.71E-02 | -4.149028958 |
| Ptbp3         | 0.170012602  | 10.38102999 | 3.336428554 | 3.19E-03 | 1.32E-02 | -2.59203124  |
| Pgls          | 0.169633373  | 9.883998196 | 2.093072935 | 4.89E-02 | 1.10E-01 | -5.15809466  |
| Mtpn          | 0.166923188  | 10.54419486 | 2.59127525  | 1.72E-02 | 4.91E-02 | -4.19958601  |
| Mdh2          | 0.16551996   | 10.42819064 | 2.441944332 | 2.37E-02 | 6.25E-02 | -4.498992179 |
| Atp5a1        | 0.165176808  | 10.95232479 | 2.716511282 | 1.31E-02 | 3.98E-02 | -3.941616956 |
| Phka2         | 0.16110006   | 8.569577961 | 2.224112274 | 3.74E-02 | 8.96E-02 | -4.917721361 |
| Fubp1         | 0.159031828  | 9.131630988 | 2.369805678 | 2.76E-02 | 7.07E-02 | -4.640152059 |
| Fam49b        | 0.157343567  | 9.838358785 | 2.232395325 | 3.68E-02 | 8.84E-02 | -4.902223373 |
| Atp5g3        | 0.156955098  | 10.21215774 | 2.147143796 | 4.38E-02 | 1.01E-01 | -5.060024672 |
| Gltp          | 0.156348375  | 10.48633967 | 2.153831382 | 4.32E-02 | 1.00E-01 | -5.047784714 |
| S100a6        | 0.15229055   | 11.84529172 | 2.396093998 | 2.61E-02 | 6.75E-02 | -4.588986063 |
| Akr1a1        | 0.151487943  | 11.07702221 | 2.5561746   | 1.85E-02 | 5.19E-02 | -4.270796203 |
| Stk17b        | 0.151348874  | 10.30237153 | 2.312249012 | 3.12E-02 | 7.80E-02 | -4.751044192 |
| Clint1        | 0.15082664   | 10.23952167 | 2.565914956 | 1.82E-02 | 5.11E-02 | -4.251085335 |
| Elf4g1        | 0.147900938  | 9.280453241 | 2.1394601   | 4.45E-02 | 1.02E-01 | -5.074058018 |
| Psma7         | 0.14609856   | 11.25333926 | 2.384178632 | 2.68E-02 | 6.90E-02 | -4.612216952 |
| Stt3a         | 0.144018125  | 9.738726591 | 2.198147546 | 3.95E-02 | 9.37E-02 | -4.966073578 |
| Etf1          | 0.136778326  | 9.315167535 | 2.17651619  | 4.13E-02 | 9.67E-02 | -5.006087738 |
| Dnajc3        | 0.132697878  | 10.05251622 | 2.294361386 | 3.24E-02 | 8.02E-02 | -4.785183479 |
| Atp5b         | 0.129232975  | 10.94094313 | 2.097063151 | 4.85E-02 | 1.09E-01 | -5.150912442 |
| Sf3b1         | -0.115407075 | 11.08099994 | -2.21461151 | 3.82E-02 | 9.11E-02 | -4.935454381 |

|               |              |             |              |          |          |              |
|---------------|--------------|-------------|--------------|----------|----------|--------------|
| Supt20        | -0.129608564 | 9.797387864 | -2.422537473 | 2.47E-02 | 6.45E-02 | -4.537198967 |
| Dync1h1       | -0.134589052 | 9.555243113 | -2.238897284 | 3.63E-02 | 8.76E-02 | -4.890033348 |
| Nckap1l       | -0.142247357 | 10.57264742 | -2.471460408 | 2.23E-02 | 5.99E-02 | -4.440563853 |
| Samhd1        | -0.142699805 | 11.46015402 | -2.261836957 | 3.46E-02 | 8.46E-02 | -4.846854443 |
| Rab21         | -0.1443026   | 10.29103406 | -2.149958514 | 4.36E-02 | 1.01E-01 | -5.054875962 |
| Cat           | -0.14664251  | 10.46107331 | -2.187732932 | 4.04E-02 | 9.50E-02 | -4.98536944  |
| Ctss          | -0.146645417 | 11.37669948 | -2.850627973 | 9.68E-03 | 3.14E-02 | -3.659107048 |
| Npc2          | -0.148787522 | 11.23210372 | -2.29845401  | 3.21E-02 | 7.97E-02 | -4.777386308 |
| Eif3g         | -0.149781013 | 10.57812097 | -2.141582734 | 4.43E-02 | 1.02E-01 | -5.07018447  |
| Mapre2        | -0.152853036 | 8.412625988 | -2.152144588 | 4.34E-02 | 1.00E-01 | -5.050874234 |
| Map4k4        | -0.157655687 | 8.980275759 | -2.267389153 | 3.42E-02 | 8.39E-02 | -4.836363882 |
| Fam129a       | -0.158206552 | 9.094217316 | -2.345080665 | 2.91E-02 | 7.38E-02 | -4.687981495 |
| Nup98         | -0.158300611 | 9.509503916 | -2.450943607 | 2.33E-02 | 6.18E-02 | -4.48121828  |
| Nfatc1        | -0.161404097 | 8.262931748 | -2.119252771 | 4.64E-02 | 1.05E-01 | -5.110811408 |
| Camta2        | -0.163790955 | 8.880773249 | -2.448768183 | 2.34E-02 | 6.20E-02 | -4.4855181   |
| Ptpcr         | -0.163926082 | 11.0398556  | -2.152674559 | 4.33E-02 | 1.00E-01 | -5.049903709 |
| Pcmt1         | -0.164375717 | 8.975362427 | -2.178393972 | 4.11E-02 | 9.64E-02 | -5.002623937 |
| Mef2a         | -0.165647627 | 9.717840895 | -2.500787177 | 2.09E-02 | 5.69E-02 | -4.382135771 |
| Itpril2       | -0.16784432  | 9.173486037 | -2.345601676 | 2.91E-02 | 7.38E-02 | -4.686976593 |
| H2-D1         | -0.168166547 | 12.72114069 | -2.166128176 | 4.22E-02 | 9.83E-02 | -5.02521597  |
| Sri           | -0.169017042 | 10.83247243 | -2.60750575  | 1.66E-02 | 4.78E-02 | -4.166492253 |
| Itch          | -0.169267107 | 9.243875922 | -2.167116897 | 4.21E-02 | 9.82E-02 | -5.023397831 |
| Usp3          | -0.169688065 | 8.932321997 | -2.495265046 | 2.12E-02 | 5.75E-02 | -4.393165744 |
| Mtf1          | -0.170341611 | 8.110609612 | -2.40382498  | 2.57E-02 | 6.66E-02 | -4.573878497 |
| St3gal1       | -0.170582184 | 9.559838168 | -2.771457551 | 1.16E-02 | 3.61E-02 | -3.826618965 |
| Smarca2       | -0.170784007 | 8.972771849 | -2.483511381 | 2.17E-02 | 5.87E-02 | -4.416599282 |
| Il10rb        | -0.170859667 | 8.656377767 | -2.097489445 | 4.85E-02 | 1.09E-01 | -5.150144608 |
| Inpp5d        | -0.173442687 | 9.803473566 | -2.191216547 | 4.01E-02 | 9.45E-02 | -4.978921431 |
| Esy12         | -0.176126439 | 9.266199166 | -2.090964491 | 4.91E-02 | 1.10E-01 | -5.161886191 |
| Zfr           | -0.177902769 | 9.659222493 | -2.23643954  | 3.65E-02 | 8.79E-02 | -4.894643716 |
| Rab43         | -0.18063821  | 9.169934332 | -2.881208034 | 9.04E-03 | 3.01E-02 | -3.593857015 |
| Ifi30         | -0.181383073 | 11.59780226 | -2.949076163 | 7.76E-03 | 2.65E-02 | -3.448008647 |
| Bcl6          | -0.18168915  | 10.3768874  | -2.581609164 | 1.76E-02 | 4.99E-02 | -4.219245394 |
| Mttr4         | -0.182141281 | 9.287022832 | -2.904178573 | 8.59E-03 | 2.88E-02 | -3.54465066  |
| Apobec3       | -0.182398972 | 10.4048234  | -2.892063014 | 8.82E-03 | 2.94E-02 | -3.570624406 |
| Ifngr1        | -0.18295225  | 9.772967925 | -2.488684623 | 2.15E-02 | 5.82E-02 | -4.406292569 |
| Vti1b         | -0.18302858  | 9.753453867 | -2.241574028 | 3.61E-02 | 8.74E-02 | -4.885008676 |
| Skap2         | -0.183570193 | 9.940936205 | -3.012812016 | 6.71E-03 | 2.35E-02 | -3.309802617 |
| Aftph         | -0.183990575 | 9.902087221 | -2.255526603 | 3.51E-02 | 8.55E-02 | -4.858758748 |
| Sema4a        | -0.184321938 | 9.022452447 | -2.235895314 | 3.65E-02 | 8.80E-02 | -4.895664188 |
| Otd5          | -0.185869819 | 8.958872794 | -2.61915438  | 1.62E-02 | 4.69E-02 | -4.142677088 |
| Myo1g         | -0.186155188 | 10.208374   | -2.191821809 | 4.00E-02 | 9.44E-02 | -4.977800471 |
| Mir3064       | -0.186895442 | 12.24381025 | -2.728369937 | 1.27E-02 | 3.91E-02 | -3.91688809  |
| Arhgap30      | -0.187917435 | 10.07460151 | -3.020350618 | 6.60E-03 | 2.33E-02 | -3.293379804 |
| Kdm6a         | -0.188841323 | 9.730908967 | -2.532174987 | 1.95E-02 | 5.40E-02 | -4.319196797 |
| Dapp1         | -0.188993015 | 9.459491782 | -2.986647278 | 7.12E-03 | 2.46E-02 | -3.366679178 |
| Pias1         | -0.189083743 | 9.815255319 | -2.605407503 | 1.67E-02 | 4.79E-02 | -4.170776391 |
| Man2a1        | -0.189824818 | 8.488955669 | -2.301551013 | 3.19E-02 | 7.93E-02 | -4.771480526 |
| Spop          | -0.1903746   | 10.86286836 | -2.75650747  | 1.19E-02 | 3.72E-02 | -3.858013128 |
| Eya3          | -0.192199665 | 9.194532742 | -2.608299523 | 1.66E-02 | 4.78E-02 | -4.164871099 |
| Lyst          | -0.192498209 | 9.716795656 | -2.128447927 | 4.55E-02 | 1.04E-01 | -5.094114692 |
| Kdm7a         | -0.19327116  | 9.319035151 | -3.245074721 | 3.94E-03 | 1.55E-02 | -2.797103981 |
| Heca          | -0.194507943 | 8.539183651 | -2.277180644 | 3.36E-02 | 8.27E-02 | -4.817825957 |
| Kif2a         | -0.194968014 | 9.878273478 | -2.605210595 | 1.67E-02 | 4.79E-02 | -4.171178344 |
| Flt3          | -0.195801805 | 10.87706901 | -2.630720979 | 1.58E-02 | 4.60E-02 | -4.118977435 |
| Polr2g        | -0.195883567 | 10.38476024 | -2.157584505 | 4.29E-02 | 9.96E-02 | -5.040905045 |
| Itgb1         | -0.196329578 | 10.05490668 | -2.580447058 | 1.76E-02 | 4.99E-02 | -4.221606432 |
| Wnk1          | -0.196477629 | 10.63201125 | -2.390417063 | 2.65E-02 | 6.83E-02 | -4.600062283 |
| Adrbk2        | -0.196930427 | 9.214031684 | -2.668719163 | 1.45E-02 | 4.33E-02 | -4.040759793 |
| 2700060E02Rik | -0.198464515 | 10.32676512 | -2.28842576  | 3.28E-02 | 8.10E-02 | -4.796477295 |
| App           | -0.198853301 | 9.084715326 | -2.793090033 | 1.10E-02 | 3.47E-02 | -3.781056305 |
| Sh3glb1       | -0.199076276 | 10.1358786  | -2.954235304 | 7.67E-03 | 2.63E-02 | -3.436865079 |
| Jarid2        | -0.199434057 | 8.235004869 | -2.403490385 | 2.57E-02 | 6.66E-02 | -4.574532915 |
| P2rx4         | -0.200763178 | 8.693934776 | -2.18323213  | 4.07E-02 | 9.56E-02 | -4.993690775 |
| Ypel5         | -0.201255602 | 8.941647997 | -2.365036322 | 2.79E-02 | 7.12E-02 | -4.649400494 |
| Tbc1d1        | -0.201430413 | 8.531929633 | -2.568106586 | 1.81E-02 | 5.09E-02 | -4.246644986 |
| Myo9a         | -0.202335515 | 8.440630997 | -2.188641434 | 4.03E-02 | 9.49E-02 | -4.983688459 |
| Kansl3        | -0.204014266 | 8.04951119  | -2.942187937 | 7.88E-03 | 2.68E-02 | -3.462874744 |

|               |              |             |              |          |          |              |
|---------------|--------------|-------------|--------------|----------|----------|--------------|
| Dip2b         | -0.204635878 | 8.799551663 | -2.423691067 | 2.47E-02 | 6.44E-02 | -4.534932563 |
| Itga4         | -0.204796542 | 10.21937184 | -2.736891458 | 1.25E-02 | 3.85E-02 | -3.899087166 |
| Foxn2         | -0.205270146 | 9.011833285 | -2.906309328 | 8.55E-03 | 2.87E-02 | -3.540078002 |
| Uvrag         | -0.205396195 | 10.56590961 | -2.502646754 | 2.08E-02 | 5.68E-02 | -4.378418511 |
| Trpv2         | -0.205738925 | 8.86267612  | -2.961406237 | 7.54E-03 | 2.59E-02 | -3.421363148 |
| Trappc11      | -0.205988653 | 8.115889079 | -2.404515708 | 2.57E-02 | 6.66E-02 | -4.57252738  |
| Mgea5         | -0.206695605 | 9.508741585 | -2.568653122 | 1.81E-02 | 5.09E-02 | -4.245537375 |
| Lrrc8c        | -0.208600289 | 9.874346184 | -2.146271554 | 4.39E-02 | 1.01E-01 | -5.06161932  |
| Marcks        | -0.208709837 | 8.350355368 | -2.566934414 | 1.81E-02 | 5.10E-02 | -4.249020105 |
| Vgll4         | -0.210522902 | 8.185339691 | -2.163580787 | 4.24E-02 | 9.86E-02 | -5.029897914 |
| Irf5          | -0.211985164 | 9.022943291 | -2.480943097 | 2.18E-02 | 5.89E-02 | -4.42171183  |
| Arid1b        | -0.212703049 | 9.019683648 | -2.682327807 | 1.41E-02 | 4.23E-02 | -4.012614796 |
| Gpbp1         | -0.21367662  | 9.698651061 | -2.924733257 | 8.20E-03 | 2.77E-02 | -3.500482029 |
| Themis2       | -0.214677743 | 9.674419917 | -2.231104168 | 3.69E-02 | 8.86E-02 | -4.904641499 |
| Stat6         | -0.215463899 | 8.903458899 | -2.606199571 | 1.66E-02 | 4.79E-02 | -4.169159374 |
| Man2b1        | -0.216921763 | 10.38462222 | -3.234200864 | 4.04E-03 | 1.58E-02 | -2.821395248 |
| Arf4          | -0.218897945 | 9.83413132  | -3.387520816 | 2.83E-03 | 1.20E-02 | -2.476605364 |
| Dhx57         | -0.219688552 | 8.625237736 | -2.19958219  | 3.94E-02 | 9.35E-02 | -4.963411071 |
| Usp47         | -0.221041668 | 9.226235512 | -3.545295156 | 1.96E-03 | 9.04E-03 | -2.117217499 |
| Traf6         | -0.221701647 | 8.470601645 | -3.00024567  | 6.91E-03 | 2.41E-02 | -3.337143202 |
| Rtn1          | -0.221749292 | 7.328068351 | -2.41783586  | 2.50E-02 | 6.51E-02 | -4.546429773 |
| Atmin         | -0.221895348 | 8.517875431 | -2.475795271 | 2.21E-02 | 5.94E-02 | -4.431950771 |
| 2810474O19Rik | -0.222559783 | 9.376350358 | -2.982627391 | 7.19E-03 | 2.48E-02 | -3.3754004   |
| Evl           | -0.223280281 | 8.696234512 | -2.369079678 | 2.77E-02 | 7.08E-02 | -4.641560557 |
| Wrm           | -0.223361107 | 8.562542319 | -2.710969174 | 1.32E-02 | 4.02E-02 | -3.953156591 |
| Usp6nl        | -0.223386126 | 8.452063577 | -2.263088713 | 3.46E-02 | 8.44E-02 | -4.844490665 |
| Os9           | -0.22519235  | 9.088481992 | -2.63433632  | 1.56E-02 | 4.57E-02 | -4.111559101 |
| Kmt2a         | -0.225358075 | 9.195752649 | -2.816594893 | 1.05E-02 | 3.36E-02 | -3.731370844 |
| Fyn           | -0.228730408 | 8.513394063 | -2.268394833 | 3.42E-02 | 8.38E-02 | -4.834462059 |
| Rspry1        | -0.229204036 | 7.898636647 | -2.375049525 | 2.73E-02 | 7.01E-02 | -4.629971285 |
| Kdm1b         | -0.22977495  | 7.899149508 | -2.77280179  | 1.15E-02 | 3.60E-02 | -3.823792372 |
| Pik3cb        | -0.230064573 | 9.726493434 | -3.292927306 | 3.53E-03 | 1.42E-02 | -2.689900874 |
| H2-Eb1        | -0.230949597 | 11.71711714 | -3.28803702  | 3.57E-03 | 1.44E-02 | -2.700878796 |
| Jak2          | -0.231132398 | 10.864644   | -3.461249716 | 2.38E-03 | 1.05E-02 | -2.309187704 |
| Lamp1         | -0.231367369 | 10.05206597 | -2.525686765 | 1.98E-02 | 5.46E-02 | -4.332240861 |
| 1700021K19Rik | -0.231448197 | 7.968984152 | -2.464876967 | 2.26E-02 | 6.05E-02 | -4.453629101 |
| Aim2          | -0.232415364 | 8.790212108 | -2.144516012 | 4.41E-02 | 1.01E-01 | -5.064827588 |
| Hbp1          | -0.233624249 | 8.964966265 | -2.717179604 | 1.30E-02 | 3.98E-02 | -3.940224645 |
| Gdi1          | -0.233766312 | 9.975047132 | -2.509865503 | 2.05E-02 | 5.62E-02 | -4.363974478 |
| Rabgap1       | -0.234369817 | 8.381419137 | -2.799688573 | 1.09E-02 | 3.44E-02 | -3.767126754 |
| Fbxw11        | -0.235810369 | 8.57744409  | -2.863640151 | 9.41E-03 | 3.08E-02 | -3.631378697 |
| Aebp2         | -0.235950927 | 9.918539978 | -2.265711037 | 3.44E-02 | 8.40E-02 | -4.839536213 |
| Ccni          | -0.237974117 | 9.916304015 | -2.192500319 | 4.00E-02 | 9.44E-02 | -4.976543625 |
| Zbtb20        | -0.23819622  | 7.557193019 | -2.572671538 | 1.79E-02 | 5.05E-02 | -4.237389939 |
| Arl4c         | -0.238408046 | 8.834541836 | -2.809067848 | 1.06E-02 | 3.39E-02 | -3.747301893 |
| Glce          | -0.240540041 | 8.171378452 | -2.234570783 | 3.66E-02 | 8.81E-02 | -4.898147171 |
| Atp6v1d       | -0.240877951 | 9.889857474 | -3.920037377 | 8.08E-04 | 4.55E-03 | -1.249755548 |
| Sidt2         | -0.24090244  | 8.444553943 | -2.321769514 | 3.06E-02 | 7.70E-02 | -4.732810575 |
| Nub1          | -0.241027393 | 8.86451565  | -3.295722691 | 3.50E-03 | 1.42E-02 | -2.683623433 |
| Plekha2       | -0.241124167 | 7.419033372 | -2.138493521 | 4.46E-02 | 1.02E-01 | -5.075821101 |
| Plekha5       | -0.241865007 | 7.540841404 | -2.340273228 | 2.94E-02 | 7.42E-02 | -4.697247771 |
| Sdf2          | -0.242738414 | 8.922772906 | -3.035481259 | 6.38E-03 | 2.25E-02 | -3.260370569 |
| Tspan33       | -0.242803674 | 8.268463452 | -2.403634504 | 2.57E-02 | 6.66E-02 | -4.574251046 |
| Snappc3       | -0.243464914 | 8.713171147 | -4.005845507 | 6.59E-04 | 3.89E-03 | -1.049153496 |
| N4bp1         | -0.244093927 | 8.261647606 | -2.79534474  | 1.10E-02 | 3.46E-02 | -3.776298258 |
| Cep63         | -0.244296427 | 8.581992374 | -3.8758406   | 8.97E-04 | 4.96E-03 | -1.352848158 |
| Lrch1         | -0.245703024 | 9.643352394 | -2.798988519 | 1.09E-02 | 3.44E-02 | -3.768605266 |
| Hps5          | -0.245962352 | 8.54779371  | -2.581600531 | 1.76E-02 | 4.99E-02 | -4.219262935 |
| Pgap2         | -0.246639166 | 8.369613482 | -2.327509202 | 3.02E-02 | 7.61E-02 | -4.72179685  |
| Mta3          | -0.247591396 | 7.926485239 | -3.985985745 | 6.91E-04 | 4.03E-03 | -1.095630143 |
| Cstb          | -0.249573647 | 9.342205419 | -2.547978622 | 1.89E-02 | 5.26E-02 | -4.287351854 |
| Ankib1        | -0.250096829 | 8.592629792 | -3.059249643 | 6.04E-03 | 2.15E-02 | -3.208391758 |
| Adam17        | -0.251477097 | 8.865466685 | -3.23313529  | 4.05E-03 | 1.58E-02 | -2.823774241 |
| Taf9b         | -0.251804628 | 7.502412357 | -2.301033806 | 3.19E-02 | 7.93E-02 | -4.772467132 |
| Stat3         | -0.252118816 | 10.09440044 | -3.661427563 | 1.49E-03 | 7.35E-03 | -1.850204469 |
| Fbxl5         | -0.252145113 | 8.614672768 | -2.864494159 | 9.39E-03 | 3.08E-02 | -3.629556956 |
| Myo9b         | -0.252390381 | 9.25732393  | -2.6290246   | 1.58E-02 | 4.61E-02 | -4.122456508 |
| Elf2ak4       | -0.252912261 | 7.262947738 | -2.240771218 | 3.62E-02 | 8.75E-02 | -4.886516059 |

|               |              |             |              |          |          |              |
|---------------|--------------|-------------|--------------|----------|----------|--------------|
| Pold4         | -0.253005423 | 9.388089589 | -2.486596543 | 2.16E-02 | 5.84E-02 | -4.410454059 |
| Taz           | -0.253136973 | 8.720949005 | -2.791813711 | 1.10E-02 | 3.48E-02 | -3.783748932 |
| Tsc22d1       | -0.253235739 | 7.729004776 | -2.66271563  | 1.47E-02 | 4.36E-02 | -4.053154148 |
| Pus10         | -0.25388693  | 8.177980789 | -2.510404557 | 2.05E-02 | 5.61E-02 | -4.362894997 |
| Akap13        | -0.254806488 | 9.638277845 | -3.379012064 | 2.89E-03 | 1.22E-02 | -2.495862688 |
| Pdlim2        | -0.255024578 | 7.51362227  | -2.442387322 | 2.37E-02 | 6.25E-02 | -4.498118097 |
| Rala          | -0.255599842 | 9.548555386 | -3.268106196 | 3.74E-03 | 1.49E-02 | -2.745568251 |
| Vps39         | -0.256565168 | 8.885415411 | -2.573801112 | 1.79E-02 | 5.05E-02 | -4.23509853  |
| Sipa1l1       | -0.256714916 | 7.79716476  | -2.871448748 | 9.24E-03 | 3.04E-02 | -3.614713038 |
| Zbtb38        | -0.257722854 | 6.478478237 | -2.434288267 | 2.41E-02 | 6.33E-02 | -4.514084939 |
| Agap1         | -0.258080303 | 7.730620302 | -2.280149496 | 3.33E-02 | 8.23E-02 | -4.812195715 |
| 4930523C07Rik | -0.258425025 | 9.101364274 | -2.849914749 | 9.70E-03 | 3.14E-02 | -3.660625327 |
| Atp7a         | -0.258763502 | 8.017220413 | -2.199890188 | 3.94E-02 | 9.35E-02 | -4.962839329 |
| Trim5         | -0.258934104 | 8.616767148 | -2.111834373 | 4.71E-02 | 1.06E-01 | -5.124248114 |
| Pik3r1        | -0.259770412 | 9.733766561 | -3.759645617 | 1.18E-03 | 6.16E-03 | -1.62300327  |
| Btg2          | -0.260276713 | 10.48640989 | -4.299089492 | 3.29E-04 | 2.30E-03 | -0.360397793 |
| Sepsecs       | -0.261265743 | 8.368442376 | -2.442086586 | 2.37E-02 | 6.25E-02 | -4.498711502 |
| Gmpr2         | -0.26148856  | 8.833886938 | -2.872216753 | 9.23E-03 | 3.04E-02 | -3.613072867 |
| Mvp           | -0.261918188 | 9.193361843 | -3.115708354 | 5.31E-03 | 1.96E-02 | -3.084327316 |
| Fbrs          | -0.26204293  | 9.848601574 | -2.646610017 | 1.52E-02 | 4.47E-02 | -4.086337266 |
| Peak1         | -0.26244262  | 9.454094552 | -2.876980926 | 9.13E-03 | 3.02E-02 | -3.602894208 |
| Gns           | -0.262549552 | 9.523041536 | -3.673356862 | 1.45E-03 | 7.16E-03 | -1.822672274 |
| 3110043O21Rik | -0.262604704 | 8.813981224 | -2.874032251 | 9.19E-03 | 3.03E-02 | -3.609194897 |
| Gramd1b       | -0.262784884 | 8.16803985  | -2.896880247 | 8.73E-03 | 2.91E-02 | -3.560302486 |
| Sirt2         | -0.265132667 | 8.828188085 | -3.243848237 | 3.95E-03 | 1.55E-02 | -2.799845146 |
| Ptpn22        | -0.265276126 | 8.721069116 | -2.13105181  | 4.53E-02 | 1.04E-01 | -5.08937814  |
| Foxj2         | -0.265448789 | 9.117275917 | -2.498472022 | 2.10E-02 | 5.71E-02 | -4.386761671 |
| Gm10865       | -0.265475592 | 6.550821236 | -3.47332851  | 2.32E-03 | 1.03E-02 | -2.281669422 |
| Rcsd1         | -0.26609048  | 8.986713566 | -3.254091623 | 3.86E-03 | 1.53E-02 | -2.776941281 |
| Nedd4         | -0.266251952 | 9.783911036 | -2.889916322 | 8.87E-03 | 2.95E-02 | -3.575221822 |
| Sat1          | -0.266954462 | 11.63745037 | -3.295387694 | 3.51E-03 | 1.42E-02 | -2.684375803 |
| Cdk12         | -0.268565044 | 9.35971897  | -2.607696584 | 1.66E-02 | 4.78E-02 | -4.166102528 |
| Baz2b         | -0.268612618 | 9.542936428 | -2.987334164 | 7.11E-03 | 2.46E-02 | -3.365188504 |
| Nedd4l        | -0.269322479 | 7.9162906   | -3.54227929  | 1.97E-03 | 9.08E-03 | -2.124125529 |
| Malt1         | -0.269420735 | 9.825356768 | -3.181616568 | 4.56E-03 | 1.73E-02 | -2.938487681 |
| Snx11         | -0.27020912  | 7.075745421 | -2.520563844 | 2.00E-02 | 5.50E-02 | -4.342527691 |
| Smim24        | -0.270974754 | 7.752642103 | -2.850903829 | 9.68E-03 | 3.14E-02 | -3.658519776 |
| Mbp           | -0.272811105 | 7.195870688 | -3.324026089 | 3.28E-03 | 1.35E-02 | -2.619973528 |
| Evi2a         | -0.273714168 | 9.687468554 | -2.697609765 | 1.36E-02 | 4.12E-02 | -3.98092746  |
| Cmc1          | -0.273882935 | 8.080299865 | -2.826713785 | 1.02E-02 | 3.29E-02 | -3.709924577 |
| 1500012F01Rik | -0.273924784 | 9.987463355 | -3.657190599 | 1.50E-03 | 7.40E-03 | -1.859978739 |
| Bsdcl         | -0.274877798 | 8.808291864 | -3.148120444 | 4.93E-03 | 1.85E-02 | -3.012738855 |
| Btg1          | -0.275657914 | 10.30754286 | -2.308918319 | 3.14E-02 | 7.83E-02 | -4.757412761 |
| Tmem168       | -0.275817937 | 8.538883319 | -4.284403998 | 3.41E-04 | 2.36E-03 | -0.394971198 |
| Dnase1l1      | -0.276378252 | 8.219977996 | -2.667223369 | 1.46E-02 | 4.34E-02 | -4.043849139 |
| Cd86          | -0.276587473 | 10.07374991 | -3.086408691 | 5.68E-03 | 2.06E-02 | -3.148814362 |
| Il18bp        | -0.276720347 | 7.578878356 | -3.591274738 | 1.76E-03 | 8.27E-03 | -2.011729506 |
| Tapbpl        | -0.278678942 | 9.474355929 | -3.359487345 | 3.02E-03 | 1.27E-02 | -2.539999898 |
| Hivep1        | -0.279436208 | 9.831987263 | -2.311852798 | 3.12E-02 | 7.80E-02 | -4.751802069 |
| H2-T22        | -0.280067791 | 9.143150084 | -2.186865088 | 4.04E-02 | 9.50E-02 | -4.986974788 |
| Tiparp        | -0.280333497 | 8.440486327 | -2.40859443  | 2.55E-02 | 6.62E-02 | -4.564544655 |
| Bcor          | -0.280670091 | 8.238829559 | -2.812311906 | 1.06E-02 | 3.38E-02 | -3.740438128 |
| Cd44          | -0.280747441 | 8.384105976 | -2.557071184 | 1.85E-02 | 5.19E-02 | -4.268983462 |
| Asl           | -0.280970038 | 8.374243822 | -2.31127296  | 3.13E-02 | 7.80E-02 | -4.752911043 |
| Zmym5         | -0.281541645 | 8.621768466 | -3.790593948 | 1.10E-03 | 5.82E-03 | -1.551182478 |
| Idnk          | -0.282296952 | 9.334638783 | -3.098304227 | 5.52E-03 | 2.02E-02 | -3.122659327 |
| Ctsz          | -0.283027501 | 10.31717075 | -3.5346916   | 2.01E-03 | 9.16E-03 | -2.141499422 |
| Ncoa2         | -0.283260366 | 9.6950241   | -2.857873264 | 9.53E-03 | 3.11E-02 | -3.643674349 |
| Dnajc1        | -0.28346812  | 8.245227644 | -3.181531298 | 4.56E-03 | 1.73E-02 | -2.938677038 |
| Jak1          | -0.284257835 | 10.09292527 | -3.846541536 | 9.62E-04 | 5.25E-03 | -1.421094526 |
| 2410006H16Rik | -0.284544242 | 11.29789839 | -4.214452835 | 4.02E-04 | 2.67E-03 | -0.55956653  |
| Abhd16a       | -0.284629792 | 7.781922627 | -2.278321067 | 3.35E-02 | 8.25E-02 | -4.815663733 |
| Kdm2b         | -0.285009458 | 7.73830249  | -3.122397803 | 5.23E-03 | 1.94E-02 | -3.069573699 |
| Atp6ap2       | -0.285957588 | 8.144918206 | -3.245078354 | 3.94E-03 | 1.55E-02 | -2.797095862 |
| Card11        | -0.286073036 | 7.6039283   | -2.123302112 | 4.60E-02 | 1.05E-01 | -5.10346424  |
| Aff1          | -0.28619047  | 8.930080265 | -3.601855377 | 1.71E-03 | 8.14E-03 | -1.987411381 |
| Gusb          | -0.2876856   | 9.733924042 | -3.991359618 | 6.82E-04 | 3.99E-03 | -1.083056713 |
| Mtmr1         | -0.28827589  | 8.654608545 | -4.051315056 | 5.92E-04 | 3.56E-03 | -0.942644216 |

|               |              |             |              |          |          |              |
|---------------|--------------|-------------|--------------|----------|----------|--------------|
| D730005E14Rik | -0.288404545 | 7.485929021 | -2.443738128 | 2.36E-02 | 6.25E-02 | -4.495452224 |
| Snhg12        | -0.28963134  | 10.12606681 | -3.59208643  | 1.75E-03 | 8.27E-03 | -2.009864511 |
| Arhgef2       | -0.2912857   | 8.722576086 | -3.739644241 | 1.24E-03 | 6.38E-03 | -1.66936364  |
| Parp3         | -0.291891948 | 7.370260213 | -3.23131262  | 4.07E-03 | 1.59E-02 | -2.827842933 |
| Ppfbp2        | -0.292671954 | 7.483509246 | -2.253845729 | 3.52E-02 | 8.57E-02 | -4.861926295 |
| Pnpla2        | -0.29328571  | 8.020311527 | -3.151698054 | 4.89E-03 | 1.84E-02 | -3.004821187 |
| Mthfd2        | -0.293829627 | 9.437257988 | -2.787337253 | 1.12E-02 | 3.50E-02 | -3.793188452 |
| Dennd3        | -0.294063646 | 8.145258638 | -2.193130451 | 3.99E-02 | 9.44E-02 | -4.975376176 |
| Zfp652        | -0.294358199 | 8.087079624 | -2.430187094 | 2.43E-02 | 6.38E-02 | -4.522159039 |
| Arid4a        | -0.29541168  | 9.500167141 | -3.8167037   | 1.03E-03 | 5.54E-03 | -1.490511802 |
| B4galt6       | -0.295955394 | 7.616353071 | -2.507747268 | 2.06E-02 | 5.62E-02 | -4.368215151 |
| Klf6          | -0.297409588 | 9.597114818 | -3.326006053 | 3.27E-03 | 1.35E-02 | -2.615514808 |
| Pstpip1       | -0.297558905 | 8.561788219 | -3.605171789 | 1.70E-03 | 8.09E-03 | -1.9797858   |
| Hcst          | -0.298209061 | 8.750234596 | -2.861397031 | 9.45E-03 | 3.09E-02 | -3.636162543 |
| Stx16         | -0.298731158 | 8.670860697 | -2.803640693 | 1.08E-02 | 3.42E-02 | -3.758776795 |
| Glcc1         | -0.299117722 | 7.947170583 | -2.528112964 | 1.97E-02 | 5.43E-02 | -4.32736523  |
| Mllt6         | -0.299161994 | 7.819269665 | -2.862046623 | 9.44E-03 | 3.09E-02 | -3.634777339 |
| Stat1         | -0.29917864  | 10.24231808 | -3.472015063 | 2.32E-03 | 1.03E-02 | -2.284662952 |
| Trafid1       | -0.300173882 | 9.98069212  | -3.546772069 | 1.95E-03 | 9.04E-03 | -2.113834029 |
| Vrk2          | -0.302510508 | 8.359128097 | -2.552733071 | 1.87E-02 | 5.22E-02 | -4.277751344 |
| Krit1         | -0.302666175 | 8.286597696 | -3.864950912 | 9.21E-04 | 5.06E-03 | -1.378222794 |
| Dusp11        | -0.303657665 | 9.632591157 | -3.682657084 | 1.42E-03 | 7.03E-03 | -1.801195272 |
| Tbc1d9        | -0.30425725  | 9.653421178 | -3.704197486 | 1.35E-03 | 6.79E-03 | -1.751410617 |
| Traf2         | -0.305343415 | 7.593529067 | -3.146835616 | 4.94E-03 | 1.85E-02 | -3.01558157  |
| Ndrp1         | -0.305708992 | 7.647247118 | -2.65427376  | 1.50E-02 | 4.42E-02 | -4.070559546 |
| Zfand6        | -0.306287402 | 9.453075983 | -3.042892046 | 6.27E-03 | 2.22E-02 | -3.244180318 |
| Il2rg         | -0.306297759 | 10.20092691 | -3.253754528 | 3.86E-03 | 1.53E-02 | -2.77769538  |
| Cpd           | -0.307275585 | 7.138861168 | -3.693117713 | 1.38E-03 | 6.90E-03 | -1.777025585 |
| Tspan13       | -0.309148416 | 10.03267696 | -3.536592471 | 2.00E-03 | 9.14E-03 | -2.137147743 |
| Dnajb9        | -0.309339675 | 9.582822841 | -3.1225387   | 5.22E-03 | 1.94E-02 | -3.069262828 |
| Gtpbp2        | -0.309438041 | 8.02549402  | -4.313983208 | 3.18E-04 | 2.24E-03 | -0.325328661 |
| Pex13         | -0.309606053 | 7.690457477 | -2.501830604 | 2.09E-02 | 5.68E-02 | -4.38005016  |
| Stoml1        | -0.309614038 | 7.596365082 | -3.259862599 | 3.81E-03 | 1.51E-02 | -2.764027508 |
| Acvr2a        | -0.309897662 | 7.846643838 | -3.844299069 | 9.67E-04 | 5.27E-03 | -1.426314595 |
| Bmp2k         | -0.30992619  | 10.63906269 | -3.829371859 | 1.00E-03 | 5.41E-03 | -1.46105018  |
| Arhgap25      | -0.310042188 | 8.000823728 | -2.550001394 | 1.88E-02 | 5.25E-02 | -4.283268466 |
| Use1          | -0.3101026   | 11.05664512 | -3.197212836 | 4.40E-03 | 1.69E-02 | -2.903824767 |
| Ptk2b         | -0.310735811 | 8.310747496 | -2.974955344 | 7.32E-03 | 2.52E-02 | -3.39203222  |
| Atf3          | -0.310825557 | 9.381658997 | -2.482213196 | 2.18E-02 | 5.88E-02 | -4.419183866 |
| Map4          | -0.310946592 | 8.686825366 | -3.629206782 | 1.61E-03 | 7.78E-03 | -1.924475245 |
| Arap1         | -0.312149663 | 7.212967377 | -3.118611505 | 5.27E-03 | 1.95E-02 | -3.077925778 |
| Myb           | -0.313346317 | 8.313497545 | -3.462788642 | 2.37E-03 | 1.04E-02 | -2.30568305  |
| Lrrk1         | -0.314237228 | 9.569106877 | -4.058380825 | 5.82E-04 | 3.53E-03 | -0.926081415 |
| Clic4         | -0.314786255 | 10.61398822 | -3.563133333 | 1.88E-03 | 8.77E-03 | -2.076329788 |
| Atp6v0c-ps2   | -0.31576878  | 9.775275537 | -2.650077236 | 1.51E-02 | 4.44E-02 | -4.079201895 |
| Kynu          | -0.315921804 | 9.500901259 | -4.570612207 | 1.73E-04 | 1.38E-03 | 0.2793797    |
| Gyg           | -0.316392143 | 9.883210275 | -3.031531748 | 6.43E-03 | 2.27E-02 | -3.268992921 |
| Trps1         | -0.316419555 | 8.058831658 | -3.581258311 | 1.80E-03 | 8.45E-03 | -2.034736073 |
| Aff3          | -0.316703234 | 7.048278479 | -2.534637419 | 1.94E-02 | 5.38E-02 | -4.31424169  |
| Flot1         | -0.317075404 | 7.623460251 | -2.136549142 | 4.48E-02 | 1.03E-01 | -5.079366198 |
| Agpat3        | -0.317337795 | 7.987993737 | -2.928863102 | 8.12E-03 | 2.75E-02 | -3.491592236 |
| S100pbp       | -0.31842281  | 8.08926657  | -3.924796668 | 7.99E-04 | 4.53E-03 | -1.238644235 |
| Tgoln1        | -0.318432105 | 9.000143253 | -3.886793719 | 8.74E-04 | 4.84E-03 | -1.327314939 |
| Cd36          | -0.318576045 | 7.516305538 | -2.157650919 | 4.29E-02 | 9.96E-02 | -5.040783236 |
| Peli1         | -0.318803923 | 9.674905003 | -3.439438564 | 2.51E-03 | 1.08E-02 | -2.358815233 |
| Dock9         | -0.31909815  | 5.981866566 | -2.34091903  | 2.94E-02 | 7.41E-02 | -4.696003632 |
| Ccnl1         | -0.319795688 | 10.23467425 | -4.390227252 | 2.65E-04 | 1.92E-03 | -0.145731712 |
| Clip1         | -0.319914356 | 8.90853155  | -3.32138457  | 3.30E-03 | 1.36E-02 | -2.625920789 |
| Zfp366        | -0.320010886 | 9.313859423 | -3.288012995 | 3.57E-03 | 1.44E-02 | -2.700932715 |
| Slc25a38      | -0.3201759   | 7.544225489 | -4.201712012 | 4.14E-04 | 2.73E-03 | -0.589527769 |
| Tle3          | -0.321194831 | 9.386325261 | -3.352724246 | 3.07E-03 | 1.29E-02 | -2.555271356 |
| Snora31       | -0.32184384  | 10.00919895 | -3.262744091 | 3.78E-03 | 1.50E-02 | -2.757576867 |
| Tap2          | -0.322635443 | 9.052288971 | -4.351703385 | 2.90E-04 | 2.07E-03 | -0.236489869 |
| Lipa          | -0.322644936 | 8.20974465  | -3.019005167 | 6.62E-03 | 2.33E-02 | -3.296312016 |
| Aplp2         | -0.322915062 | 8.942225291 | -4.221390003 | 3.95E-04 | 2.64E-03 | -0.5432506   |
| Sh3pxd2b      | -0.323276414 | 6.489092709 | -2.217656166 | 3.79E-02 | 9.06E-02 | -4.929776642 |
| Cep350        | -0.323653677 | 9.30341734  | -4.722877805 | 1.21E-04 | 1.02E-03 | 0.638036828  |
| Lysmd1        | -0.3237179   | 8.534767984 | -2.118495408 | 4.64E-02 | 1.05E-01 | -5.11218458  |

|               |              |             |              |          |          |              |
|---------------|--------------|-------------|--------------|----------|----------|--------------|
| L3mbtl3       | -0.324020548 | 6.502710149 | -2.314153098 | 3.11E-02 | 7.77E-02 | -4.747401001 |
| Sik2          | -0.324744609 | 8.169961277 | -3.263766033 | 3.77E-03 | 1.50E-02 | -2.755288669 |
| Creg1         | -0.325665235 | 9.204069351 | -4.199727608 | 4.16E-04 | 2.73E-03 | -0.594193722 |
| Fam13b        | -0.327304242 | 8.972103211 | -4.527696631 | 1.91E-04 | 1.51E-03 | 0.178240625  |
| Kif16b        | -0.328083523 | 7.455063103 | -2.68989086  | 1.38E-02 | 4.17E-02 | -3.996943444 |
| Fam53b        | -0.329341425 | 7.776168672 | -3.148087073 | 4.93E-03 | 1.85E-02 | -3.012812695 |
| Tnfrsf18      | -0.330531025 | 8.740497798 | -2.772041677 | 1.15E-02 | 3.61E-02 | -3.825390772 |
| Limd2         | -0.332469046 | 8.929954048 | -3.245869177 | 3.93E-03 | 1.55E-02 | -2.795328213 |
| Uba7          | -0.33259696  | 9.028587374 | -4.491328112 | 2.09E-04 | 1.60E-03 | 0.092525386  |
| Dennd4a       | -0.333619647 | 9.615690285 | -4.042424151 | 6.05E-04 | 3.62E-03 | -0.963480956 |
| Kdm6b         | -0.334041167 | 8.228598405 | -2.622229998 | 1.61E-02 | 4.66E-02 | -4.136380287 |
| Rgs10         | -0.334813706 | 7.703669139 | -3.371790482 | 2.94E-03 | 1.24E-02 | -2.512196131 |
| Cdc42ep3      | -0.335494849 | 9.148667672 | -3.190095439 | 4.47E-03 | 1.71E-02 | -2.91965031  |
| Lix1l         | -0.336108863 | 7.033023825 | -2.362190798 | 2.81E-02 | 7.15E-02 | -4.654913293 |
| Rasip1        | -0.336313402 | 6.153926783 | -2.659891379 | 1.48E-02 | 4.38E-02 | -4.058980161 |
| D930015E06Rik | -0.336321398 | 10.40792802 | -4.199714152 | 4.16E-04 | 2.73E-03 | -0.594225362 |
| Hgd           | -0.336817895 | 5.382994489 | -2.165835955 | 4.22E-02 | 9.83E-02 | -5.02575323  |
| Ubash3b       | -0.336922212 | 7.660277122 | -2.897055274 | 8.73E-03 | 2.91E-02 | -3.559927317 |
| Gramd1a       | -0.337061173 | 8.32618794  | -3.74774834  | 1.21E-03 | 6.27E-03 | -1.650584923 |
| St14          | -0.337113771 | 6.100646941 | -2.236657091 | 3.65E-02 | 8.79E-02 | -4.894235745 |
| Ncoa7         | -0.337976316 | 8.252287709 | -3.390044819 | 2.81E-03 | 1.20E-02 | -2.470890337 |
| Nup93         | -0.338526329 | 8.17604901  | -4.780580627 | 1.05E-04 | 9.05E-04 | 0.773823068  |
| Ier5          | -0.338630803 | 9.458613193 | -3.764092408 | 1.17E-03 | 6.13E-03 | -1.612690154 |
| Dstn          | -0.341116453 | 9.509330842 | -4.040371432 | 6.08E-04 | 3.63E-03 | -0.968291014 |
| Rabgef1       | -0.341283384 | 8.215492019 | -2.865710447 | 9.36E-03 | 3.07E-02 | -3.626962009 |
| Gramd2        | -0.341513438 | 4.99572626  | -2.343210626 | 2.92E-02 | 7.40E-02 | -4.691587275 |
| Vwa5a         | -0.343321287 | 9.159014234 | -4.689012985 | 1.31E-04 | 1.10E-03 | 0.558306222  |
| Eml6          | -0.34413973  | 7.435132559 | -3.284822449 | 3.59E-03 | 1.44E-02 | -2.708092277 |
| Ifi27         | -0.344345493 | 8.284228093 | -2.888783775 | 8.89E-03 | 2.96E-02 | -3.577646738 |
| Mif4gd        | -0.344364264 | 7.642641722 | -2.99650844  | 6.97E-03 | 2.42E-02 | -3.345265746 |
| Zbtb37        | -0.345308759 | 7.221477456 | -2.655041539 | 1.49E-02 | 4.42E-02 | -4.068977656 |
| Cep70         | -0.346881635 | 7.049002245 | -2.397695132 | 2.61E-02 | 6.74E-02 | -4.585859435 |
| AW549877      | -0.346961076 | 8.216257921 | -4.015443165 | 6.45E-04 | 3.83E-03 | -1.026682909 |
| H2-K1         | -0.347033213 | 11.6412621  | -4.79074956  | 1.03E-04 | 8.89E-04 | 0.797742531  |
| Rhbdf2        | -0.347402004 | 6.90086526  | -2.911224147 | 8.45E-03 | 2.84E-02 | -3.529525369 |
| Fmn12         | -0.347483672 | 9.424976127 | -4.671236775 | 1.36E-04 | 1.13E-03 | 0.51644419   |
| Sdhaf1        | -0.347979333 | 8.451404962 | -3.34599031  | 3.12E-03 | 1.30E-02 | -2.570468115 |
| Crispld2      | -0.34859788  | 6.203753672 | -2.123302192 | 4.60E-02 | 1.05E-01 | -5.103464095 |
| Ogt           | -0.351026092 | 9.621394033 | -3.315217568 | 3.35E-03 | 1.37E-02 | -2.639800028 |
| Ttyh3         | -0.354028629 | 9.764569633 | -5.317355674 | 3.01E-05 | 3.34E-04 | 2.029781214  |
| Cdk17         | -0.355550892 | 8.28047828  | -2.841971914 | 9.87E-03 | 3.19E-02 | -3.677522577 |
| Gm3650        | -0.356282483 | 8.347979439 | -2.529593322 | 1.96E-02 | 5.42E-02 | -4.324389132 |
| Nfkb2         | -0.356380595 | 9.151319051 | -4.440479387 | 2.35E-04 | 1.75E-03 | -0.027314829 |
| Il10ra        | -0.356877725 | 9.539337693 | -4.095031725 | 5.34E-04 | 3.30E-03 | -0.840121511 |
| Sgpl1         | -0.357586941 | 9.122644762 | -4.873541819 | 8.47E-05 | 7.54E-04 | 0.992356216  |
| Naip5         | -0.358495477 | 8.110632216 | -2.291890841 | 3.25E-02 | 8.04E-02 | -4.789886329 |
| Nfkbie        | -0.359196929 | 9.770662543 | -4.166172699 | 4.51E-04 | 2.91E-03 | -0.673067733 |
| A530032D15Rik | -0.360211684 | 9.332967056 | -3.135057746 | 5.08E-03 | 1.89E-02 | -3.041621607 |
| Thbs4         | -0.36115946  | 5.005515343 | -2.176959288 | 4.12E-02 | 9.66E-02 | -5.005270557 |
| Gsap          | -0.361688746 | 9.214472884 | -3.595847999 | 1.74E-03 | 8.23E-03 | -2.001220459 |
| Kdm5b         | -0.362144564 | 7.352220996 | -3.617764906 | 1.65E-03 | 7.94E-03 | -1.950815836 |
| Fbxw17        | -0.362320909 | 7.49126675  | -3.453516035 | 2.43E-03 | 1.06E-02 | -2.32679377  |
| Atp8a1        | -0.364365644 | 8.247189182 | -4.162039557 | 4.55E-04 | 2.94E-03 | -0.682779779 |
| Dnmbp         | -0.365245847 | 6.875853083 | -2.341751696 | 2.93E-02 | 7.41E-02 | -4.69439921  |
| Gtpbp1        | -0.367840396 | 9.612021093 | -3.469542394 | 2.34E-03 | 1.03E-02 | -2.290297724 |
| Dennd1c       | -0.369201414 | 8.407239784 | -3.054467339 | 6.11E-03 | 2.17E-02 | -3.218862299 |
| Msi2          | -0.371467883 | 8.694893584 | -3.954046504 | 7.46E-04 | 4.25E-03 | -1.170315922 |
| Tbc1d8        | -0.373521098 | 10.30723254 | -3.973752813 | 7.12E-04 | 4.09E-03 | -1.124244189 |
| Dram2         | -0.373945805 | 7.549955651 | -2.639400628 | 1.55E-02 | 4.52E-02 | -4.101159184 |
| Gsdmd         | -0.374376026 | 9.18949689  | -4.912290836 | 7.73E-05 | 7.06E-04 | 1.083350748  |
| Scal          | -0.375481827 | 7.448338072 | -4.493761373 | 2.07E-04 | 1.60E-03 | 0.098260259  |
| Fuca1         | -0.376153697 | 10.70535348 | -4.957980442 | 6.95E-05 | 6.55E-04 | 1.190560415  |
| Katna1        | -0.37818511  | 9.570122243 | -2.814401377 | 1.05E-02 | 3.37E-02 | -3.736015381 |
| Neat1         | -0.378859818 | 10.1294555  | -3.609048798 | 1.68E-03 | 8.05E-03 | -1.970869253 |
| Mcemp1        | -0.379416645 | 8.716568471 | -4.214113561 | 4.02E-04 | 2.67E-03 | -0.560364443 |
| Tpp1          | -0.380268151 | 7.566488397 | -3.286565165 | 3.58E-03 | 1.44E-02 | -2.704181899 |
| Epb4.1l2      | -0.380463587 | 9.68981099  | -4.068423827 | 5.68E-04 | 3.49E-03 | -0.902534564 |
| Zfp361l       | -0.380784353 | 11.69348317 | -5.250904139 | 3.51E-05 | 3.80E-04 | 1.875228257  |

|               |              |             |              |          |          |              |
|---------------|--------------|-------------|--------------|----------|----------|--------------|
| H2-Ob         | -0.38195752  | 7.88379445  | -2.147608953 | 4.38E-02 | 1.01E-01 | -5.059174096 |
| Mylip         | -0.382248027 | 8.612815351 | -3.871653726 | 9.06E-04 | 5.00E-03 | -1.362605492 |
| Herc6         | -0.383075933 | 8.480791638 | -3.700265769 | 1.36E-03 | 6.83E-03 | -1.760501944 |
| Rnf11         | -0.3847152   | 7.894148149 | -3.373213402 | 2.93E-03 | 1.24E-02 | -2.508978618 |
| Mex3b         | -0.38570312  | 7.265464399 | -2.536602216 | 1.94E-02 | 5.37E-02 | -4.310286162 |
| Nampt         | -0.386091998 | 8.165847889 | -4.480720342 | 2.14E-04 | 1.63E-03 | 0.067524342  |
| Ddhd1         | -0.387877136 | 10.16701978 | -4.454236538 | 2.28E-04 | 1.70E-03 | 0.005106941  |
| B630005N14Rik | -0.38895922  | 9.858335367 | -4.455890597 | 2.27E-04 | 1.70E-03 | 0.009005169  |
| Polg2         | -0.389144836 | 7.408760038 | -2.70599184  | 1.34E-02 | 4.06E-02 | -3.963510804 |
| Dusp6         | -0.390216736 | 7.301248296 | -2.192583867 | 4.00E-02 | 9.44E-02 | -4.976388847 |
| Prr14         | -0.391111984 | 9.106605547 | -4.618924007 | 1.54E-04 | 1.25E-03 | 0.393216742  |
| Gfpt1         | -0.391698433 | 9.684916274 | -4.510149661 | 1.99E-04 | 1.56E-03 | 0.136885255  |
| Nbeal1        | -0.39214882  | 7.41568612  | -4.102065675 | 5.25E-04 | 3.27E-03 | -0.823615712 |
| Mir5107       | -0.39486893  | 10.20298079 | -3.520537763 | 2.07E-03 | 9.40E-03 | -2.173884205 |
| Krtcap3       | -0.395427104 | 7.046032349 | -3.048956058 | 6.18E-03 | 2.20E-02 | -3.230921316 |
| Suco          | -0.395755503 | 8.796939137 | -3.794668319 | 1.09E-03 | 5.79E-03 | -1.541719592 |
| Ace2          | -0.396018079 | 5.596206375 | -2.811999489 | 1.06E-02 | 3.38E-02 | -3.741099292 |
| Slc25a35      | -0.396997904 | 7.576866351 | -3.158897812 | 4.81E-03 | 1.81E-02 | -2.988877895 |
| Itpr2         | -0.397243211 | 7.687540401 | -3.701370939 | 1.36E-03 | 6.83E-03 | -1.757946645 |
| Jup           | -0.397578847 | 7.878903307 | -2.685221607 | 1.40E-02 | 4.21E-02 | -4.006621065 |
| Nod1          | -0.397633136 | 7.350378131 | -2.972121744 | 7.36E-03 | 2.53E-02 | -3.398170752 |
| Tnfsf9        | -0.398082043 | 7.050427487 | -2.703713173 | 1.34E-02 | 4.07E-02 | -3.968248053 |
| Pias3         | -0.399773086 | 8.031485068 | -3.580702569 | 1.80E-03 | 8.45E-03 | -2.03601212  |
| Cbx7          | -0.400167142 | 7.649549545 | -3.088796191 | 5.64E-03 | 2.05E-02 | -3.143567824 |
| Tap1          | -0.400359516 | 10.17986499 | -6.414203194 | 2.54E-06 | 4.75E-05 | 4.521634279  |
| Cd200         | -0.400777154 | 7.847900744 | -2.895693893 | 8.75E-03 | 2.92E-02 | -3.562845161 |
| Usp32         | -0.40190692  | 8.434299231 | -5.980945275 | 6.64E-06 | 1.03E-04 | 3.552334786  |
| St8sia6       | -0.40270823  | 7.887947463 | -2.245438192 | 3.58E-02 | 8.69E-02 | -4.877748615 |
| Mpp5          | -0.402828506 | 7.734066744 | -3.918085501 | 8.12E-04 | 4.56E-03 | -1.25431197  |
| Slc8b1        | -0.403261693 | 8.684286706 | -4.287391891 | 3.38E-04 | 2.35E-03 | -0.387937393 |
| Clec2i        | -0.403382535 | 8.423080457 | -2.78405434  | 1.12E-02 | 3.52E-02 | -3.800106816 |
| Ppfibp1       | -0.405718542 | 8.098501127 | -4.5661471   | 1.75E-04 | 1.39E-03 | 0.268857371  |
| Kcnk6         | -0.40643     | 8.720180906 | -3.776652452 | 1.13E-03 | 5.98E-03 | -1.583548857 |
| Nck2          | -0.408863946 | 8.409463978 | -2.708888894 | 1.33E-02 | 4.04E-02 | -3.957485233 |
| LOC102636131  | -0.409101217 | 5.690353138 | -3.010173037 | 6.75E-03 | 2.36E-02 | -3.315547899 |
| Sfi1          | -0.409945    | 7.4496034   | -3.910415869 | 8.27E-04 | 4.63E-03 | -1.272212743 |
| Birc3         | -0.410816325 | 10.86469779 | -5.252229149 | 3.50E-05 | 3.80E-04 | 1.878313047  |
| Rnf19a        | -0.411029242 | 8.763980654 | -2.378840751 | 2.71E-02 | 6.96E-02 | -4.622602775 |
| Nuak2         | -0.411290324 | 8.188889694 | -3.365805766 | 2.98E-03 | 1.25E-02 | -2.525724571 |
| Gpcpd1        | -0.411510319 | 9.404185707 | -4.24730145  | 3.72E-04 | 2.53E-03 | -0.482293107 |
| Spg11         | -0.411704445 | 7.919803895 | -4.094241993 | 5.35E-04 | 3.30E-03 | -0.841974522 |
| Zfp189        | -0.413425908 | 6.913289242 | -2.45108018  | 2.33E-02 | 6.18E-02 | -4.480948269 |
| A030001D20Rik | -0.414707449 | 6.185188271 | -2.099858094 | 4.82E-02 | 1.09E-01 | -5.145876399 |
| Lima1         | -0.417149256 | 7.392467967 | -2.921226589 | 8.26E-03 | 2.79E-02 | -3.508026353 |
| Flnb          | -0.417173584 | 8.919780202 | -5.423028107 | 2.36E-05 | 2.78E-04 | 2.27486984   |
| Fut8          | -0.41740465  | 8.170669602 | -5.78619005  | 1.03E-05 | 1.47E-04 | 3.109845312  |
| Rel           | -0.417851315 | 10.67593003 | -3.759746885 | 1.18E-03 | 6.16E-03 | -1.622768429 |
| Fbxo11        | -0.418542195 | 9.53830609  | -6.033197597 | 5.91E-06 | 9.29E-05 | 3.67036737   |
| Gm11545       | -0.418778369 | 8.392483298 | -2.097347109 | 4.85E-02 | 1.09E-01 | -5.150400992 |
| Nxf1          | -0.419322254 | 10.45560388 | -6.270021737 | 3.49E-06 | 6.12E-05 | 4.201487776  |
| Cyp27a1       | -0.419361321 | 9.232841609 | -4.869853645 | 8.54E-05 | 7.56E-04 | 0.983692076  |
| Ggt5          | -0.419907894 | 4.793938291 | -2.200460456 | 3.93E-02 | 9.35E-02 | -4.9617806   |
| Zfp263        | -0.42260322  | 7.414723533 | -3.613031077 | 1.67E-03 | 8.01E-03 | -1.961708412 |
| Car13         | -0.422745178 | 5.76917305  | -2.403807605 | 2.57E-02 | 6.66E-02 | -4.573912483 |
| Lpin1         | -0.422817854 | 6.722122094 | -2.365859486 | 2.79E-02 | 7.11E-02 | -4.647805025 |
| Pi4k2a        | -0.4233725   | 8.386356246 | -4.882954933 | 8.28E-05 | 7.45E-04 | 1.01446675   |
| Adam19        | -0.42456021  | 8.950181306 | -5.332622909 | 2.91E-05 | 3.25E-04 | 2.065244036  |
| Cpeb4         | -0.425178404 | 8.502568545 | -5.196335574 | 3.99E-05 | 4.22E-04 | 1.748081019  |
| Tas1r3        | -0.426546603 | 5.861095658 | -2.734139192 | 1.26E-02 | 3.87E-02 | -3.904839297 |
| Zufsp         | -0.427100449 | 8.950817547 | -5.936549489 | 7.34E-06 | 1.11E-04 | 3.451816957  |
| Dirc2         | -0.427184076 | 7.017556715 | -3.071413397 | 5.87E-03 | 2.11E-02 | -3.181732687 |
| Atp6v0a1      | -0.427921402 | 8.312829673 | -3.713209378 | 1.32E-03 | 6.67E-03 | -1.730565322 |
| Map3k14       | -0.429847413 | 8.625553068 | -4.277644811 | 3.46E-04 | 2.38E-03 | -0.410882118 |
| Scpep1        | -0.430776999 | 10.12671836 | -4.965695325 | 6.82E-05 | 6.45E-04 | 1.208653742  |
| Mir1931       | -0.431096128 | 6.203462568 | -2.156823479 | 4.30E-02 | 9.97E-02 | -5.042300655 |
| Nfkbia        | -0.432601985 | 11.18519394 | -6.642313951 | 1.55E-06 | 3.21E-05 | 5.022956071  |
| H2-K2         | -0.432641349 | 7.851857606 | -3.032695114 | 6.42E-03 | 2.27E-02 | -3.266453567 |
| Camk2d        | -0.432864881 | 7.126427314 | -3.738206766 | 1.24E-03 | 6.40E-03 | -1.672693757 |



|               |              |             |              |          |          |              |
|---------------|--------------|-------------|--------------|----------|----------|--------------|
| 4632428N05Rik | -0.433019728 | 8.291762172 | -5.452661056 | 2.20E-05 | 2.70E-04 | 2.343438804  |
| Cst7          | -0.433398222 | 6.569860835 | -2.197740143 | 3.95E-02 | 9.37E-02 | -4.966829466 |
| Pcgf5         | -0.43375959  | 8.410066276 | -3.265217097 | 3.76E-03 | 1.50E-02 | -2.752039253 |
| Rassf2        | -0.433955483 | 8.984512911 | -3.765361873 | 1.17E-03 | 6.12E-03 | -1.609745576 |
| Galnt7        | -0.434090733 | 9.069237934 | -5.354174342 | 2.77E-05 | 3.14E-04 | 2.115273854  |
| Bcl3          | -0.434298614 | 9.160843434 | -3.518849357 | 2.08E-03 | 9.43E-03 | -2.177745272 |
| Acp2          | -0.435984825 | 8.104161769 | -2.90213626  | 8.63E-03 | 2.89E-02 | -3.549032209 |
| Dok1          | -0.436106739 | 7.398253906 | -3.094288729 | 5.57E-03 | 2.03E-02 | -3.131492378 |
| Trim35        | -0.436318823 | 8.131212981 | -6.316330678 | 3.15E-06 | 5.58E-05 | 4.304584753  |
| Stxbp3a       | -0.439243658 | 9.524176453 | -4.066227048 | 5.71E-04 | 3.49E-03 | -0.907685648 |
| Nr4a1         | -0.442972821 | 9.232516331 | -2.846595792 | 9.77E-03 | 3.16E-02 | -3.667688413 |
| Ankrd12       | -0.442994551 | 8.381190505 | -3.755846246 | 1.19E-03 | 6.19E-03 | -1.631813136 |
| Eli2          | -0.443302406 | 9.00578349  | -5.361222373 | 2.72E-05 | 3.10E-04 | 2.131627549  |
| LOC102632708  | -0.444470345 | 5.887268374 | -2.216063563 | 3.81E-02 | 9.09E-02 | -4.932747158 |
| Tnfrsf11a     | -0.444676939 | 7.473995635 | -3.101977541 | 5.48E-03 | 2.00E-02 | -3.11457538  |
| Tmem64        | -0.445529147 | 7.521046326 | -2.996893879 | 6.96E-03 | 2.42E-02 | -3.34442821  |
| Tnfp1         | -0.446135725 | 8.514109516 | -5.384040338 | 2.58E-05 | 2.99E-04 | 2.184546112  |
| Lilrb4        | -0.44626106  | 8.476135627 | -2.455536527 | 2.30E-02 | 6.14E-02 | -4.472133332 |
| Pnpla7        | -0.446737388 | 6.349281468 | -4.367060844 | 2.80E-04 | 2.01E-03 | -0.200312122 |
| Lcp2          | -0.448493127 | 9.742275422 | -2.829359852 | 1.02E-02 | 3.27E-02 | -3.704310871 |
| Parp4         | -0.448670034 | 8.761551488 | -5.101720063 | 4.97E-05 | 4.98E-04 | 1.527163614  |
| Ppef2         | -0.448929906 | 6.291472617 | -2.243913399 | 3.59E-02 | 8.71E-02 | -4.880614328 |
| H2-Q4         | -0.449162929 | 8.183913814 | -4.555656379 | 1.79E-04 | 1.42E-03 | 0.244134654  |
| Ppm1h         | -0.449166237 | 8.583667396 | -4.007489542 | 6.57E-04 | 3.88E-03 | -1.045304829 |
| Dpp7          | -0.449341708 | 7.18402913  | -2.17418093  | 4.15E-02 | 9.71E-02 | -5.010392814 |
| Gpr157        | -0.44990589  | 8.377502606 | -4.86623558  | 8.62E-05 | 7.59E-04 | 0.975192116  |
| Htra2         | -0.450220394 | 10.20388944 | -5.150013465 | 4.44E-05 | 4.58E-04 | 1.639993664  |
| Ric1          | -0.450244899 | 8.669532826 | -4.159646877 | 4.58E-04 | 2.95E-03 | -0.688401749 |
| Stx11         | -0.450334543 | 6.705081303 | -4.21209339  | 4.04E-04 | 2.68E-03 | -0.565115446 |
| Mir674        | -0.450498072 | 6.774024287 | -2.355493442 | 2.85E-02 | 7.24E-02 | -4.667873481 |
| Abi3          | -0.451081306 | 7.532042125 | -3.472451457 | 2.32E-03 | 1.03E-02 | -2.28366838  |
| Slc22a18      | -0.451271023 | 6.684383083 | -2.458990026 | 2.29E-02 | 6.10E-02 | -4.465296096 |
| Avpi1         | -0.451503392 | 8.515324833 | -3.489956926 | 2.23E-03 | 9.95E-03 | -2.243746027 |
| Pde1b         | -0.45185766  | 7.49661626  | -2.588331921 | 1.73E-02 | 4.93E-02 | -4.205576247 |
| LOC73899      | -0.451859372 | 8.472098309 | -3.528990397 | 2.03E-03 | 9.26E-03 | -2.154547868 |
| Plekhb2       | -0.452010932 | 8.491843308 | -4.509119275 | 2.00E-04 | 1.56E-03 | 0.134456782  |
| Plk3          | -0.453262553 | 6.219663783 | -2.434903339 | 2.41E-02 | 6.33E-02 | -4.512873382 |
| Hsd17b11      | -0.453558025 | 9.553483754 | -4.363750146 | 2.82E-04 | 2.03E-03 | -0.20811151  |
| Havcr2        | -0.453899756 | 7.995881211 | -3.34431001  | 3.13E-03 | 1.30E-02 | -2.574258735 |
| Cdc14a        | -0.454310477 | 8.86376701  | -6.056181927 | 5.61E-06 | 8.89E-05 | 3.722191678  |
| Suox          | -0.454518824 | 7.699592444 | -3.761589584 | 1.18E-03 | 6.15E-03 | -1.618495039 |
| Pirb          | -0.457181485 | 9.8244488   | -4.534786319 | 1.88E-04 | 1.49E-03 | 0.19494959   |
| Ppp4r2        | -0.458558153 | 9.99914904  | -3.218875221 | 4.19E-03 | 1.62E-02 | -2.855586735 |
| Rabgap1l      | -0.459017933 | 8.209510415 | -4.47745868  | 2.16E-04 | 1.63E-03 | 0.059837093  |
| Gm4651        | -0.459788247 | 6.078918018 | -2.218405174 | 3.79E-02 | 9.06E-02 | -4.928379143 |
| Trio          | -0.463250385 | 8.673700567 | -5.741457728 | 1.14E-05 | 1.60E-04 | 3.007664038  |
| Tbc1d10a      | -0.463402135 | 6.491908451 | -2.558477685 | 1.85E-02 | 5.18E-02 | -4.266139097 |
| Srgn          | -0.463406793 | 11.24575118 | -6.095917929 | 5.14E-06 | 8.20E-05 | 3.811648615  |
| Bcl2a1a       | -0.463827282 | 10.52265101 | -3.351332193 | 3.08E-03 | 1.29E-02 | -2.558413587 |
| Ltc4s         | -0.464880904 | 6.708749541 | -2.580956769 | 1.76E-02 | 4.99E-02 | -4.220570924 |
| Rnf115        | -0.465095515 | 10.36184594 | -5.118930803 | 4.77E-05 | 4.83E-04 | 1.567390049  |
| Cdc42ep2      | -0.465128043 | 6.821108363 | -2.720117537 | 1.30E-02 | 3.96E-02 | -3.934102161 |
| Nfe2l1        | -0.465313889 | 9.02767145  | -5.443730261 | 2.25E-05 | 2.73E-04 | 2.322781042  |
| Ssh1          | -0.465566807 | 7.864040393 | -4.530562676 | 1.90E-04 | 1.50E-03 | 0.184995338  |
| Slc12a2       | -0.46622038  | 6.947475412 | -3.211216325 | 4.26E-03 | 1.65E-02 | -2.872653889 |
| Arhgap22      | -0.467293787 | 6.822421678 | -3.831885079 | 9.96E-04 | 5.39E-03 | -1.455203438 |
| Gpr132        | -0.46794573  | 9.477460002 | -4.376329369 | 2.74E-04 | 1.98E-03 | -0.178476281 |
| Cdk14         | -0.468830625 | 8.095736195 | -3.294917905 | 3.51E-03 | 1.42E-02 | -2.685430862 |
| Mical2        | -0.469218832 | 5.712521307 | -2.603163612 | 1.67E-02 | 4.80E-02 | -4.175355988 |
| Ptpn21        | -0.470787398 | 7.046424588 | -3.532204593 | 2.02E-03 | 9.21E-03 | -2.147192103 |
| 4930562F07Rik | -0.472036245 | 8.659146986 | -3.295703098 | 3.50E-03 | 1.42E-02 | -2.683667439 |
| Smurf1        | -0.474109211 | 7.884457162 | -4.704834432 | 1.26E-04 | 1.06E-03 | 0.595559206  |
| Sort1         | -0.474614537 | 8.232147634 | -5.127130412 | 4.68E-05 | 4.77E-04 | 1.586548637  |
| Lpp           | -0.476329195 | 7.518762087 | -3.673690707 | 1.45E-03 | 7.16E-03 | -1.821901516 |
| Smpd3a        | -0.479412712 | 7.934927589 | -4.665785224 | 1.38E-04 | 1.14E-03 | 0.503604809  |
| Mamlid1       | -0.479421753 | 5.965600832 | -3.654102398 | 1.51E-03 | 7.41E-03 | -1.867101448 |
| Nfat5         | -0.480847329 | 8.502267883 | -4.500447548 | 2.04E-04 | 1.58E-03 | 0.114018694  |
| Slc33a1       | -0.481322023 | 8.501209182 | -4.309812568 | 3.21E-04 | 2.26E-03 | -0.335149494 |

|               |              |             |              |          |          |              |
|---------------|--------------|-------------|--------------|----------|----------|--------------|
| Ly96          | -0.482313132 | 7.823256782 | -4.905342802 | 7.86E-05 | 7.12E-04 | 1.067039249  |
| Dusp5         | -0.482703585 | 7.654534895 | -3.562658368 | 1.88E-03 | 8.77E-03 | -2.077419099 |
| Ktn1          | -0.483407915 | 8.698810043 | -5.742710927 | 1.14E-05 | 1.60E-04 | 3.010529393  |
| Icosl         | -0.484791679 | 10.35968984 | -7.182283279 | 4.92E-07 | 1.22E-05 | 6.183115889  |
| Sult1a1       | -0.48504558  | 6.841788588 | -3.40532777  | 2.71E-03 | 1.16E-02 | -2.436260399 |
| Chd2          | -0.485876719 | 8.829140919 | -5.521145959 | 1.88E-05 | 2.39E-04 | 2.501627937  |
| Zfc3h1        | -0.48799827  | 9.842032054 | -5.184268982 | 4.10E-05 | 4.33E-04 | 1.719938357  |
| Rbm47         | -0.488660916 | 7.592938741 | -4.408943904 | 2.54E-04 | 1.85E-03 | -0.101629781 |
| Polr3c        | -0.489010622 | 9.077878641 | -6.242060068 | 3.71E-06 | 6.42E-05 | 4.139114685  |
| Ephx1         | -0.490678428 | 6.46295913  | -3.19056884  | 4.47E-03 | 1.71E-02 | -2.918598066 |
| Gngt2         | -0.491080563 | 7.195538512 | -3.393463719 | 2.79E-03 | 1.19E-02 | -2.463147135 |
| Rras2         | -0.492303297 | 8.744742223 | -5.517482476 | 1.90E-05 | 2.40E-04 | 2.493176031  |
| Klf5          | -0.497596638 | 6.150367579 | -2.443286474 | 2.36E-02 | 6.25E-02 | -4.496343672 |
| Tmem27        | -0.498006526 | 4.681300129 | -2.546445316 | 1.89E-02 | 5.27E-02 | -4.290446035 |
| A930002C04Rik | -0.498241075 | 5.246281794 | -2.697187464 | 1.36E-02 | 4.12E-02 | -3.981804257 |
| B230398E01Rik | -0.498467798 | 9.002483335 | -3.535681878 | 2.00E-03 | 9.15E-03 | -2.139232441 |
| Txndc17       | -0.498636182 | 10.44803205 | -5.877732829 | 8.37E-06 | 1.25E-04 | 3.318325716  |
| Zrsr1         | -0.502249373 | 6.209299522 | -3.800295004 | 1.07E-03 | 5.72E-03 | -1.528648546 |
| Myo1h         | -0.502354847 | 6.324608214 | -2.875463178 | 9.16E-03 | 3.03E-02 | -3.606137654 |
| Pnpla8        | -0.502383559 | 7.78327041  | -3.440371257 | 2.50E-03 | 1.08E-02 | -2.35669474  |
| Zfp318        | -0.502850733 | 8.914553586 | -5.856269596 | 8.79E-06 | 1.29E-04 | 3.269522264  |
| Cd300ld       | -0.504587676 | 5.882217167 | -2.769178331 | 1.16E-02 | 3.62E-02 | -3.831410168 |
| Glul          | -0.504762705 | 8.690119744 | -5.987889774 | 6.54E-06 | 1.02E-04 | 3.568038829  |
| Itgb8         | -0.505428192 | 6.234621951 | -2.24267565  | 3.60E-02 | 8.72E-02 | -4.8829397   |
| Slc22a21      | -0.506870978 | 6.600686177 | -3.115835881 | 5.31E-03 | 1.96E-02 | -3.084046159 |
| Cblb          | -0.507162892 | 10.33819136 | -3.940556945 | 7.70E-04 | 4.38E-03 | -1.201836274 |
| Ffar4         | -0.508468577 | 8.095909744 | -4.499982866 | 2.04E-04 | 1.58E-03 | 0.112923501  |
| Gm6377        | -0.509379131 | 8.684248536 | -3.756601717 | 1.19E-03 | 6.19E-03 | -1.6300615   |
| 2010016118Rik | -0.509673177 | 6.393384761 | -2.942968551 | 7.87E-03 | 2.68E-02 | -3.461190735 |
| Dgka          | -0.510784813 | 7.738730648 | -3.065646047 | 5.95E-03 | 2.13E-02 | -3.194377752 |
| Khynyn        | -0.512151933 | 7.609393393 | -5.655416228 | 1.39E-05 | 1.87E-04 | 2.810572468  |
| Arhgap31      | -0.517258182 | 9.032510211 | -4.476836134 | 2.16E-04 | 1.63E-03 | 0.058369848  |
| Snora44       | -0.52047166  | 7.759145923 | -2.804750855 | 1.07E-02 | 3.42E-02 | -3.756430325 |
| Sh3bp4        | -0.522382071 | 7.035105826 | -4.292530772 | 3.34E-04 | 2.33E-03 | -0.37583939  |
| Sox4          | -0.523432272 | 6.115738839 | -2.783985331 | 1.12E-02 | 3.52E-02 | -3.800252205 |
| Swap70        | -0.524782184 | 9.313710833 | -4.87768923  | 8.39E-05 | 7.51E-04 | 1.002098537  |
| BC051537      | -0.524826764 | 7.018358814 | -4.112089448 | 5.13E-04 | 3.21E-03 | -0.800089474 |
| Ahr           | -0.524835345 | 7.982569263 | -4.119475827 | 5.04E-04 | 3.16E-03 | -0.78274998  |
| Hspbp1        | -0.526138959 | 6.230607685 | -2.877535092 | 9.12E-03 | 3.02E-02 | -3.601709767 |
| Arg2          | -0.526411587 | 5.833276439 | -2.124499962 | 4.59E-02 | 1.05E-01 | -5.101289129 |
| Slc22a23      | -0.526768244 | 7.456132298 | -2.99132435  | 7.05E-03 | 2.44E-02 | -3.356526391 |
| Irf4          | -0.52678632  | 7.426673453 | -3.178786625 | 4.59E-03 | 1.74E-02 | -2.944771167 |
| Ppt2          | -0.528057618 | 7.402863745 | -2.549718878 | 1.88E-02 | 5.25E-02 | -4.283838885 |
| N4bp2l1       | -0.528267761 | 9.087434618 | -5.270605423 | 3.35E-05 | 3.66E-04 | 1.921082597  |
| Ntng2         | -0.528845346 | 8.471673925 | -3.187924342 | 4.50E-03 | 1.71E-02 | -2.924475401 |
| 4930455G09Rik | -0.52922346  | 6.326760136 | -2.790389719 | 1.11E-02 | 3.49E-02 | -3.786752446 |
| Efna2         | -0.532242809 | 6.619315659 | -3.145974956 | 4.95E-03 | 1.85E-02 | -3.017485577 |
| Rgmb          | -0.533759313 | 7.2767953   | -4.649605521 | 1.43E-04 | 1.18E-03 | 0.465495444  |
| Slc2a6        | -0.535374292 | 7.823917221 | -3.927665049 | 7.94E-04 | 4.50E-03 | -1.231946654 |
| 1700029I15Rik | -0.535932713 | 6.875118788 | -2.46854053  | 2.24E-02 | 6.02E-02 | -4.446360858 |
| Tbc1d4        | -0.536146018 | 7.775308202 | -3.789583162 | 1.10E-03 | 5.82E-03 | -1.553529799 |
| Pygl          | -0.536831057 | 7.853292803 | -3.037294714 | 6.35E-03 | 2.25E-02 | -3.256410112 |
| Crebrf        | -0.539434433 | 8.18442127  | -5.403571146 | 2.47E-05 | 2.89E-04 | 2.229808702  |
| Ctsd          | -0.540594174 | 8.140930245 | -4.437885373 | 2.37E-04 | 1.76E-03 | -0.033428061 |
| Plat          | -0.541010645 | 5.719035877 | -2.206745191 | 3.88E-02 | 9.25E-02 | -4.950101479 |
| Gcnt4         | -0.543448063 | 6.538850641 | -3.310144234 | 3.39E-03 | 1.38E-02 | -2.651212104 |
| Fyb           | -0.545158447 | 10.35410345 | -6.281432777 | 3.40E-06 | 6.00E-05 | 4.226915567  |
| Daam1         | -0.546295618 | 7.58398934  | -6.574290516 | 1.79E-06 | 3.54E-05 | 4.874137589  |
| Gpr52         | -0.546468132 | 6.361261711 | -3.303197266 | 3.44E-03 | 1.40E-02 | -2.66683024  |
| Gbp10         | -0.550119387 | 7.141067292 | -3.077649175 | 5.79E-03 | 2.09E-02 | -3.168050757 |
| Icam1         | -0.550405977 | 9.822749306 | -4.711137957 | 1.24E-04 | 1.05E-03 | 0.610399818  |
| Socs1         | -0.550866363 | 6.977441914 | -3.658105344 | 1.50E-03 | 7.39E-03 | -1.857868708 |
| Rab9          | -0.553237532 | 9.038661827 | -4.14518776  | 4.74E-04 | 3.02E-03 | -0.722370143 |
| Pacsin1       | -0.554549746 | 5.628642607 | -2.379797238 | 2.71E-02 | 6.95E-02 | -4.620742724 |
| Sesn2         | -0.556146821 | 7.213054822 | -4.895215552 | 8.05E-05 | 7.28E-04 | 1.043260427  |
| Anxa4         | -0.556953705 | 9.016721537 | -6.445524513 | 2.37E-06 | 4.52E-05 | 4.590850098  |
| Sp140         | -0.557895362 | 7.380392817 | -2.71635569  | 1.31E-02 | 3.98E-02 | -3.941941076 |
| Sqstm1        | -0.559894417 | 9.503013141 | -6.741136555 | 1.25E-06 | 2.65E-05 | 5.238111892  |

|               |              |             |              |          |          |              |
|---------------|--------------|-------------|--------------|----------|----------|--------------|
| Apobec1       | -0.560133516 | 7.821431361 | -5.046158093 | 5.65E-05 | 5.55E-04 | 1.397182274  |
| Caprin2       | -0.560653459 | 6.906817971 | -3.713845595 | 1.32E-03 | 6.67E-03 | -1.729093327 |
| H2-Oa         | -0.562967675 | 9.86496398  | -6.70565652  | 1.35E-06 | 2.83E-05 | 5.16100818   |
| Rasa2         | -0.564584135 | 8.180808887 | -4.269867371 | 3.53E-04 | 2.42E-03 | -0.429188389 |
| Arhgef3       | -0.567894435 | 7.881024686 | -3.673891579 | 1.45E-03 | 7.16E-03 | -1.82143775  |
| Dtx1          | -0.568743321 | 6.126468786 | -3.075399936 | 5.82E-03 | 2.10E-02 | -3.172986989 |
| Ppp3cc        | -0.570120701 | 6.679372703 | -3.332467167 | 3.22E-03 | 1.33E-02 | -2.600959434 |
| Fcrla         | -0.578044924 | 6.499836691 | -3.654732258 | 1.51E-03 | 7.41E-03 | -1.865648825 |
| Cd80          | -0.578342413 | 8.832254191 | -4.370087686 | 2.78E-04 | 2.01E-03 | -0.193181293 |
| Tmem140       | -0.57943983  | 6.407631326 | -3.478724286 | 2.29E-03 | 1.02E-02 | -2.269368654 |
| Sh3bp5        | -0.579632045 | 6.566644392 | -3.616353585 | 1.66E-03 | 7.96E-03 | -1.95406362  |
| 2310001H17Rik | -0.582011226 | 8.15331373  | -4.280306237 | 3.44E-04 | 2.37E-03 | -0.404617352 |
| Nxpe4         | -0.583178472 | 5.70430767  | -2.594644853 | 1.71E-02 | 4.88E-02 | -4.192724001 |
| Bcl2l1        | -0.583988509 | 6.717639828 | -3.752349057 | 1.20E-03 | 6.23E-03 | -1.639920886 |
| 4930412F12Rik | -0.584403148 | 6.185930048 | -4.422448533 | 2.46E-04 | 1.80E-03 | -0.069806523 |
| Ttyh2         | -0.587216335 | 6.335678113 | -4.214545045 | 4.02E-04 | 2.67E-03 | -0.559349668 |
| Plxnc1        | -0.587671253 | 11.14016603 | -6.226076728 | 3.85E-06 | 6.56E-05 | 4.103420124  |
| Pmepa1        | -0.588944313 | 6.190990757 | -4.487775875 | 2.10E-04 | 1.60E-03 | 0.08415324   |
| Mocos         | -0.591866753 | 5.191339313 | -3.914836568 | 8.18E-04 | 4.59E-03 | -1.261895517 |
| Lphn3         | -0.596220687 | 4.470689147 | -2.470747843 | 2.23E-02 | 6.00E-02 | -4.441978891 |
| Clip2         | -0.597738153 | 7.562019024 | -5.550441205 | 1.76E-05 | 2.27E-04 | 2.569171935  |
| Spred1        | -0.598668663 | 8.33953904  | -4.058398198 | 5.82E-04 | 3.53E-03 | -0.926040687 |
| H2-Q6         | -0.598920035 | 10.73244139 | -6.340781641 | 2.99E-06 | 5.36E-05 | 4.358916841  |
| Gm9994        | -0.599159183 | 6.48563562  | -2.98420444  | 7.16E-03 | 2.48E-02 | -3.371979511 |
| Clec2d        | -0.600152602 | 10.52621348 | -7.050585637 | 6.49E-07 | 1.52E-05 | 5.903680877  |
| Chd7          | -0.60127755  | 7.977361565 | -5.86670312  | 8.58E-06 | 1.27E-04 | 3.29325215   |
| Gfpt2         | -0.603022427 | 6.131373732 | -2.17158628  | 4.17E-02 | 9.75E-02 | -5.01517269  |
| Iscu          | -0.604184812 | 9.869137104 | -5.581293343 | 1.64E-05 | 2.14E-04 | 2.640223438  |
| Trim7         | -0.605374296 | 7.669770897 | -6.592272225 | 1.73E-06 | 3.42E-05 | 4.913533662  |
| AW046200      | -0.606142768 | 6.408441906 | -3.358276599 | 3.03E-03 | 1.27E-02 | -2.542734482 |
| Rrad          | -0.606835566 | 7.070788238 | -4.062836508 | 5.76E-04 | 3.50E-03 | -0.915635346 |
| Peg13         | -0.608424515 | 7.102329306 | -4.23377874  | 3.84E-04 | 2.59E-03 | -0.514108554 |
| Hfe           | -0.609183812 | 6.889314049 | -2.908252944 | 8.51E-03 | 2.86E-02 | -3.535905738 |
| Tank          | -0.61039885  | 9.255562733 | -5.143656933 | 4.50E-05 | 4.64E-04 | 1.625150772  |
| Cxcl1         | -0.612149413 | 5.322661922 | -2.341582932 | 2.93E-02 | 7.41E-02 | -4.69472442  |
| D130040H23Rik | -0.612157901 | 6.155933973 | -2.579845967 | 1.76E-02 | 4.99E-02 | -4.22282745  |
| Cmah          | -0.614786819 | 5.646292456 | -2.219452653 | 3.78E-02 | 9.04E-02 | -4.926424273 |
| Rftn1         | -0.615448393 | 8.501303902 | -5.52262709  | 1.88E-05 | 2.39E-04 | 2.505044679  |
| Prkca         | -0.616653541 | 4.744676194 | -2.535713604 | 1.94E-02 | 5.37E-02 | -4.312075313 |
| Ccr9          | -0.617079018 | 6.708486551 | -2.447455195 | 2.34E-02 | 6.21E-02 | -4.488112269 |
| Pla2g16       | -0.617440817 | 8.650881302 | -5.005405099 | 6.22E-05 | 5.96E-04 | 1.301737247  |
| Il2ra         | -0.618170747 | 6.1703802   | -2.704332494 | 1.34E-02 | 4.07E-02 | -3.966960698 |
| Nr4a2         | -0.621749245 | 7.629327767 | -2.701395335 | 1.35E-02 | 4.09E-02 | -3.973064801 |
| Spsb1         | -0.624148136 | 7.518544567 | -2.877069439 | 9.13E-03 | 3.02E-02 | -3.602705033 |
| E130311K13Rik | -0.624467361 | 6.670934166 | -3.997614258 | 6.72E-04 | 3.95E-03 | -1.068419953 |
| Trbj1-6       | -0.625567346 | 8.669095088 | -2.936994971 | 7.97E-03 | 2.70E-02 | -3.474072848 |
| Wdr91         | -0.626362986 | 8.174263296 | -8.15740076  | 6.86E-08 | 2.37E-06 | 8.179261295  |
| BC021614      | -0.626386124 | 6.386156855 | -2.5573337   | 1.85E-02 | 5.19E-02 | -4.268452637 |
| LOC102636093  | -0.626612054 | 6.91202084  | -2.726006572 | 1.28E-02 | 3.92E-02 | -3.921820433 |
| Scn4b         | -0.627338567 | 5.986040055 | -3.481712868 | 2.27E-03 | 1.01E-02 | -2.262553482 |
| Abcg1         | -0.627716459 | 9.144544143 | -5.577209157 | 1.66E-05 | 2.15E-04 | 2.63082258   |
| Serpinc1      | -0.627784749 | 5.723618465 | -3.72379421  | 1.29E-03 | 6.57E-03 | -1.706069282 |
| Tmem19        | -0.628596993 | 8.52873234  | -5.800507216 | 9.97E-06 | 1.44E-04 | 3.142507608  |
| Pla2g4f       | -0.633631169 | 6.05381645  | -3.506025172 | 2.15E-03 | 9.67E-03 | -2.207056965 |
| Gm10277       | -0.634411238 | 6.435102868 | -3.257189117 | 3.83E-03 | 1.52E-02 | -2.770010885 |
| Chka          | -0.637530227 | 8.123180258 | -5.48498442  | 2.05E-05 | 2.55E-04 | 2.418150179  |
| Cenpv         | -0.63868707  | 6.677468049 | -3.90965444  | 8.28E-04 | 4.63E-03 | -1.273989633 |
| Notch4        | -0.639762617 | 6.469330801 | -4.350829837 | 2.91E-04 | 2.07E-03 | -0.23847573  |
| Zfyve1        | -0.640678202 | 7.44914547  | -7.467792746 | 2.73E-07 | 7.29E-06 | 6.780930085  |
| Dusp2         | -0.642150711 | 8.301216617 | -4.832347194 | 9.33E-05 | 8.18E-04 | 0.895553626  |
| Cd2           | -0.643148722 | 6.563491584 | -2.273164752 | 3.38E-02 | 8.32E-02 | -4.82543489  |
| LOC102632070  | -0.643909482 | 5.871555446 | -3.048293444 | 6.19E-03 | 2.20E-02 | -3.232370606 |
| Il1r1         | -0.644181317 | 5.033624163 | -2.319689819 | 3.07E-02 | 7.72E-02 | -4.73679733  |
| LOC102632231  | -0.644792231 | 7.362839127 | -4.453389691 | 2.28E-04 | 1.70E-03 | 0.003111128  |
| Stra6l        | -0.644895991 | 7.104218902 | -2.949475892 | 7.75E-03 | 2.65E-02 | -3.447145525 |
| Rnf180        | -0.647487006 | 6.716873853 | -4.302106652 | 3.27E-04 | 2.29E-03 | -0.353293945 |
| Sbf2          | -0.647505623 | 8.228797713 | -7.386263688 | 3.22E-07 | 8.38E-06 | 6.611340802  |
| Gpr33         | -0.648818835 | 7.530817407 | -4.504385292 | 2.02E-04 | 1.57E-03 | 0.123299433  |

|               |              |             |              |          |          |              |
|---------------|--------------|-------------|--------------|----------|----------|--------------|
| Fnip2         | -0.649954586 | 7.759473744 | -5.431796356 | 2.31E-05 | 2.75E-04 | 2.295166563  |
| Cx3cl1        | -0.650183903 | 6.049129719 | -3.697685798 | 1.37E-03 | 6.86E-03 | -1.766466598 |
| Mmp14         | -0.650730752 | 6.163449278 | -2.663903984 | 1.47E-02 | 4.36E-02 | -4.050701852 |
| Rasal2        | -0.652386641 | 7.649890943 | -3.565071561 | 1.87E-03 | 8.74E-03 | -2.071884208 |
| Eml5          | -0.652885528 | 7.86389125  | -4.232225948 | 3.85E-04 | 2.59E-03 | -0.517761481 |
| Adcy4         | -0.654406691 | 5.273531497 | -2.959669713 | 7.57E-03 | 2.60E-02 | -3.425118498 |
| Galc          | -0.654683836 | 6.986739478 | -5.363486457 | 2.71E-05 | 3.09E-04 | 2.136880137  |
| Gpr137b       | -0.655454417 | 7.307606651 | -4.095817884 | 5.33E-04 | 3.30E-03 | -0.838276851 |
| Gm1965        | -0.657161589 | 7.120679071 | -2.577049441 | 1.77E-02 | 5.02E-02 | -4.228506233 |
| Amn1          | -0.65754266  | 7.730898699 | -5.28293833  | 3.26E-05 | 3.57E-04 | 1.949773145  |
| Arhgef9       | -0.657740037 | 5.903035744 | -4.056501569 | 5.85E-04 | 3.54E-03 | -0.930486855 |
| Irf1          | -0.658247472 | 8.778343769 | -7.163969719 | 5.11E-07 | 1.25E-05 | 6.144396554  |
| Spic          | -0.658730673 | 6.848823071 | -2.318105388 | 3.08E-02 | 7.73E-02 | -4.739833272 |
| Il4ra         | -0.658989821 | 8.748551574 | -5.860795061 | 8.70E-06 | 1.29E-04 | 3.279816311  |
| Scaper        | -0.660204285 | 8.834122499 | -9.69763088  | 3.92E-09 | 2.24E-07 | 11.07199171  |
| Leprel1       | -0.660916378 | 7.262982211 | -3.235340341 | 4.03E-03 | 1.58E-02 | -2.81885098  |
| Asap2         | -0.662051457 | 7.998992225 | -6.347209174 | 2.95E-06 | 5.34E-05 | 4.373187499  |
| Rab30         | -0.666933245 | 9.814604645 | -5.533547386 | 1.83E-05 | 2.34E-04 | 2.530230219  |
| Galnt12       | -0.667561379 | 7.791512267 | -4.610550588 | 1.57E-04 | 1.27E-03 | 0.373488449  |
| Mir155        | -0.669530864 | 5.804127117 | -2.149923998 | 4.36E-02 | 1.01E-01 | -5.054939124 |
| Ptafr         | -0.671726118 | 8.032854137 | -4.281393109 | 3.43E-04 | 2.37E-03 | -0.402058894 |
| Grk5          | -0.674334896 | 8.194875821 | -5.368245021 | 2.68E-05 | 3.08E-04 | 2.147918528  |
| 2510009E07Rik | -0.674385282 | 6.168242168 | -3.806692131 | 1.06E-03 | 5.66E-03 | -1.513783748 |
| 4930487H11Rik | -0.677673069 | 5.403209446 | -4.258241686 | 3.62E-04 | 2.47E-03 | -0.456549233 |
| Lag3          | -0.679346119 | 6.76458427  | -3.330808504 | 3.23E-03 | 1.34E-02 | -2.604696807 |
| Izumo4        | -0.681830296 | 7.431203413 | -4.805201073 | 9.94E-05 | 8.68E-04 | 0.831729846  |
| Ltb           | -0.682744711 | 7.152595761 | -4.608201723 | 1.58E-04 | 1.27E-03 | 0.367954209  |
| Casp4         | -0.683719233 | 7.747665533 | -6.745647213 | 1.24E-06 | 2.64E-05 | 5.24790272   |
| Mctp2         | -0.68485294  | 5.066018869 | -2.732477442 | 1.26E-02 | 3.88E-02 | -3.908310989 |
| Slc25a29      | -0.686782195 | 6.235858642 | -4.819948944 | 9.61E-05 | 8.40E-04 | 0.866407009  |
| Nudt9         | -0.68783357  | 8.026309762 | -6.032675851 | 5.91E-06 | 9.29E-05 | 3.669190278  |
| Pdgfa         | -0.689547311 | 6.39406221  | -4.506255866 | 2.01E-04 | 1.57E-03 | 0.127708122  |
| Zmat1         | -0.689827815 | 7.02098841  | -3.495580274 | 2.20E-03 | 9.86E-03 | -2.23091087  |
| Grina         | -0.69042514  | 8.795838638 | -5.844524886 | 9.02E-06 | 1.32E-04 | 3.24279679   |
| Gdap10        | -0.69161246  | 9.220410884 | -6.391253895 | 2.67E-06 | 4.97E-05 | 4.470843766  |
| Ccser2        | -0.69214864  | 9.951697815 | -7.735405752 | 1.58E-07 | 4.68E-06 | 7.331258578  |
| Hepacam2      | -0.69270737  | 6.008295626 | -3.502274926 | 2.16E-03 | 9.75E-03 | -2.215623756 |
| Tmcc3         | -0.692930903 | 7.039926554 | -5.017277612 | 6.05E-05 | 5.85E-04 | 1.329552131  |
| Strip2        | -0.693533596 | 8.744283296 | -3.474284132 | 2.31E-03 | 1.03E-02 | -2.279491242 |
| Tagap         | -0.69353785  | 8.707594605 | -4.837595296 | 9.22E-05 | 8.10E-04 | 0.907889564  |
| Pmaip1        | -0.693910293 | 8.382504491 | -5.095511306 | 5.04E-05 | 5.02E-04 | 1.512647661  |
| Renbp         | -0.694395091 | 6.636110869 | -5.048941125 | 5.62E-05 | 5.54E-04 | 1.403697     |
| Chst11        | -0.695394732 | 6.981830444 | -3.993619614 | 6.79E-04 | 3.97E-03 | -1.077768312 |
| Zfp945        | -0.695461313 | 7.496625102 | -5.297422654 | 3.15E-05 | 3.48E-04 | 1.983454608  |
| Clnk          | -0.695972675 | 6.504583493 | -3.763750979 | 1.17E-03 | 6.13E-03 | -1.613482082 |
| Trem14        | -0.696278584 | 8.190843141 | -3.718899224 | 1.30E-03 | 6.60E-03 | -1.717399197 |
| Havcr1        | -0.696446809 | 5.413989509 | -2.547707825 | 1.89E-02 | 5.26E-02 | -4.287898388 |
| Mt1           | -0.696840025 | 8.526046102 | -4.518837308 | 1.95E-04 | 1.53E-03 | 0.157360734  |
| Cxcl16        | -0.696844118 | 10.71335507 | -5.645436211 | 1.42E-05 | 1.89E-04 | 2.78766604   |
| Atp11a        | -0.697524216 | 8.515980279 | -7.348725458 | 3.48E-07 | 9.00E-06 | 6.532955347  |
| Rnf19b        | -0.697707007 | 10.39380614 | -7.577656727 | 2.18E-07 | 6.00E-06 | 7.008035199  |
| Pianp         | -0.698838629 | 6.269934137 | -3.346583763 | 3.11E-03 | 1.30E-02 | -2.569129202 |
| Egr3          | -0.699850299 | 6.959687874 | -2.742099242 | 1.23E-02 | 3.82E-02 | -3.888195762 |
| Tnfrsf9       | -0.700879416 | 6.853810243 | -3.999922571 | 6.69E-04 | 3.93E-03 | -1.063017477 |
| Dapl1         | -0.702031675 | 5.257824769 | -2.118597909 | 4.64E-02 | 1.05E-01 | -5.111998755 |
| Sla2          | -0.703330842 | 6.011888199 | -2.239762892 | 3.63E-02 | 8.75E-02 | -4.888408862 |
| Spib          | -0.715398085 | 6.878346384 | -3.342038305 | 3.15E-03 | 1.31E-02 | -2.579382636 |
| Atp1b1        | -0.716229212 | 6.698861839 | -3.733661314 | 1.26E-03 | 6.46E-03 | -1.68322238  |
| Hpgds         | -0.716308066 | 5.039068728 | -3.606978067 | 1.69E-03 | 8.07E-03 | -1.975631891 |
| Tnfaip3       | -0.716522289 | 9.737589431 | -6.632898076 | 1.58E-06 | 3.25E-05 | 5.002391205  |
| Cacnb1        | -0.720942868 | 6.912137309 | -6.215290659 | 3.94E-06 | 6.63E-05 | 4.079315477  |
| Arhgap8       | -0.722201301 | 5.097424559 | -2.727327048 | 1.27E-02 | 3.91E-02 | -3.919064846 |
| Ppp1r15a      | -0.723425305 | 10.27427317 | -7.225980455 | 4.49E-07 | 1.13E-05 | 6.275321298  |
| Cpq           | -0.723677907 | 6.957047967 | -5.474714015 | 2.09E-05 | 2.60E-04 | 2.394420943  |
| Fam49a        | -0.725940004 | 10.52776753 | -6.961962158 | 7.82E-07 | 1.75E-05 | 5.714347013  |
| Bmp1          | -0.729646685 | 5.386705702 | -3.805055358 | 1.06E-03 | 5.66E-03 | -1.517587465 |
| Olfir108      | -0.732724649 | 5.283151633 | -2.769185407 | 1.16E-02 | 3.62E-02 | -3.831395295 |
| Dscaml1       | -0.734402379 | 5.86052372  | -4.909894957 | 7.78E-05 | 7.08E-04 | 1.077726315  |

|               |              |             |              |          |          |              |
|---------------|--------------|-------------|--------------|----------|----------|--------------|
| Entpd1        | -0.734791587 | 7.963696257 | -4.87189193  | 8.50E-05 | 7.54E-04 | 0.988480415  |
| Tubb2b        | -0.735648185 | 7.767366025 | -4.238319019 | 3.80E-04 | 2.57E-03 | -0.503427127 |
| Ccr5          | -0.736197945 | 6.231595598 | -2.877730007 | 9.11E-03 | 3.02E-02 | -3.601293147 |
| AW112010      | -0.736449198 | 10.15438181 | -4.436519256 | 2.37E-04 | 1.76E-03 | -0.036647528 |
| Fgr           | -0.736646414 | 8.274756724 | -2.247851767 | 3.57E-02 | 8.66E-02 | -4.87321011  |
| H2-Q5         | -0.736801242 | 9.356464689 | -7.78832294  | 1.42E-07 | 4.33E-06 | 7.438925923  |
| Adam11        | -0.741466419 | 8.34307666  | -4.948017632 | 7.11E-05 | 6.63E-04 | 1.167190994  |
| Trp53inp1     | -0.741603861 | 7.784251399 | -5.674494642 | 1.33E-05 | 1.81E-04 | 2.854335708  |
| Tec           | -0.743205561 | 8.253682196 | -5.901632579 | 7.93E-06 | 1.20E-04 | 3.372612894  |
| Tmem39a       | -0.743662756 | 9.613834003 | -6.263966181 | 3.54E-06 | 6.17E-05 | 4.18798765   |
| Cdcp1         | -0.744511404 | 5.864575959 | -3.83726443  | 9.83E-04 | 5.34E-03 | -1.442686875 |
| Rogdi         | -0.745249963 | 11.30467892 | -8.910264802 | 1.63E-08 | 7.78E-07 | 9.632310589  |
| Ift43         | -0.749049737 | 6.928648174 | -5.484542615 | 2.05E-05 | 2.55E-04 | 2.417129597  |
| Nabp1         | -0.752238757 | 10.5218103  | -6.602648105 | 1.69E-06 | 3.40E-05 | 4.936247702  |
| Snx24         | -0.753055353 | 4.709116672 | -3.168131177 | 4.70E-03 | 1.78E-02 | -2.9684131   |
| Enpp5         | -0.753449033 | 6.348916038 | -2.874560903 | 9.18E-03 | 3.03E-02 | -3.608065482 |
| 5430437J10Rik | -0.756696146 | 7.554636855 | -3.600385733 | 1.72E-03 | 8.16E-03 | -1.990790103 |
| Emp2          | -0.763945818 | 5.419228437 | -2.738356178 | 1.24E-02 | 3.85E-02 | -3.896024863 |
| Foxh1         | -0.763983467 | 5.517276132 | -6.21970085  | 3.90E-06 | 6.62E-05 | 4.089172983  |
| Cttnbp2nl     | -0.764810043 | 8.293471147 | -4.472135205 | 2.18E-04 | 1.65E-03 | 0.047290515  |
| Pvr           | -0.767562172 | 8.29720449  | -7.730030344 | 1.60E-07 | 4.68E-06 | 7.320300234  |
| 4921511I17Rik | -0.768237206 | 7.372573061 | -5.229410114 | 3.69E-05 | 3.97E-04 | 1.825170416  |
| Myo1e         | -0.768943349 | 5.99485464  | -2.96622379  | 7.46E-03 | 2.57E-02 | -3.410940267 |
| Cd14          | -0.77033498  | 6.280781495 | -3.114373932 | 5.32E-03 | 1.96E-02 | -3.087269048 |
| Mir3097       | -0.771643165 | 7.739232883 | -4.366891625 | 2.80E-04 | 2.01E-03 | -0.200710774 |
| Pstpip2       | -0.772043956 | 6.13053436  | -3.004865303 | 6.84E-03 | 2.39E-02 | -3.327097405 |
| Gnb4          | -0.773110558 | 8.434280596 | -4.172602559 | 4.44E-04 | 2.88E-03 | -0.657957379 |
| Spint2        | -0.779994834 | 8.820075567 | -7.894803814 | 1.15E-07 | 3.65E-06 | 7.654420145  |
| Ube2e2        | -0.781126207 | 6.800375566 | -5.09122047  | 5.09E-05 | 5.06E-04 | 1.502614455  |
| Erc1          | -0.781798599 | 6.552512306 | -5.259488122 | 3.44E-05 | 3.75E-04 | 1.895210671  |
| Ccng2         | -0.783817337 | 9.114131972 | -6.963336596 | 7.80E-07 | 1.75E-05 | 5.717291238  |
| Il1b          | -0.784615602 | 8.334010182 | -3.636275806 | 1.58E-03 | 7.68E-03 | -1.908192584 |
| Rasgrp1       | -0.789483468 | 6.51362526  | -3.139879298 | 5.02E-03 | 1.88E-02 | -3.030965608 |
| Sdc4          | -0.791268598 | 7.233748444 | -4.413128581 | 2.51E-04 | 1.84E-03 | -0.091768909 |
| Olfir98       | -0.792692532 | 7.521583878 | -4.148725497 | 4.70E-04 | 3.01E-03 | -0.714059924 |
| LOC102635290  | -0.793428859 | 6.459515137 | -3.381135073 | 2.87E-03 | 1.22E-02 | -2.491059089 |
| Cacna1e       | -0.793492758 | 6.591674235 | -3.491379013 | 2.22E-03 | 9.93E-03 | -2.240500636 |
| Cdh2          | -0.795170725 | 5.960212555 | -3.632224488 | 1.59E-03 | 7.74E-03 | -1.917525142 |
| H2-Q7         | -0.798472847 | 9.882887511 | -6.542564642 | 1.92E-06 | 3.75E-05 | 4.804530907  |
| Csf1          | -0.798546768 | 6.307309958 | -3.202452426 | 4.35E-03 | 1.67E-02 | -2.892167044 |
| Smagp         | -0.801817227 | 6.77142385  | -7.171656196 | 5.03E-07 | 1.24E-05 | 6.160653095  |
| Nfkbid        | -0.802706953 | 8.235729146 | -4.923110363 | 7.54E-05 | 6.95E-04 | 1.108746976  |
| Adam8         | -0.803366667 | 9.635298195 | -7.055787688 | 6.42E-07 | 1.51E-05 | 5.914762239  |
| Hes1          | -0.803638678 | 5.937299761 | -4.424231169 | 2.44E-04 | 1.80E-03 | -0.065605664 |
| Itgb5         | -0.804161594 | 6.119361564 | -5.015621856 | 6.07E-05 | 5.85E-04 | 1.325673467  |
| S1pr1         | -0.805889001 | 6.288286262 | -2.71227799  | 1.32E-02 | 4.01E-02 | -3.950432408 |
| Csf2rb2       | -0.809197338 | 9.042320093 | -7.039973259 | 6.63E-07 | 1.53E-05 | 5.881063382  |
| Cd40          | -0.815471618 | 8.786299272 | -7.97526362  | 9.81E-08 | 3.19E-06 | 7.816228978  |
| Fam129c       | -0.819074543 | 6.144756143 | -5.335825888 | 2.88E-05 | 3.24E-04 | 2.07268171   |
| Fmn1          | -0.819125403 | 7.043431058 | -5.653399938 | 1.39E-05 | 1.87E-04 | 2.805945373  |
| Cxcl10        | -0.821606396 | 6.84682039  | -3.957145966 | 7.40E-04 | 4.23E-03 | -1.163071578 |
| Tmem120b      | -0.823623481 | 7.158514121 | -5.814021416 | 9.67E-06 | 1.40E-04 | 3.17331911   |
| Gabbr1        | -0.823792124 | 6.837708429 | -4.907907401 | 7.81E-05 | 7.10E-04 | 1.073060252  |
| Nfkbiz        | -0.826717357 | 8.903886475 | -7.594546808 | 2.11E-07 | 5.88E-06 | 7.042804235  |
| Oprd1         | -0.82731036  | 6.834656496 | -4.458059618 | 2.26E-04 | 1.69E-03 | 0.014117061  |
| Nlrp1b        | -0.828155134 | 6.982256958 | -4.261045942 | 3.60E-04 | 2.46E-03 | -0.449949838 |
| Cd69          | -0.828737824 | 6.796739945 | -5.122560579 | 4.73E-05 | 4.81E-04 | 1.575871611  |
| Gm19723       | -0.831914519 | 6.886787169 | -5.220230952 | 3.77E-05 | 4.03E-04 | 1.803783222  |
| Stxbp1        | -0.835223352 | 6.556577383 | -5.368283075 | 2.68E-05 | 3.08E-04 | 2.148006796  |
| Cd83          | -0.838301754 | 9.309094156 | -7.878406277 | 1.19E-07 | 3.74E-06 | 7.62133569   |
| Csrnp1        | -0.838708757 | 8.299377188 | -7.162336456 | 5.13E-07 | 1.25E-05 | 6.140941263  |
| Scn2b         | -0.844533627 | 6.422007653 | -6.258080861 | 3.58E-06 | 6.23E-05 | 4.174862916  |
| Zdhhc14       | -0.847043458 | 7.707144481 | -6.317624941 | 3.14E-06 | 5.58E-05 | 4.307462501  |
| Gm5797        | -0.854182251 | 7.79616844  | -4.684014996 | 1.32E-04 | 1.10E-03 | 0.546536884  |
| Arc           | -0.85428618  | 6.947228554 | -5.590596017 | 1.61E-05 | 2.12E-04 | 2.66163044   |
| Birc2         | -0.857048126 | 9.322988779 | -7.909089493 | 1.12E-07 | 3.57E-06 | 7.683213763  |
| Calm4         | -0.85770284  | 7.312268148 | -4.053878631 | 5.88E-04 | 3.54E-03 | -0.936635315 |
| Dgkh          | -0.858186726 | 6.178628513 | -5.694325011 | 1.27E-05 | 1.74E-04 | 2.899787201  |

|               |              |             |              |          |          |              |
|---------------|--------------|-------------|--------------|----------|----------|--------------|
| Nlrc5         | -0.858877382 | 8.490616903 | -8.725272309 | 2.31E-08 | 1.02E-06 | 9.282307441  |
| Stat4         | -0.859881288 | 7.914666835 | -4.489917169 | 2.09E-04 | 1.60E-03 | 0.089199982  |
| Bhlhe40       | -0.862073534 | 8.641581431 | -5.182642334 | 4.11E-05 | 4.33E-04 | 1.716143831  |
| Cd81          | -0.862894163 | 10.64802317 | -5.497347568 | 1.99E-05 | 2.49E-04 | 2.446702722  |
| Abcg3         | -0.863023222 | 7.276252655 | -4.99694402  | 6.34E-05 | 6.05E-04 | 1.281910249  |
| Psca          | -0.863209448 | 4.527116622 | -3.237070872 | 4.01E-03 | 1.57E-02 | -2.814986435 |
| Fxyd2         | -0.865695718 | 6.188534062 | -4.425344549 | 2.44E-04 | 1.80E-03 | -0.062981921 |
| Tnnt2         | -0.869648822 | 7.155603206 | -3.552142124 | 1.93E-03 | 8.94E-03 | -2.101528934 |
| LOC102634822  | -0.870745089 | 7.604991526 | -4.236012804 | 3.82E-04 | 2.58E-03 | -0.5088528   |
| Trbj1-1       | -0.872369143 | 6.039754236 | -2.69208706  | 1.38E-02 | 4.16E-02 | -3.992388764 |
| Serpina3g     | -0.875123767 | 9.750266444 | -6.195737934 | 4.11E-06 | 6.83E-05 | 4.035584742  |
| Ccl17         | -0.875903705 | 7.23637869  | -2.988500547 | 7.10E-03 | 2.46E-02 | -3.362656925 |
| Eno2          | -0.87627127  | 6.883518439 | -4.928265863 | 7.45E-05 | 6.90E-04 | 1.120846459  |
| Rragd         | -0.877189081 | 5.30797966  | -6.428449409 | 2.47E-06 | 4.63E-05 | 4.553131283  |
| Trbj2-7       | -0.878376071 | 6.983072538 | -2.098447321 | 4.84E-02 | 1.09E-01 | -5.148418929 |
| 9330175E14Rik | -0.88257904  | 6.071710989 | -2.901058918 | 8.65E-03 | 2.89E-02 | -3.551343008 |
| Ly75          | -0.883976518 | 8.662952836 | -5.600180031 | 1.57E-05 | 2.09E-04 | 2.683676648  |
| Hap1          | -0.892140218 | 6.347979654 | -5.0422018   | 5.71E-05 | 5.58E-04 | 1.387920366  |
| Sned1         | -0.897204145 | 6.617780335 | -4.306421969 | 3.23E-04 | 2.27E-03 | -0.343133219 |
| Pde8a         | -0.899802655 | 6.828592452 | -5.509932703 | 1.93E-05 | 2.44E-04 | 2.475754519  |
| LOC102634900  | -0.904247663 | 6.59448961  | -5.53808329  | 1.81E-05 | 2.32E-04 | 2.540688336  |
| Cdkn1a        | -0.905915438 | 10.55864255 | -7.297376441 | 3.87E-07 | 9.80E-06 | 6.42542337   |
| Gal3st2       | -0.908505235 | 7.93288929  | -4.953716726 | 7.02E-05 | 6.58E-04 | 1.18055973   |
| Tctex1d4      | -0.913835166 | 5.892603968 | -4.23113952  | 3.86E-04 | 2.60E-03 | -0.520317245 |
| Lef1          | -0.915167755 | 5.742376523 | -2.590135995 | 1.72E-02 | 4.92E-02 | -4.20190502  |
| Egr2          | -0.915304204 | 6.81097633  | -4.255595472 | 3.65E-04 | 2.49E-03 | -0.462776481 |
| Pilrb1        | -0.915628204 | 4.839470505 | -2.665704871 | 1.46E-02 | 4.35E-02 | -4.046984518 |
| Fndc7         | -0.915672348 | 6.347289666 | -6.769889567 | 1.18E-06 | 2.54E-05 | 5.300478413  |
| Tnni3         | -0.918318236 | 8.266889756 | -7.561430993 | 2.25E-07 | 6.15E-06 | 6.974597266  |
| Maml2         | -0.923726842 | 7.171548022 | -5.588118258 | 1.62E-05 | 2.13E-04 | 2.655929469  |
| Ctla2b        | -0.926982572 | 5.45870636  | -3.148288039 | 4.92E-03 | 1.85E-02 | -3.012368017 |
| 2610528A11Rik | -0.930668038 | 6.423871747 | -2.62440517  | 1.60E-02 | 4.65E-02 | -4.131924777 |
| Serinc5       | -0.932476691 | 7.377011638 | -7.981936767 | 9.68E-08 | 3.17E-06 | 7.829609431  |
| Tns1          | -0.933972625 | 7.251446382 | -6.595183884 | 1.72E-06 | 3.42E-05 | 4.919908996  |
| Fnbp1l        | -0.934531496 | 8.563502455 | -6.45420489  | 2.33E-06 | 4.46E-05 | 4.610011346  |
| Itk           | -0.93933743  | 5.372851719 | -2.669420228 | 1.45E-02 | 4.33E-02 | -4.039311557 |
| Nrp2          | -0.945790458 | 6.163040967 | -5.561331769 | 1.72E-05 | 2.22E-04 | 2.594262261  |
| Cadm1         | -0.949691647 | 8.560750181 | -6.433767764 | 2.44E-06 | 4.62E-05 | 4.564883318  |
| Cd96          | -0.950304233 | 5.296380933 | -3.552617099 | 1.92E-03 | 8.94E-03 | -2.100440353 |
| Scin          | -0.951378332 | 5.666870296 | -3.695285136 | 1.37E-03 | 6.88E-03 | -1.772015974 |
| Ttc39b        | -0.953268857 | 7.850540114 | -7.656364726 | 1.86E-07 | 5.27E-06 | 7.169728757  |
| Bcl2l11       | -0.953344327 | 7.351244766 | -8.683102232 | 2.50E-08 | 1.08E-06 | 9.201885069  |
| Poglut1       | -0.956622665 | 9.874388144 | -9.610746346 | 4.58E-09 | 2.57E-07 | 10.91702953  |
| Timd4         | -0.962209218 | 5.872775417 | -3.07946778  | 5.77E-03 | 2.08E-02 | -3.164058639 |
| Trpm2         | -0.967800581 | 6.134968766 | -4.981359977 | 6.58E-05 | 6.26E-04 | 1.245382476  |
| Homer2        | -0.975586947 | 5.125106947 | -4.920486839 | 7.59E-05 | 6.97E-04 | 1.102589357  |
| Ltss1l        | -0.977263692 | 6.853228425 | -5.222975593 | 3.75E-05 | 4.01E-04 | 1.810178761  |
| Lck           | -0.980297686 | 6.697700307 | -2.977746537 | 7.27E-03 | 2.51E-02 | -3.385983295 |
| Basp1         | -0.982571887 | 9.214062707 | -14.55592017 | 2.55E-12 | 8.01E-10 | 18.40989075  |
| Cdkn2b        | -0.987012826 | 6.895543904 | -4.278618756 | 3.45E-04 | 2.38E-03 | -0.40858956  |
| Arhgef12      | -0.988636947 | 5.942036877 | -9.390610671 | 6.78E-09 | 3.60E-07 | 10.52011802  |
| Ccnd2         | -0.988785515 | 7.228677565 | -4.48915103  | 2.10E-04 | 1.60E-03 | 0.087394293  |
| Eno3          | -0.989232249 | 9.223672038 | -8.576155382 | 3.06E-08 | 1.19E-06 | 8.996861098  |
| Cxcl2         | -0.99020728  | 6.120702276 | -2.178285765 | 4.11E-02 | 9.64E-02 | -5.002823588 |
| Gm6644        | -0.990956887 | 5.266271756 | -2.147100596 | 4.38E-02 | 1.01E-01 | -5.060103659 |
| Fam46c        | -0.991445304 | 8.055999939 | -8.07640341  | 8.04E-08 | 2.70E-06 | 8.018376032  |
| Traj43        | -0.993660028 | 5.964098492 | -2.226728772 | 3.72E-02 | 8.92E-02 | -4.912829562 |
| Gpr126        | -0.994586856 | 7.198298172 | -5.171493058 | 4.22E-05 | 4.38E-04 | 1.690130997  |
| LOC102633435  | -0.994844091 | 6.533668971 | -3.201102832 | 4.36E-03 | 1.68E-02 | -2.895170403 |
| LOC102639105  | -0.9998685   | 10.94276412 | -8.850532001 | 1.82E-08 | 8.52E-07 | 9.519793352  |
| Phxr4         | -1.000176195 | 7.23784469  | -5.695019171 | 1.27E-05 | 1.74E-04 | 2.901377545  |
| Il15ra        | -1.000904104 | 8.848225173 | -6.10608777  | 5.02E-06 | 8.05E-05 | 3.834515378  |
| 4932438H23Rik | -1.001229661 | 7.438397143 | -6.351160532 | 2.92E-06 | 5.32E-05 | 4.381958001  |
| Extl1         | -1.001303697 | 6.200261255 | -4.066822033 | 5.71E-04 | 3.49E-03 | -0.906290536 |
| Fas           | -1.002772074 | 7.278762663 | -5.099473053 | 4.99E-05 | 4.99E-04 | 1.521910409  |
| Mfge8         | -1.00532135  | 8.008199872 | -6.536838931 | 1.95E-06 | 3.78E-05 | 4.791955317  |
| Nlrp1c-ps     | -1.012010806 | 6.660966512 | -2.545912059 | 1.90E-02 | 5.27E-02 | -4.29152191  |
| Etv3          | -1.012156912 | 10.13802526 | -7.8337819   | 1.30E-07 | 4.02E-06 | 7.531113943  |

|               |              |             |              |          |          |              |
|---------------|--------------|-------------|--------------|----------|----------|--------------|
| Mir29a        | -1.013362644 | 4.240694836 | -2.465498418 | 2.25E-02 | 6.04E-02 | -4.452396599 |
| Bcl2a1b       | -1.014309099 | 11.29044787 | -10.15923654 | 1.76E-09 | 1.27E-07 | 11.87950511  |
| Tmem150c      | -1.017285823 | 7.576876665 | -4.063993539 | 5.74E-04 | 3.50E-03 | -0.912922566 |
| Zc3h12c       | -1.017829275 | 9.266847298 | -10.47456062 | 1.03E-09 | 8.63E-08 | 12.4161839   |
| Vmn2r90       | -1.018416716 | 4.203111535 | -3.47615204  | 2.30E-03 | 1.02E-02 | -2.27523322  |
| Yes1          | -1.019852457 | 5.503583187 | -3.233441344 | 4.05E-03 | 1.58E-02 | -2.823090973 |
| Cflar         | -1.025653902 | 9.028725244 | -8.449593548 | 3.89E-08 | 1.45E-06 | 8.752250972  |
| LOC102638508  | -1.031245664 | 6.202001187 | -4.579989032 | 1.69E-04 | 1.35E-03 | 0.301476261  |
| Trbc2         | -1.032948789 | 9.557385329 | -3.560558844 | 1.89E-03 | 8.81E-03 | -2.082233854 |
| Traj39        | -1.038551543 | 5.323567993 | -2.292547004 | 3.25E-02 | 8.04E-02 | -4.78863757  |
| Gm3696        | -1.040876019 | 6.567447241 | -2.788136492 | 1.11E-02 | 3.50E-02 | -3.791503592 |
| Rhoc          | -1.041229098 | 7.49019953  | -3.500378056 | 2.17E-03 | 9.77E-03 | -2.219955961 |
| Asb2          | -1.042520546 | 6.804679942 | -7.684630146 | 1.75E-07 | 5.09E-06 | 7.227590183  |
| A630001O12Rik | -1.047101087 | 4.608080994 | -2.443582909 | 2.36E-02 | 6.25E-02 | -4.495758596 |
| Tspan3        | -1.047491818 | 9.552115575 | -8.597170369 | 2.94E-08 | 1.18E-06 | 9.037269113  |
| Myo6          | -1.049882543 | 5.736837342 | -4.797697741 | 1.01E-04 | 8.79E-04 | 0.814084228  |
| Rasgef1b      | -1.054774751 | 7.355784036 | -6.427638313 | 2.47E-06 | 4.63E-05 | 4.551338691  |
| Slamf1        | -1.055561218 | 6.195467169 | -3.655652964 | 1.51E-03 | 7.41E-03 | -1.863525337 |
| Cldn1         | -1.056138474 | 8.730410583 | -6.36427758  | 2.84E-06 | 5.24E-05 | 4.411059395  |
| Il15          | -1.058133117 | 8.38113635  | -5.731789196 | 1.16E-05 | 1.63E-04 | 2.985552423  |
| Arl5c         | -1.059015942 | 8.455719936 | -10.26502754 | 1.47E-09 | 1.09E-07 | 12.06089174  |
| Slc44a1       | -1.066736178 | 9.094280242 | -10.14270816 | 1.81E-09 | 1.27E-07 | 11.85104347  |
| Gfra2         | -1.070907891 | 6.940531456 | -4.76450427  | 1.09E-04 | 9.33E-04 | 0.736001665  |
| Traj23        | -1.071238217 | 5.38865494  | -3.446170557 | 2.47E-03 | 1.07E-02 | -2.343506533 |
| Frmd5         | -1.071886043 | 6.163515456 | -4.947532823 | 7.12E-05 | 6.63E-04 | 1.166053675  |
| Idh1          | -1.072810096 | 9.001287755 | -9.704046211 | 3.88E-09 | 2.24E-07 | 11.083396    |
| Pfkfb3        | -1.077557237 | 9.784084317 | -8.984583361 | 1.42E-08 | 6.87E-07 | 9.771644605  |
| Trbc1         | -1.077892409 | 8.658557022 | -3.158806563 | 4.81E-03 | 1.81E-02 | -2.989080035 |
| Slc41a2       | -1.08018519  | 7.295470705 | -6.203803081 | 4.04E-06 | 6.74E-05 | 4.053628247  |
| Snn           | -1.090563941 | 7.548240817 | -7.779218973 | 1.45E-07 | 4.37E-06 | 7.4204298    |
| Gbp9          | -1.092729567 | 9.836111383 | -9.422757384 | 6.40E-09 | 3.49E-07 | 10.57846558  |
| Perm1         | -1.10133357  | 6.543290689 | -12.45671202 | 4.63E-11 | 8.72E-09 | 15.53275402  |
| Rbpms         | -1.103586256 | 7.747178594 | -9.017806598 | 1.34E-08 | 6.63E-07 | 9.833696923  |
| Tnfrsf1b      | -1.109247958 | 9.326362226 | -8.391288767 | 4.35E-08 | 1.59E-06 | 8.638837627  |
| E030011O05Rik | -1.115675773 | 6.394928518 | -5.286285994 | 3.23E-05 | 3.55E-04 | 1.957559065  |
| Trib1         | -1.118700848 | 8.149807637 | -7.657044044 | 1.86E-07 | 5.27E-06 | 7.171120646  |
| Il27          | -1.1198908   | 7.038506616 | -4.634962022 | 1.49E-04 | 1.21E-03 | 0.431000513  |
| Ttc39a        | -1.120160962 | 7.940951292 | -8.433591149 | 4.01E-08 | 1.48E-06 | 8.721169071  |
| Vsig10        | -1.1206719   | 6.573835531 | -6.163877436 | 4.42E-06 | 7.24E-05 | 3.964232493  |
| Fah           | -1.123537486 | 5.988454985 | -5.550629505 | 1.76E-05 | 2.27E-04 | 2.569605841  |
| Gm10677       | -1.127823368 | 6.472742237 | -6.762347569 | 1.20E-06 | 2.56E-05 | 5.284129767  |
| Esam          | -1.13109667  | 5.533618529 | -6.23992572  | 3.73E-06 | 6.42E-05 | 4.134349907  |
| Procr         | -1.133007201 | 7.392912417 | -6.998232092 | 7.24E-07 | 1.65E-05 | 5.791958702  |
| Arhgap28      | -1.133292017 | 6.962414143 | -6.854526986 | 9.83E-07 | 2.14E-05 | 5.48344201   |
| Trbj2-6       | -1.133317879 | 4.907188606 | -2.515253508 | 2.03E-02 | 5.56E-02 | -4.353179247 |
| Mxd1          | -1.134991772 | 9.559405354 | -9.856577755 | 2.97E-09 | 1.78E-07 | 11.35302664  |
| Heatr9        | -1.143311894 | 6.760031674 | -6.9796405   | 7.53E-07 | 1.71E-05 | 5.752197371  |
| F11r          | -1.144324322 | 7.638311332 | -6.228466335 | 3.83E-06 | 6.56E-05 | 4.108758574  |
| Adam23        | -1.155833997 | 10.78064334 | -11.56005865 | 1.80E-10 | 2.12E-08 | 14.17561529  |
| Klri1         | -1.156276654 | 6.456371583 | -5.071657364 | 5.33E-05 | 5.28E-04 | 1.456856834  |
| Gatsl2        | -1.158669671 | 7.740080245 | -8.013107724 | 9.10E-08 | 3.04E-06 | 7.892030603  |
| Relb          | -1.161912774 | 9.468017796 | -9.723278047 | 3.75E-09 | 2.21E-07 | 11.1175527   |
| Cd3d          | -1.165888131 | 6.971837659 | -3.205379914 | 4.32E-03 | 1.66E-02 | -2.885650837 |
| Ankrd33b      | -1.166511572 | 6.361669232 | -6.325387493 | 3.09E-06 | 5.52E-05 | 4.32471807   |
| Cd274         | -1.166941768 | 8.431430832 | -9.195229747 | 9.65E-09 | 4.85E-07 | 10.16262838  |
| Prkcb         | -1.167690929 | 8.267696816 | -6.87939974  | 9.32E-07 | 2.04E-05 | 5.537033773  |
| Samsn1        | -1.167868138 | 9.734249563 | -9.886926985 | 2.82E-09 | 1.74E-07 | 11.40632898  |
| Synpo2        | -1.172267739 | 6.138728657 | -7.126288085 | 5.53E-07 | 1.33E-05 | 6.064587672  |
| Tmem123       | -1.174094737 | 10.91072837 | -13.40796435 | 1.19E-11 | 2.49E-09 | 16.8856409   |
| Myof          | -1.177085443 | 7.327679361 | -8.595356864 | 2.95E-08 | 1.18E-06 | 9.033784405  |
| Lat           | -1.184002726 | 6.989621968 | -3.225202753 | 4.12E-03 | 1.60E-02 | -2.841476403 |
| Bst1          | -1.185660161 | 7.161537891 | -7.110392419 | 5.72E-07 | 1.36E-05 | 6.030864296  |
| Traf1         | -1.1879407   | 10.06478964 | -11.67957438 | 1.49E-10 | 2.01E-08 | 14.36135354  |
| Traj22        | -1.189954805 | 5.284663302 | -2.800200191 | 1.08E-02 | 3.44E-02 | -3.766046112 |
| Tcf7l2        | -1.190539431 | 8.288708339 | -10.29884423 | 1.39E-09 | 1.08E-07 | 12.1185881   |
| Spint1        | -1.192278753 | 7.095951847 | -6.883659719 | 9.24E-07 | 2.04E-05 | 5.546204405  |
| Laptn4b       | -1.192923713 | 7.818255141 | -8.589806823 | 2.98E-08 | 1.18E-06 | 9.023117087  |
| Sema7a        | -1.197364376 | 7.618505621 | -8.156569983 | 6.87E-08 | 2.37E-06 | 8.177615646  |

|               |              |             |              |          |          |              |
|---------------|--------------|-------------|--------------|----------|----------|--------------|
| Ccl2          | -1.203484733 | 6.444811623 | -3.723115039 | 1.29E-03 | 6.57E-03 | -1.707641457 |
| Thy1          | -1.206963519 | 6.632655824 | -3.857145414 | 9.38E-04 | 5.13E-03 | -1.3964041   |
| Nipal1        | -1.212240617 | 6.501934289 | -6.175041663 | 4.31E-06 | 7.09E-05 | 3.989248294  |
| Dgkk          | -1.21373729  | 6.404650083 | -7.667774092 | 1.82E-07 | 5.22E-06 | 7.193097662  |
| Igf2r         | -1.218215562 | 6.252836095 | -7.331293059 | 3.61E-07 | 9.26E-06 | 6.496489286  |
| Mical3        | -1.225786332 | 8.373186707 | -9.005980323 | 1.37E-08 | 6.69E-07 | 9.811625172  |
| Glipr2        | -1.228611199 | 7.568716101 | -9.200241285 | 9.57E-09 | 4.85E-07 | 10.17185981  |
| Naalad2       | -1.22990461  | 4.553482999 | -4.878010928 | 8.38E-05 | 7.51E-04 | 1.002854182  |
| Apoe          | -1.247479685 | 8.081830388 | -5.398377143 | 2.50E-05 | 2.91E-04 | 2.217774573  |
| Plekhn1       | -1.248531068 | 8.385330343 | -8.163992438 | 6.77E-08 | 2.37E-06 | 8.192315134  |
| Stfa2l1       | -1.257313684 | 3.659557381 | -4.621453762 | 1.53E-04 | 1.25E-03 | 0.399176813  |
| Tmem150cos    | -1.261041497 | 6.161443142 | -5.008781086 | 6.17E-05 | 5.93E-04 | 1.309647236  |
| Zbtb10        | -1.270531705 | 8.14872384  | -8.387415218 | 4.39E-08 | 1.59E-06 | 8.63128662   |
| LOC102632809  | -1.270695517 | 6.950672693 | -5.175692014 | 4.18E-05 | 4.37E-04 | 1.699928695  |
| St6gal1       | -1.281221827 | 8.589884546 | -12.07173204 | 8.21E-11 | 1.34E-08 | 14.96021261  |
| Cd38          | -1.282233206 | 7.193817602 | -10.46361062 | 1.05E-09 | 8.63E-08 | 12.39774618  |
| Trac          | -1.282917197 | 8.733904043 | -3.397192883 | 2.77E-03 | 1.18E-02 | -2.454698765 |
| Traj19        | -1.294047157 | 3.678687285 | -2.265761708 | 3.44E-02 | 8.40E-02 | -4.839440444 |
| Bcl2l14       | -1.296420379 | 6.679585554 | -9.411889948 | 6.52E-09 | 3.51E-07 | 10.55875559  |
| Igkj1         | -1.299474139 | 7.545239457 | -2.357078737 | 2.84E-02 | 7.22E-02 | -4.664807649 |
| Src           | -1.306366438 | 6.673639372 | -10.14063147 | 1.82E-09 | 1.27E-07 | 11.84746509  |
| Rgs1          | -1.307165662 | 10.50565477 | -10.36142879 | 1.25E-09 | 1.00E-07 | 12.22500471  |
| Exoc3l4       | -1.310695684 | 6.417277582 | -8.248099026 | 5.74E-08 | 2.04E-06 | 8.35835801   |
| Tmem176b      | -1.324659092 | 9.772513397 | -11.65241293 | 1.56E-10 | 2.02E-08 | 14.31927628  |
| Mmp23         | -1.324758779 | 6.964847608 | -9.353660494 | 7.24E-09 | 3.79E-07 | 10.45288796  |
| Socs2         | -1.339444964 | 6.369648136 | -7.13872712  | 5.39E-07 | 1.30E-05 | 6.090954197  |
| Nuak1         | -1.340978289 | 6.866511441 | -5.780735716 | 1.04E-05 | 1.48E-04 | 3.097396722  |
| H2-Eb2        | -1.343483101 | 8.237811341 | -6.664022639 | 1.48E-06 | 3.08E-05 | 5.070326485  |
| Gm13710       | -1.34456804  | 5.496354147 | -3.359509442 | 3.02E-03 | 1.27E-02 | -2.539949988 |
| Loxl3         | -1.350332497 | 6.642279417 | -9.244228635 | 8.83E-09 | 4.56E-07 | 10.25274601  |
| 2200002D01Rik | -1.352359041 | 8.398306857 | -9.989943017 | 2.36E-09 | 1.53E-07 | 11.58640536  |
| Dnase1l3      | -1.355696748 | 10.43426646 | -11.71066001 | 1.42E-10 | 1.99E-08 | 14.40941361  |
| Ccrl2         | -1.360367092 | 8.37656918  | -8.622564952 | 2.80E-08 | 1.18E-06 | 9.086019306  |
| Tcf7          | -1.367844951 | 8.206866171 | -5.75821167  | 1.10E-05 | 1.55E-04 | 3.045958005  |
| Epsti1        | -1.373028794 | 10.99479522 | -10.90153884 | 5.12E-10 | 4.82E-08 | 13.12419294  |
| Pik3r3        | -1.378200882 | 6.016700141 | -5.652689563 | 1.39E-05 | 1.87E-04 | 2.804315074  |
| Adora2a       | -1.37889237  | 8.418815621 | -8.847994382 | 1.83E-08 | 8.52E-07 | 9.515002838  |
| 0610040B10Rik | -1.382596171 | 6.627295527 | -3.853302034 | 9.46E-04 | 5.17E-03 | -1.405354379 |
| Cd3g          | -1.388248025 | 6.372259831 | -4.023117938 | 6.33E-04 | 3.77E-03 | -1.008709855 |
| Pdlim4        | -1.390107891 | 7.972144293 | -10.28116099 | 1.43E-09 | 1.08E-07 | 12.08843498  |
| Mmp25         | -1.390789444 | 8.128123082 | -7.428036619 | 2.96E-07 | 7.80E-06 | 6.698345303  |
| LOC102638993  | -1.400721899 | 7.922518274 | -6.943174752 | 8.14E-07 | 1.82E-05 | 5.674077101  |
| Icos          | -1.402288805 | 8.472618963 | -11.10377677 | 3.69E-10 | 3.66E-08 | 13.45223015  |
| Gbp2          | -1.413304822 | 7.326664642 | -5.94322128  | 7.23E-06 | 1.10E-04 | 3.466936245  |
| Olfr164       | -1.415369444 | 5.330024857 | -2.292102448 | 3.25E-02 | 8.04E-02 | -4.789483638 |
| Gem           | -1.448378191 | 6.753656349 | -7.588120882 | 2.13E-07 | 5.91E-06 | 7.029580727  |
| Cd207         | -1.450319752 | 6.744875284 | -8.826986245 | 1.91E-08 | 8.76E-07 | 9.475310911  |
| Cd8a          | -1.454813733 | 8.739158364 | -7.73872626  | 1.57E-07 | 4.68E-06 | 7.338025823  |
| Foxp4         | -1.468911554 | 8.455609935 | -10.06113665 | 2.08E-09 | 1.38E-07 | 11.71009088  |
| Il23r         | -1.475646623 | 5.434826588 | -4.287679735 | 3.38E-04 | 2.35E-03 | -0.387259768 |
| Gm16524       | -1.476467282 | 7.133819505 | -5.439295393 | 2.27E-05 | 2.73E-04 | 2.312520337  |
| Igkc          | -1.482682126 | 7.666143451 | -2.181176867 | 4.09E-02 | 9.60E-02 | -4.997487116 |
| 2210409E12Rik | -1.491866796 | 5.310097792 | -4.925898441 | 7.49E-05 | 6.92E-04 | 1.115290484  |
| Arhgap42      | -1.532547779 | 5.257296872 | -5.91121568  | 7.77E-06 | 1.18E-04 | 3.394363634  |
| Serpinb9      | -1.540598812 | 8.023507824 | -7.916244817 | 1.10E-07 | 3.55E-06 | 7.697625287  |
| Spata31d1b    | -1.547273259 | 6.080334146 | -5.173485698 | 4.20E-05 | 4.38E-04 | 1.694780697  |
| Itgae         | -1.548985151 | 5.754123003 | -7.835695183 | 1.30E-07 | 4.02E-06 | 7.53498779   |
| Glycam1       | -1.580102957 | 5.807860298 | -2.854948726 | 9.59E-03 | 3.12E-02 | -3.649905735 |
| Ier3          | -1.587248196 | 8.03625432  | -6.525250847 | 2.00E-06 | 3.86E-05 | 4.766491513  |
| Traj12        | -1.591515363 | 6.188481269 | -2.619705152 | 1.62E-02 | 4.69E-02 | -4.141549746 |
| Traj18        | -1.613997737 | 6.048889584 | -3.146865271 | 4.94E-03 | 1.85E-02 | -3.015515963 |
| Il7r          | -1.616054168 | 8.214495016 | -6.132871849 | 4.73E-06 | 7.65E-05 | 3.894683208  |
| Gbp5          | -1.620976995 | 8.207441373 | -7.647928745 | 1.89E-07 | 5.32E-06 | 7.152438617  |
| Stap2         | -1.621149975 | 8.184655574 | -10.68323662 | 7.32E-10 | 6.58E-08 | 12.76485636  |
| Il21r         | -1.626572836 | 8.484907492 | -7.198351563 | 4.76E-07 | 1.19E-05 | 6.217051265  |
| Tnfrsf4       | -1.63103031  | 8.344897055 | -11.77245192 | 1.29E-10 | 1.95E-08 | 14.50464299  |
| Gm9257        | -1.632617684 | 4.315911572 | -3.12799261  | 5.16E-03 | 1.92E-02 | -3.057225739 |
| Pmp           | -1.652435547 | 7.1176222   | -5.782123683 | 1.04E-05 | 1.48E-04 | 3.100564803  |



|               |              |             |              |          |          |              |
|---------------|--------------|-------------|--------------|----------|----------|--------------|
| Cd3e          | -1.658216574 | 6.375508994 | -4.270888097 | 3.52E-04 | 2.41E-03 | -0.426785937 |
| 2610034B18Rik | -1.674552604 | 8.096127708 | -9.484337277 | 5.73E-09 | 3.18E-07 | 10.6898658   |
| Gca           | -1.692222333 | 8.433500794 | -11.04981275 | 4.03E-10 | 3.89E-08 | 13.36515062  |
| Adm           | -1.70965815  | 5.621088435 | -9.878141458 | 2.86E-09 | 1.74E-07 | 11.39091073  |
| Atxn1         | -1.727933495 | 7.02812664  | -11.37212919 | 2.41E-10 | 2.75E-08 | 13.88044067  |
| Slc4a8        | -1.73665521  | 7.911053065 | -10.68177148 | 7.33E-10 | 6.58E-08 | 12.76242606  |
| Clu           | -1.760484106 | 7.811548096 | -7.48441563  | 2.64E-07 | 7.10E-06 | 6.815397109  |
| Ins16         | -1.763551604 | 7.184780897 | -8.451044591 | 3.88E-08 | 1.45E-06 | 8.755067666  |
| Cpne8         | -1.778326484 | 4.713023765 | -6.35747034  | 2.88E-06 | 5.27E-05 | 4.395959479  |
| Lad1          | -1.783417733 | 7.675622289 | -10.52586002 | 9.50E-10 | 8.32E-08 | 12.5023735   |
| Catsperg1     | -1.78417998  | 6.01083675  | -3.98070304  | 7.00E-04 | 4.05E-03 | -1.107988247 |
| Tmem176a      | -1.788997244 | 8.96562728  | -11.71937342 | 1.40E-10 | 1.99E-08 | 14.42286658  |
| Tm4sf5        | -1.802821975 | 7.421446797 | -8.731838835 | 2.28E-08 | 1.02E-06 | 9.294809089  |
| Mpz12         | -1.848263317 | 6.129227521 | -10.27990626 | 1.44E-09 | 1.08E-07 | 12.08629402  |
| Actn1         | -1.849897112 | 8.808033297 | -11.13806883 | 3.50E-10 | 3.66E-08 | 13.50739606  |
| Tnf           | -1.861703043 | 8.951195836 | -14.27289285 | 3.69E-12 | 1.04E-09 | 18.04447981  |
| Serpinb6b     | -1.872539134 | 8.883593062 | -11.97015413 | 9.57E-11 | 1.50E-08 | 14.8066323   |
| Papss2        | -1.87327357  | 7.845593061 | -8.585750667 | 3.00E-08 | 1.18E-06 | 9.015318442  |
| Mab21l3       | -1.90348289  | 7.347695515 | -11.11573604 | 3.62E-10 | 3.66E-08 | 13.47148409  |
| Slco5a1       | -1.904317523 | 7.734937526 | -9.968073298 | 2.45E-09 | 1.56E-07 | 11.54828574  |
| Cd8b1         | -1.912686924 | 6.375170188 | -5.234178822 | 3.65E-05 | 3.94E-04 | 1.836279102  |
| Ccl19         | -1.913118171 | 6.66566471  | -8.452991167 | 3.87E-08 | 1.45E-06 | 8.758845819  |
| Traj37        | -1.923388967 | 3.780071184 | -3.093916336 | 5.58E-03 | 2.03E-02 | -3.132311335 |
| Olfr109       | -1.931489368 | 6.683633351 | -7.306749344 | 3.80E-07 | 9.68E-06 | 6.445078008  |
| Art2a-ps      | -1.950293401 | 8.487501198 | -8.610805808 | 2.86E-08 | 1.18E-06 | 9.063455921  |
| Nr4a3         | -1.962737337 | 8.756167861 | -8.624642827 | 2.79E-08 | 1.18E-06 | 9.090004397  |
| Gbp4          | -1.974144195 | 7.301715279 | -11.57730589 | 1.75E-10 | 2.12E-08 | 14.20251356  |
| Gbp8          | -1.986534544 | 9.647635722 | -12.50099513 | 4.34E-11 | 8.60E-09 | 15.59766085  |
| Gclc          | -1.998605386 | 8.926358168 | -20.90509046 | 2.31E-15 | 1.74E-12 | 25.17121623  |
| Sema6d        | -2.008283465 | 8.109943708 | -8.153327569 | 6.91E-08 | 2.37E-06 | 8.171191995  |
| Gm11837       | -2.016096398 | 5.469303034 | -11.29738005 | 2.71E-10 | 3.01E-08 | 13.76196362  |
| Serpinb1a     | -2.045616871 | 7.963415846 | -8.768987474 | 2.12E-08 | 9.64E-07 | 9.365426161  |
| Zfp872        | -2.125857936 | 6.597179897 | -8.592433692 | 2.96E-08 | 1.18E-06 | 9.02816651   |
| Akap2         | -2.132865733 | 8.127523956 | -9.937619579 | 2.58E-09 | 1.62E-07 | 11.49510567  |
| Zmynd15       | -2.156070955 | 8.678656716 | -11.61561966 | 1.65E-10 | 2.07E-08 | 14.26215228  |
| Mt2           | -2.192515977 | 7.279654706 | -8.291978569 | 5.28E-08 | 1.89E-06 | 8.444604034  |
| Jag1          | -2.192878828 | 7.21121173  | -12.17053344 | 7.07E-11 | 1.23E-08 | 15.108579    |
| Asprv1        | -2.199842242 | 7.089679277 | -10.08182402 | 2.01E-09 | 1.38E-07 | 11.74591478  |
| Apol10b       | -2.257382919 | 6.892952355 | -8.691510754 | 2.46E-08 | 1.08E-06 | 9.217939871  |
| Gzmc          | -2.268875612 | 4.500343425 | -3.98440496  | 6.94E-04 | 4.04E-03 | -1.099328364 |
| Nudt17        | -2.270996237 | 8.359305642 | -13.57623537 | 9.43E-12 | 2.09E-09 | 17.11622356  |
| Adcy6         | -2.285640913 | 8.255273089 | -10.50364253 | 9.86E-10 | 8.44E-08 | 12.46508342  |
| Vcam1         | -2.325809042 | 7.210051655 | -14.23680135 | 3.87E-12 | 1.04E-09 | 17.99740659  |
| Ccl5          | -2.397169052 | 11.56374644 | -18.91354553 | 1.65E-14 | 1.04E-11 | 23.30813992  |
| Cacnb3        | -2.423317694 | 8.08297635  | -16.5842445  | 2.12E-13 | 1.14E-10 | 20.84821411  |
| Gm15698       | -2.481728646 | 5.716071614 | -10.06251968 | 2.08E-09 | 1.38E-07 | 11.71248748  |
| Gm8221        | -2.560261981 | 7.407882758 | -12.15807984 | 7.21E-11 | 1.23E-08 | 15.08993275  |
| Cpa3          | -2.632520328 | 5.410089988 | -5.794347887 | 1.01E-05 | 1.45E-04 | 3.128458622  |
| Ccr7          | -2.664035522 | 9.670087648 | -15.67552598 | 6.24E-13 | 2.94E-10 | 19.79328973  |
| Il12b         | -2.713441422 | 7.579085673 | -14.5583463  | 2.54E-12 | 8.01E-10 | 18.41299473  |
| Cd63          | -2.834003333 | 9.88766756  | -14.16775993 | 4.24E-12 | 1.07E-09 | 17.90705388  |
| Mreg          | -2.842697204 | 9.196542901 | -24.2180945  | 1.24E-16 | 2.34E-13 | 27.87007213  |
| Apol7c        | -2.848135358 | 10.10859492 | -13.94814775 | 5.69E-12 | 1.34E-09 | 17.61697279  |
| Gadd45b       | -2.863605084 | 10.13053105 | -26.91096005 | 1.51E-17 | 5.68E-14 | 29.76084255  |
| Anxa3         | -2.911391355 | 9.445309531 | -15.18024545 | 1.15E-12 | 4.68E-10 | 19.19320111  |
| Ccl22         | -3.139844221 | 10.1259617  | -21.99889213 | 8.42E-16 | 7.93E-13 | 26.11326567  |
| H2-M2         | -3.163042469 | 9.339898873 | -22.28004265 | 6.54E-16 | 7.93E-13 | 26.34689463  |
| Fscn1         | -3.6072096   | 9.717929982 | -15.12009122 | 1.24E-12 | 4.68E-10 | 19.11905551  |
| Mcpt4         | -3.854927438 | 4.669062579 | -4.936288172 | 7.31E-05 | 6.79E-04 | 1.139671726  |
